# Supplementary material for: Solvent-free aerobic photocatalytic oxidation of C(sp3)–H and C(sp3)–OH to CO bonds
Source: Royal Society of Chemistry journal article supplement (doi:10.1039/d3gc04209j), 2024-01-01
Supplement: d3gc04209j1.pdf [file d3gc04209j1.pdf]

# **Solvent-free aerobic photocatalytic oxidation of C(sp<sup>3</sup>)–H and C(sp<sup>3</sup>)–OH to C=O bonds**

Xulu Jiang, <sup>a</sup> Weitao Wang, <sup>\*,a</sup> Huan Wang, <sup>a</sup> Zhen-Hong He, <sup>a</sup> Yang Yang, <sup>a</sup> Kuan Wang, <sup>a</sup> Zhao-Tie Liu <sup>\*,a, b</sup> Buxing Han <sup>\*,c</sup>

<sup>a</sup> Shaanxi Key Laboratory of Chemical Additives for Industry, College of Chemistry and Chemical Engineering, Shaanxi University of Science & Technology, Xi'an 710021, China.

<sup>b</sup> School of Chemistry & Chemical Engineering, Shaanxi Normal University, Xi'an 710119, China.

<sup>c</sup> Beijing National Laboratory for Molecular Sciences, CAS Key Laboratory of Colloid and Interface and Thermodynamics, Center for Carbon Neutral Chemistry, Institute of Chemistry, Chinese Academy of Sciences, Beijing 100190, China.

\*E-mails: wangweitao@sust.edu.cn (W. Wang), ztliu@snnu.edu.cn (Z.-T. Liu), hanbx@iccas.ac.cn (B. Han)

**1. EXPERIMENT Page S2**

**2. TABLES Pages S3-S6**

**3. FIGURES Pages S7-17**

**4. REFERENCES Pages S18-19**

**5. NMR DATA Pages S20-S55**

**6. HPLC/GC, HPLC-MS/GC-MS, AND <sup>1</sup>H NMR DATA  
Pages S56-91**

## 1. EXPERIMENT

The conversion of ethyl benzene (Conv.), the yield of acetophenone (Y) and the selectivity of acetophenone (Sel.) were calculated as follows:

$$\text{Conversion}_{(\text{ethyl benzene})} = \left( 1 - \frac{n_{\text{remaining ethylbenzene}}}{n_{\text{initial ethylbenzene}}} \right) \times 100\%$$

$$\text{Yield}_{(\text{acetophenone})} = \frac{n_{\text{acetophenone}}}{n_{\text{initial ethylbenzene}}} \times 100\%$$

$$\text{Selectivity}_{(\text{acetophenone})} = \frac{\text{Yield}_{\text{acetophenone}}}{\text{Conversion}_{\text{ethyl benzene}}} \times 100\%$$

## 2. TABLES

**Table S1** Photocatalytic oxidation of ethylbenzene to acetophenone over different catalysts.

| Entry | Catalyst                                            | Substrate    | Reaction conditions                                                                                                             | Solvent                        | Conv. (%) | Fr ( $\mu\text{mol}\cdot\text{g}^{-1}\cdot\text{h}^{-1}$ ) <sup>a</sup> | Ref. |
|-------|-----------------------------------------------------|--------------|---------------------------------------------------------------------------------------------------------------------------------|--------------------------------|-----------|-------------------------------------------------------------------------|------|
| 1     | 4CD/BiMO                                            | Ethylbenzene | Catalyst (20 mg), 10 W white LED, $\lambda > 420$ nm, 1 atm O <sub>2</sub> , RT, 16 h.                                          | acetonitrile (8 mL)            | 38        | 416                                                                     | [1]  |
| 2     | VO@g-C <sub>3</sub> N <sub>4</sub>                  | Ethylbenzene | Catalyst (25 mg), 40 W domestic bulb, H <sub>2</sub> O <sub>2</sub> (1.5 mmol), RT, 12 h.                                       | acetonitrile (2 mL)            | 99        | 3330                                                                    | [2]  |
| 3     | BiVO <sub>4</sub> /Ag/C <sub>3</sub> N <sub>4</sub> | Ethylbenzene | Catalyst (50 mg), visible light irradiation ( $\lambda > 400$ nm), O <sub>2</sub> flow rate (3 mL·min <sup>-1</sup> ), RT, 3 h. | acetonitrile (5 mL)            | >99       | 140                                                                     | [3]  |
| 4     | $\alpha$ -Fe <sub>2</sub> O <sub>3</sub>            | Ethylbenzene | Catalyst (10 mg), NHPI (4 mg), HY zeolite (3 mg), O <sub>2</sub> (1 atm), blue LED light (455 nm, 3 W), RT, 8 h.                | acetonitrile (1 mL)            | 98        | 58.4                                                                    | [3]  |
| 5     | FePW/g-C <sub>3</sub> N <sub>4</sub>                | Ethylbenzene | Catalyst (10 mg), <i>t</i> BuOOH (2.5 mmol), purple LED lamp (15 W, 425 nm, 13.4 mW·cm <sup>-2</sup> ), RT, 15 h.               | acetonitrile (10 mL)           | 99        | 6600                                                                    | [4]  |
| 6     | BiOBr <sub>0.85</sub> I <sub>0.15</sub>             | Ethylbenzene | Catalyst (10 mg), NHSI 3 mg, 1 atm O <sub>2</sub> , purple LED lamp (15 W, 425 nm, 13.4 mW·cm <sup>-2</sup> ), RT, 15 h.        | acetonitrile (10 mL)           | 98        | 614                                                                     | [5]  |
| 7     | TCNS-5                                              | Ethylbenzene | Catalyst (20 mg), 1 atm O <sub>2</sub> , solar light, 35 °C, 6 h.                                                               | acetonitrile (10 mL)           | 56.1      | 1561                                                                    | [6]  |
| 8     | p-BiOBr                                             | Ethylbenzene | Catalyst (20 mg), 1 atm O <sub>2</sub> , H <sub>2</sub> O:TBA=2:2, 300 W xenon lamp $\lambda > 320$ nm, RT, 10 h.               | acetonitrile (10 mL)           | 80        | 680                                                                     | [7]  |
| 9     | W10/C8 -AP-SBA                                      | Ethylbenzene | Catalyst (60 mg), O <sub>2</sub> (3 mL·min <sup>-1</sup> ), H <sub>2</sub> O:TBA=2:2, $\lambda > 320$ nm, 6~10 °C, 6 h.         | acetonitrile/water =1:1 (4 mL) | 97        | 4443                                                                    | [8]  |
| 10    | SACo@g-C <sub>3</sub> N <sub>4</sub>                | Ethylbenzene | Catalyst (5 mg), 0.5 mmol PMS, $\lambda > 320$ nm, 60 °C, 15 h.                                                                 | acetonitrile/water =1:1 (4 mL) | 97.5      | 1242                                                                    | [9]  |
| 11    | C, N-TiO <sub>2</sub> nanosheet                     | Ethylbenzene | Catalyst (10 mg), 1 atm O <sub>2</sub> , 100 W Xe lamp (350 < $\lambda$ < 780 nm), RT, 6 h.                                     | methanol (5 mL)                | 100       | 1563                                                                    | [10] |
| 12    | CdS nanocrystals                                    | Ethylbenzene | Catalyst (5 mg), 1 atm O <sub>2</sub> , 40 W CFL lamp, RT, 2 h.                                                                 | benzotrifluoride (5 mL)        | 50        | 2250                                                                    | [11] |
| 13    | Nb <sub>2</sub> O <sub>5</sub>                      | Ethylbenzene | Catalyst (100 mg), O <sub>2</sub> flow, 2 mL·min <sup>-1</sup> , 40 W CFL lamp, RT, 24 h.                                       |                                | 0.35      | 112                                                                     | [12] |

|    |                                                    |                |                                                                                                                           |   |      |         |           |
|----|----------------------------------------------------|----------------|---------------------------------------------------------------------------------------------------------------------------|---|------|---------|-----------|
| 14 | 5wt%Pd/CeO <sub>2</sub>                            | Ethylbenzene   | Catalyst (20 mg), 1 mmol TBHP, visible light, 80 °C, 4 h.                                                                 | - | 99.8 | 9855    | [13]      |
| 15 | Ag/AgBr/TiO <sub>2</sub>                           | Ethylbenzene   | Catalyst (30 mg), 1 atm Air, CFL White 15 W, RT, 4 h.                                                                     | - | 90   | 2160    | [14]      |
| 16 | Ce-BTC MOF                                         | Ethylbenzene   | Catalyst (70 mg), O <sub>2</sub> 5.5 mL·min <sup>-1</sup> , LED λ=450 nm, 160 °C, 20 h.                                   |   | 85   | 23681   | [15]      |
| 17 | 1%Pd/H <sub>2</sub> Ti <sub>3</sub> O <sub>7</sub> | Benzyl alcohol | Catalyst (100 mg), 1 atm O <sub>2</sub> , Halogen lamp (150 W), 90 °C, 6h.                                                |   | 89   | 98318.0 | [16]      |
| 18 | Ir/TiO <sub>2</sub> -p                             | Benzyl alcohol | Catalyst (300 mg), 1 atm O <sub>2</sub> , Halogen lamp (315-420 nm), 80 °C, 6 h.                                          |   | 11   | 17203   | [17]      |
| 19 | Pd/TiO <sub>2</sub> (B)                            | Benzyl alcohol | Catalyst (100 mg), 1 atm O <sub>2</sub> , Halogen lamp (150 W), 90 °C, 4 h.                                               |   | 82   | 2016.0  | [18]      |
| 20 | Cu/Nb <sub>2</sub> O <sub>5</sub>                  | Benzyl alcohol | Catalyst (100 mg), 1 atm O <sub>2</sub> , Halogen lamp (150 W), RT, 24 h.                                                 |   | 36   | 14285.7 | [19]      |
| 21 | Pt-TiO <sub>2</sub>                                | Benzyl alcohol | Catalyst (50 mg), 1 atm O <sub>2</sub> , λ=366 nm, RT, 1 h.                                                               |   | 71   | 440     | [20]      |
| 22 | ZnO/C <sub>3</sub> N <sub>4</sub>                  | Benzyl alcohol | Catalyst (100 mg), EDTA-2Na (1 mmol), 1 atm O <sub>2</sub> , light source (blue LED light, 10 W, λ=400-405 nm), RT, 12 h. |   | 99.8 | 16633.3 | [21]      |
| 23 | 0.27% PdO/C-Nb <sub>2</sub> O <sub>5</sub>         | Ethylbenzene   | Catalyst (100 mg), 1 atm O <sub>2</sub> , light source (blue LED light, 10 W, λ=400-405 nm), RT, 12 h.                    |   | 67.4 | 10997   | This work |
| 24 | 0.27% PdO/C-Nb <sub>2</sub> O <sub>5</sub>         | Ethylbenzene   | Catalyst (100 mg), 1 atm O <sub>2</sub> , light source (blue LED light, 10 W, λ=400-405 nm), RT, 24 h.                    |   | 80.4 | 6776    | This work |
| 25 | 0.27% PdO/C-Nb <sub>2</sub> O <sub>5</sub>         | Ethylbenzene   | Catalyst (100 mg), 1 atm O <sub>2</sub> , light source (blue LED light, 10 W, λ=400-405 nm), RT, 48 h.                    |   | 87.4 | 3665    | This work |
| 26 | 0.27% PdO/C-Nb <sub>2</sub> O <sub>5</sub>         | Benzyl alcohol | Catalyst (100 mg), 1 atm O <sub>2</sub> , light source (blue LED light, 10 W, λ=400-405 nm), RT, 12 h.                    |   | 99.0 | 16500   | This work |

<sup>a</sup> Formation rate (Fr) =  $\mu\text{mol}_{\text{acetophenone}} \cdot \text{g}_{\text{catalyst}}^{-1} \cdot \text{h}_{\text{reaction time}}^{-1}$ .

**Table S2** Photocatalytic oxidation of benzene to phenol over different catalysts.

| Entry | Catalyst                                            | Oxidation                               | Reaction conditions                                                                                                                                 | Conv. (%) | Sel. (%) | Ref.      |
|-------|-----------------------------------------------------|-----------------------------------------|-----------------------------------------------------------------------------------------------------------------------------------------------------|-----------|----------|-----------|
| 1     | BCW-4                                               | O <sub>2</sub> (3 mL/min),              | benzene (0.5mmol), photocatalyst (50 mg), acetonitrile (3 mL), H <sub>2</sub> O (100 $\mu$ L), light irradiation ( $\lambda \geq 400$ nm), RT, 3 h. | 5.8%      | >99%     | 22        |
| 2     | ZnTi-LDH                                            | 1 atm air                               | Benzene (0.2 mmol), 20 mL H <sub>2</sub> O, 20 mg catalyst, 300 W Xe lamp, 3 h, and 48 °C.                                                          | 5.7%      | 81.12%   | 23        |
| 3     | Pt/TiO <sub>2</sub> -P                              | 1 atm O <sub>2</sub>                    | Benzene (18.8 $\mu$ mol), H <sub>2</sub> O 7.5 mL, 300 W Xe lamp, RT, 12 h.                                                                         | 26.6      | 83.8%    | 24        |
| 4     | C16 Qu-PW                                           | 1 atm air                               | benzene (1.28 mmol), photocatalyst (50 mg), acetonitrile 10 mL, water 1 mL, atmospheric air, RT, 10 h.                                              | 20.9      | >99%     | 25        |
| 5     | W <sub>10</sub> O <sub>32</sub>                     | 1 atm O <sub>2</sub>                    | benzene (0.5mmol), photocatalyst (20 mg), Water/aceticacid (5/1), 300 W xenon lamp; 10 °C, 1 h.                                                     | 21.0      | 81       | 26        |
| 6     | (C <sub>16</sub> -Quin) <sub>2</sub> V <sub>6</sub> | 1 atm O <sub>2</sub>                    | benzene (0.5mmol), photocatalyst (50 mg), (H <sub>2</sub> O/CH <sub>3</sub> CN, 3:17 =v:v), light irradiation ( $\lambda \geq 400$ nm), RT, 12 h.   | 22.5      | 99%      | 27        |
| 7     | MIL-100(Fe)                                         | H <sub>2</sub> O <sub>2</sub> (2 mmol)  | benzene (0.5 mmol), photocatalyst (10 mg), CH <sub>3</sub> CN/H <sub>2</sub> O, 1:1=4 mL, light irradiation ( $\lambda \geq 420$ nm), 8 h.          | 22.5%     | 92%      | 28        |
| 8     | 0.2 NCWCN                                           | H <sub>2</sub> O <sub>2</sub> (2 mmol)  | benzene (1 mL, 11.3 mmol), catalyst (20 mg), RT, 15 min, sunlight.                                                                                  | 98.5      | 82.7     | 29        |
| 9     | FeVO <sub>4</sub>                                   | H <sub>2</sub> O <sub>2</sub> (25 mmol) | Benzene (10 mmol), acetonitrile (6 mL), catalyst (50 mg), 300 W Xe lamp, RT, 4 h.                                                                   | 30.4      | 100      | 30        |
| 10    | CuO@CN                                              | H <sub>2</sub> O <sub>2</sub> (25 mmol) | Benzene (1 mmol), MeCN (6 mL), catalyst (40 mg), RT, 12 h and AM 1.5 illumination.                                                                  | 99.9%     | 99.9%    | 31        |
| 12    | PdO/C-Nb <sub>2</sub> O <sub>5</sub>                | 1 atm O <sub>2</sub>                    | Benzene (1 mmol), acetonitrile (2 mL), catalyst (100 mg), blue LED lamp (10 W, 400-405 nm), RT, 48 h.                                               | 7.6%      | 100      | This work |
| 13    | PdO/C-Nb <sub>2</sub> O <sub>5</sub>                | 1 atm O <sub>2</sub>                    | Benzene (1 mmol), acetonitrile (2 mL), catalyst (150 mg), blue LED lamp (10 W, 400-405 nm), RT, 72 h.                                               | 8.03%     | 100      | This work |

**Table S3** Texture properties of prepared materials.

| Entry | Samples                                    | BET surface area (m <sup>2</sup> /g) | BJH adsorption average pore diameter (nm) | BJH pore cumulative volume ( $\times 10^{-3}$ cm <sup>3</sup> /g) |
|-------|--------------------------------------------|--------------------------------------|-------------------------------------------|-------------------------------------------------------------------|
| 1     | Nb <sub>2</sub> O <sub>5</sub> -P          | 31                                   | 16.1881                                   | 0.128706                                                          |
| 2     | C-Nb <sub>2</sub> O <sub>5</sub>           | 233                                  | 5.4603                                    | 0.229425                                                          |
| 3     | 0.27% PdO/C-Nb <sub>2</sub> O <sub>5</sub> | 205                                  | 5.1025                                    | 0.231228                                                          |

**Table S4** X-ray photoelectron spectra of C, Pd, Nb, and O element on the samples surface.

| Entry | Catalysts                                  | C (at. %) | Pd (at. %) | Nb (at. %) | O (at. %) |
|-------|--------------------------------------------|-----------|------------|------------|-----------|
| 1     | Nb <sub>2</sub> O <sub>5</sub> -P          | 8.32      | -          | 57.52      | 34.16     |
| 2     | C-Nb <sub>2</sub> O <sub>5</sub>           | 30.24     | -          | 14.56      | 55.2      |
| 3     | 0.27% PdO/C-Nb <sub>2</sub> O <sub>5</sub> | 17.39     | 0.10       | 20.61      | 61.9      |

**Table S5** The ICP results of 0.27% PdO/C-Nb<sub>2</sub>O<sub>5</sub>

| Entry | Sample                                     | ICP content (Pd wt.%) | Theoretical content (Pd wt.%) |
|-------|--------------------------------------------|-----------------------|-------------------------------|
| 1     | Fresh PdO/C-Nb <sub>2</sub> O <sub>5</sub> | 0.274                 | 0.267                         |
| 2     | Used PdO/C-Nb <sub>2</sub> O <sub>5</sub>  | 0.257                 | 0.267                         |

**Table S6** Photocatalytic oxidation reactions over PdO/Nb<sub>2</sub>O<sub>5</sub> and PdO/C-Nb<sub>2</sub>O<sub>5</sub>

| Entry | Catalyst                             | Substrate       | Conversion (%) | Selectivity (%) |
|-------|--------------------------------------|-----------------|----------------|-----------------|
| 1     | PdO/Nb <sub>2</sub> O <sub>5</sub>   | ethylbenzene    | 23.3           | 87.5            |
| 2     | PdO/Nb <sub>2</sub> O <sub>5</sub>   | 1-phenylethanol | 43.4           | 88.9            |
| 3     | PdO/C-Nb <sub>2</sub> O <sub>5</sub> | ethylbenzene    | 67.4           | 97.7            |
| 4     | PdO/C-Nb <sub>2</sub> O <sub>5</sub> | 1-phenylethanol | 91.2           | 98.9            |

Reaction conditions: substrate 20 mmol, catalyst 100 mg, oxygen pressure 0.1 atm, 25 °C, blue LED light (10 W,  $\lambda = 400\text{--}405$  nm), and a stirring speed of 1500 rpm.

### 3. FIGURES

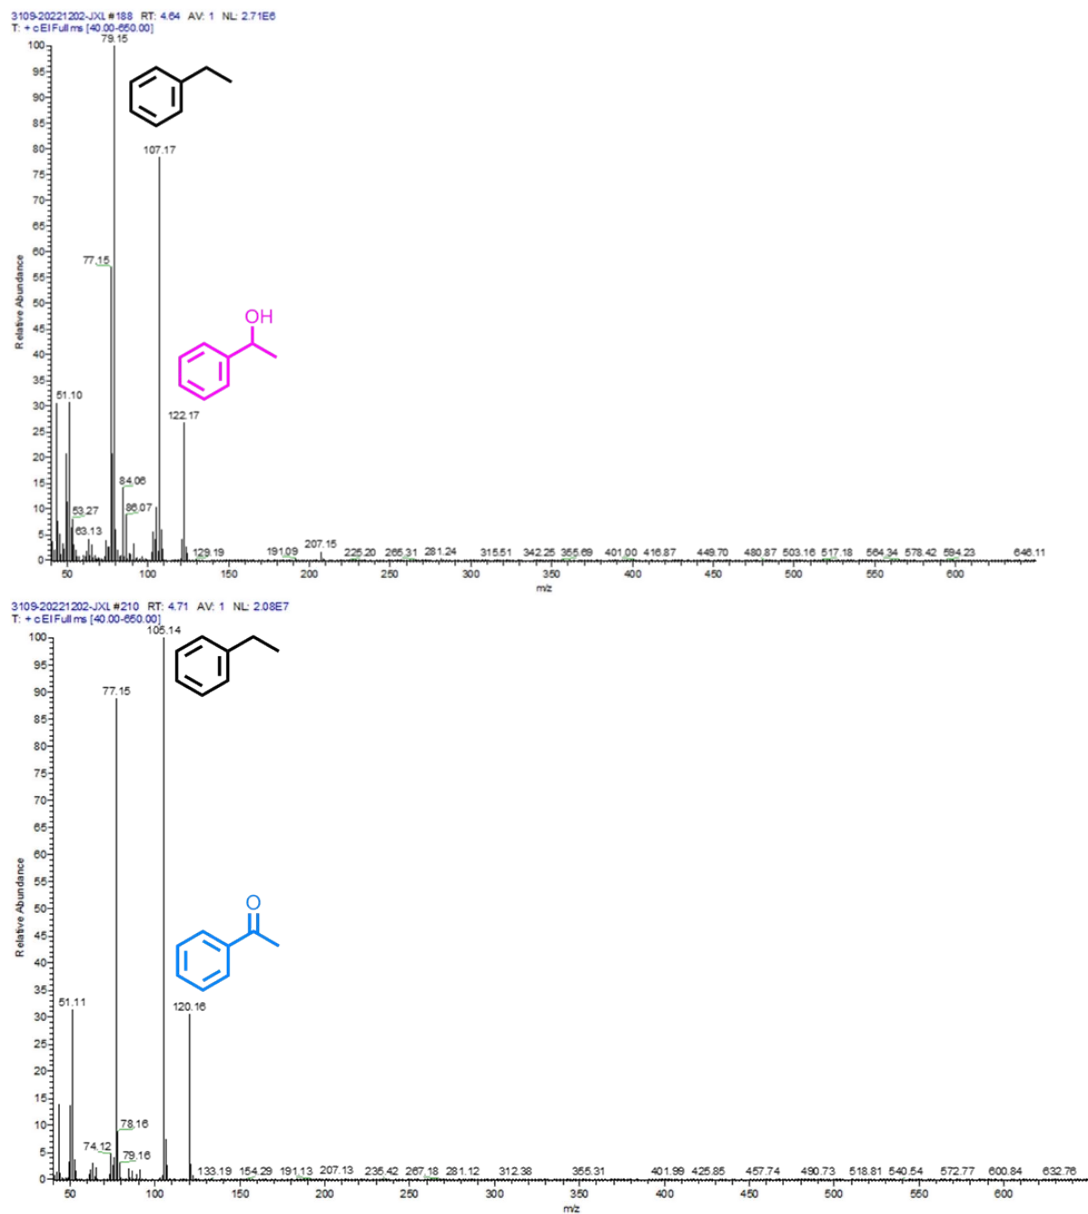

Figure S1 The MS of acetophenone and 1-phenylethanol products.





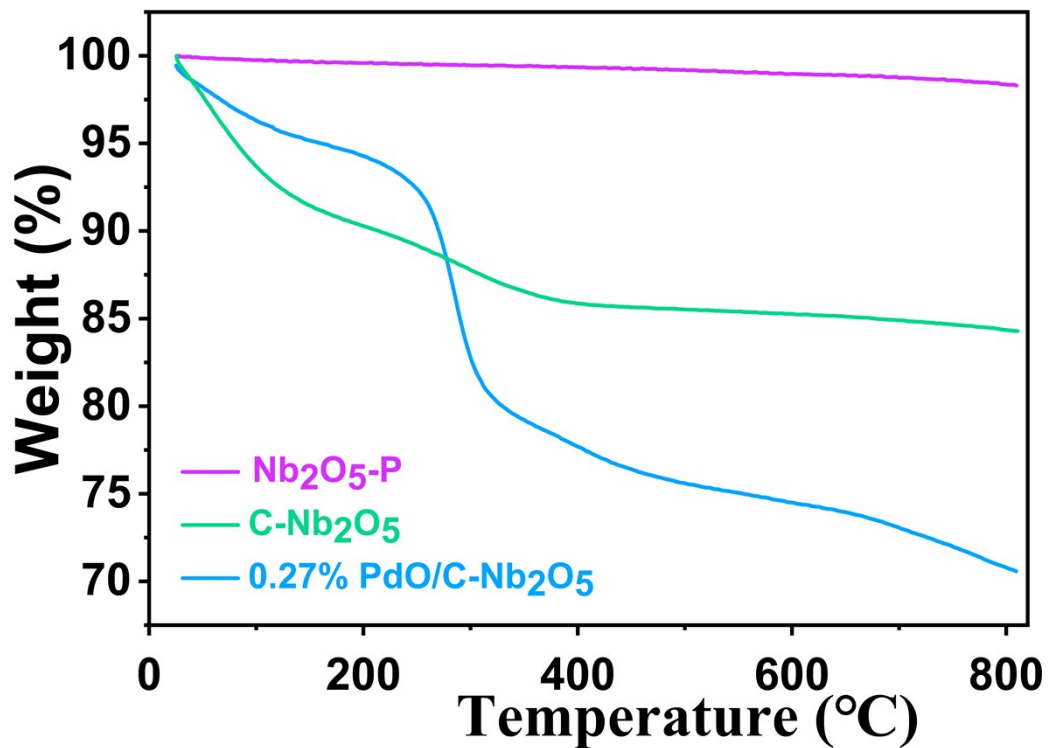

Figure S3 The TG curves of various catalysts

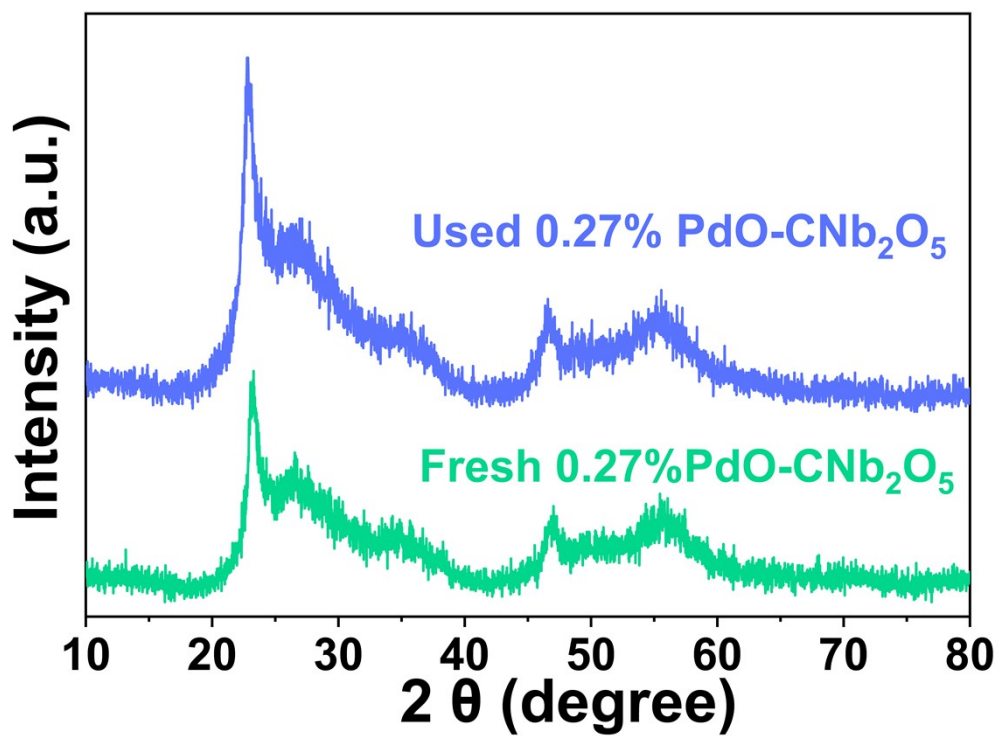

Figure S4 XRD patterns of fresh and used PdO/C-Nb<sub>2</sub>O<sub>5</sub>.

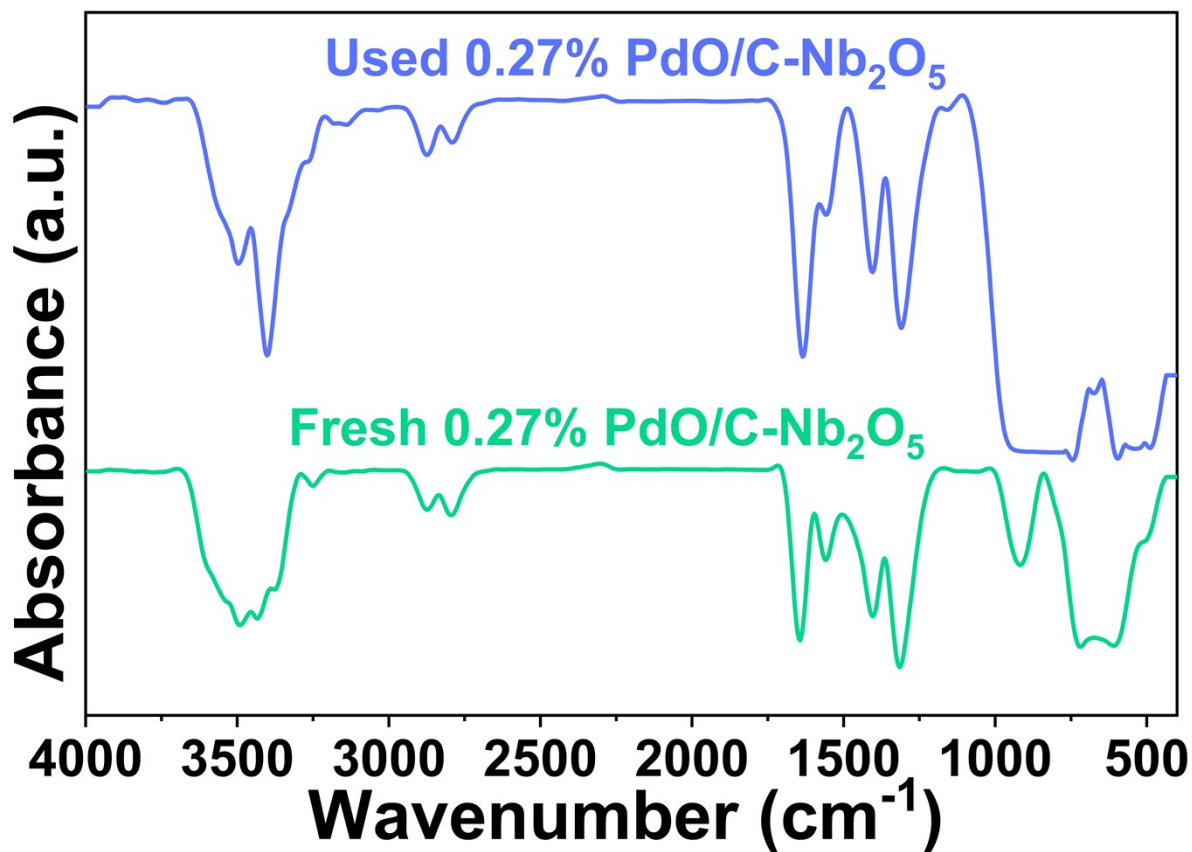

Figure S5 FT-IR spectra of fresh and used PdO/C-Nb<sub>2</sub>O<sub>5</sub>.

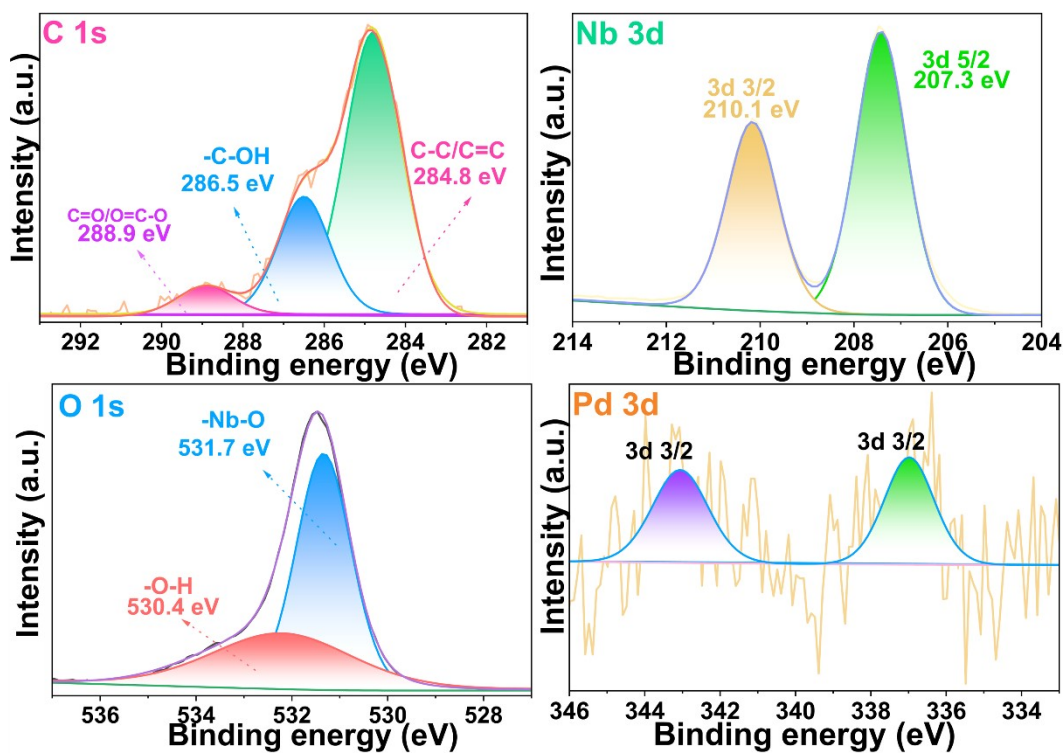

Figure S6 XPS spectra of used PdO/C-Nb<sub>2</sub>O<sub>5</sub>.

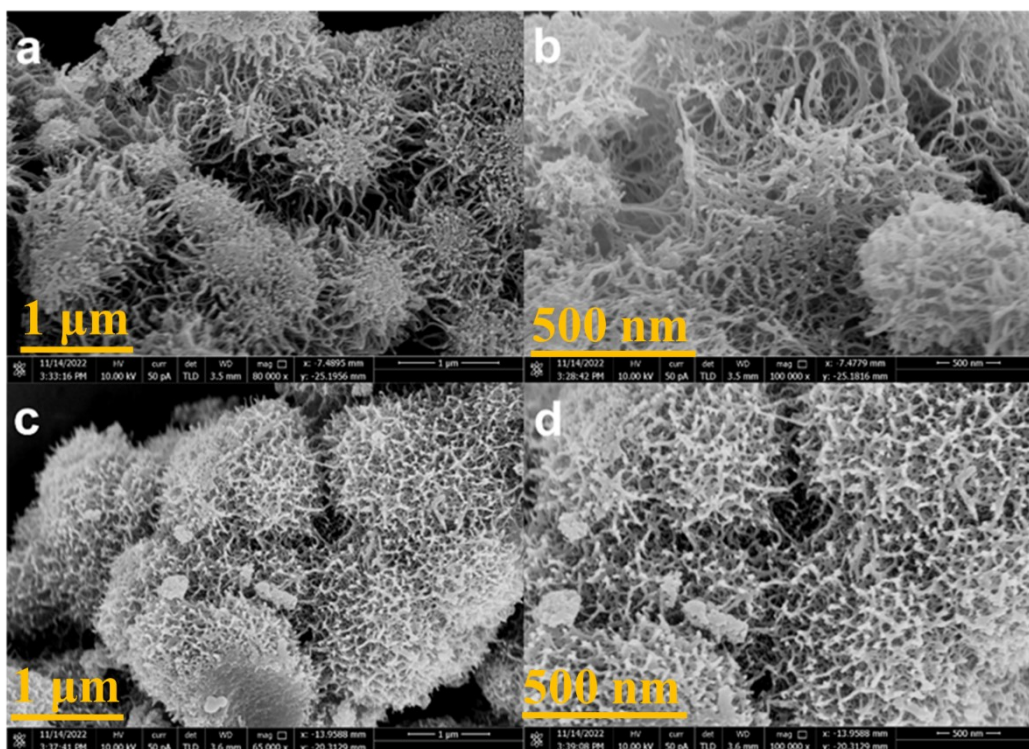

**Figure S7** TEM images of the fresh (a, b) and used (c, d) 0.27% PdO/C-Nb<sub>2</sub>O<sub>5</sub>.

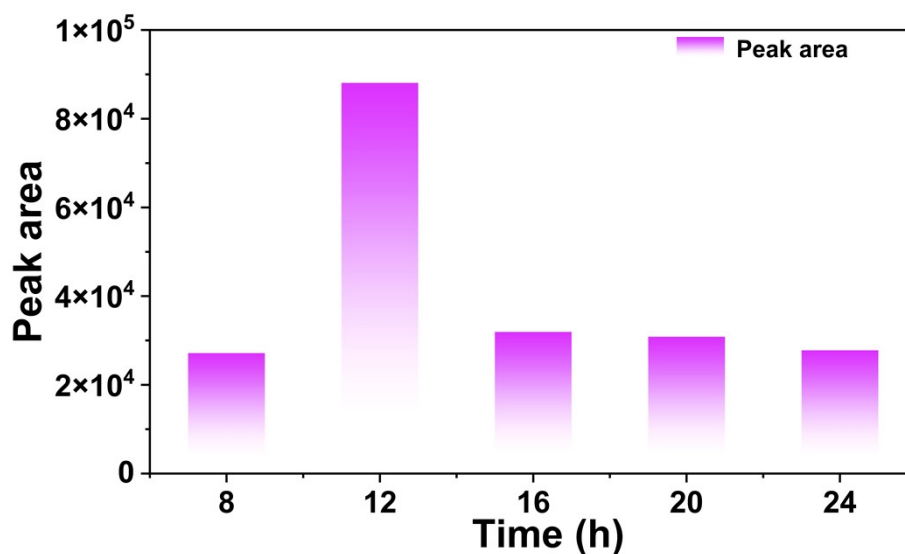

**Figure S8** 1-Phenylethanol peak area change diagram against time during the reaction. Reaction conditions: substrate (20 mmol), 100 mg of catalyst, 1 atm of oxygen, 10 W blue LED lamp  $\lambda=400-405$  nm, room temperature.

The conclusion of consecutive reaction was based on the fact that the 1-phenylethanol was detected and the amount of 1-phenylethanol was determined. The amount of the 1-phenylethanol was roughly determined by the peak area of HPLC due to the content was too low. As shown in Fig. S8, it can be found that the amount of 1-phenylethanol was first increase and the decrease with the reaction undergoing, which was the typical characteristic of reaction intermediate compound in the consecutive reaction. Therefore, we postulated the reaction was a consecutive reaction and the 1-phenylethanol was the intermediate.

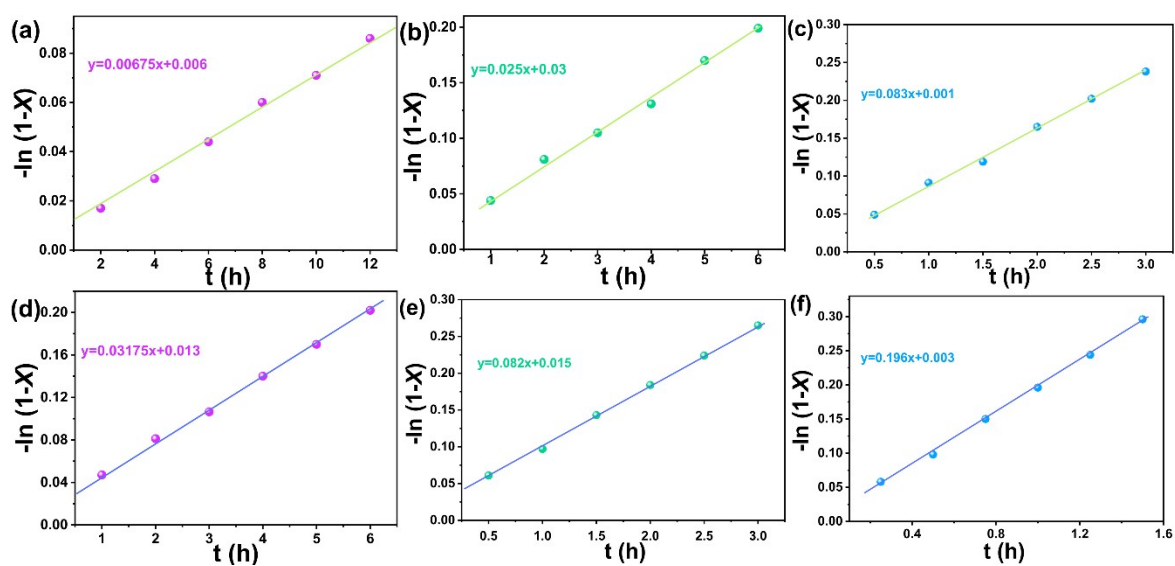

**Figure S9** Kinetic study for the conversion of (a-c) ethyl benzene, and (d-f) 1-phenylethanol over  $\text{Nb}_2\text{O}_5\text{-P}$  (a, d),  $\text{C-Nb}_2\text{O}_5$  (b, e), and  $0.27\% \text{ PdO/C-Nb}_2\text{O}_5$  (c, f). Reaction conditions: substrate (20 mmol), 100 mg of catalyst, 1 atm of oxygen, 10 W blue LED lamp  $\lambda=400\text{-}405$  nm, room temperature.

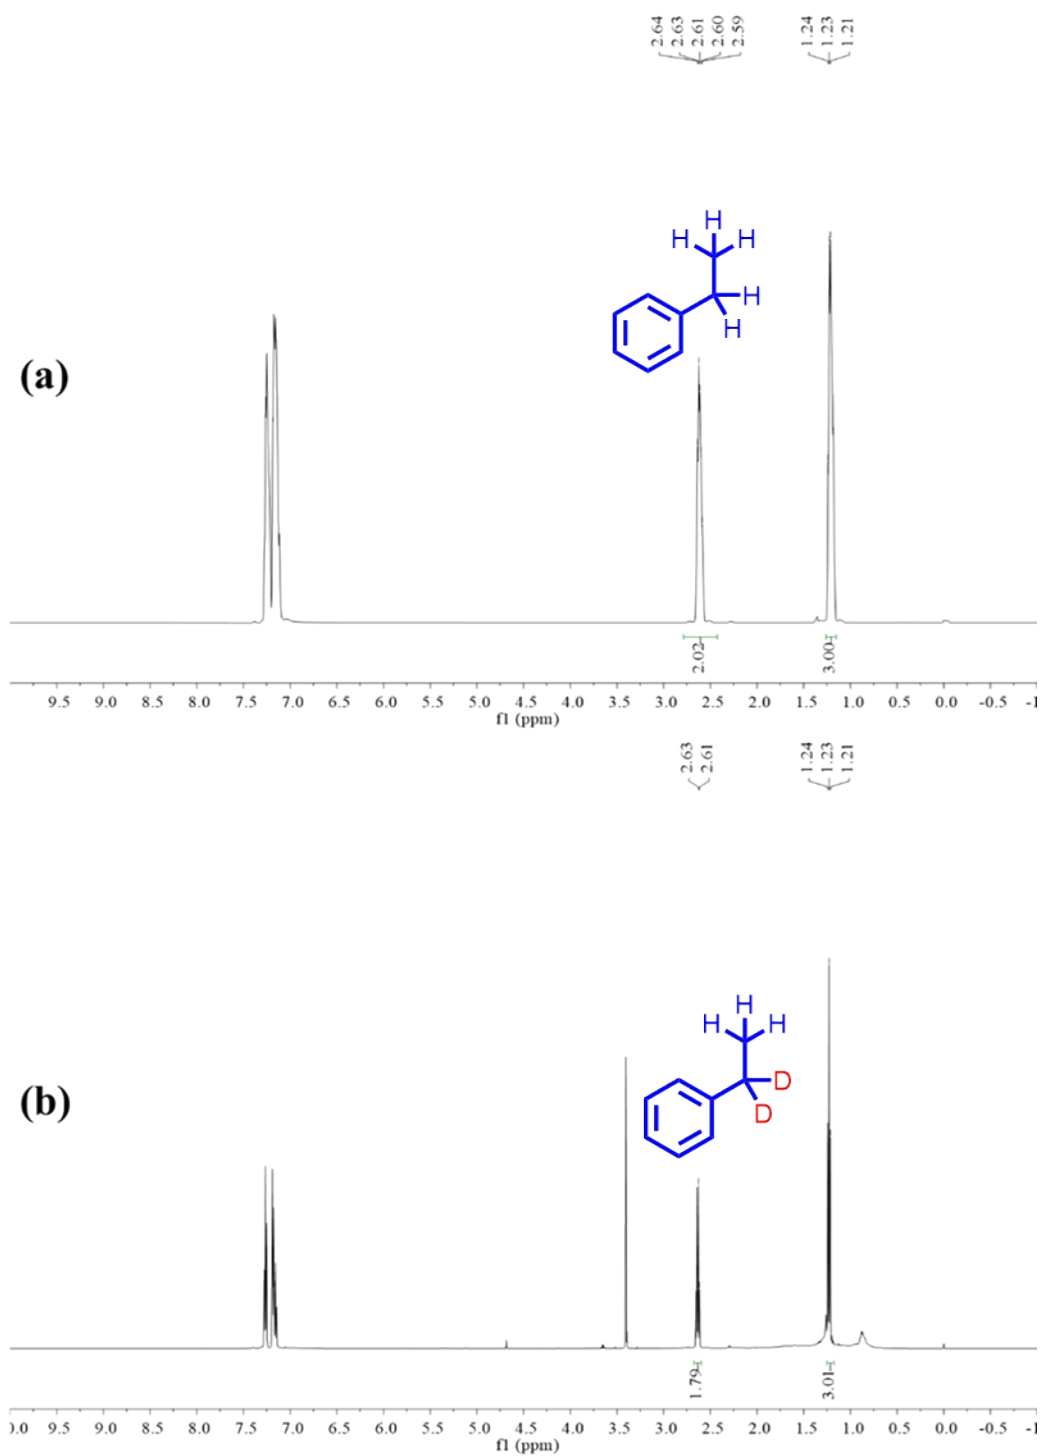

**Figure S10** <sup>1</sup>H NMR spectra of the pure ethylbenzene (a) and ethylbenzene exchanged by H and D (b) Reaction conditions: ethylbenzene 5 mmol, catalyst 100 mg, 2 mL CD<sub>3</sub>OD, 0.1 atm N<sub>2</sub>, 25 °C, blue LED light (10 W, λ = 400–405 nm), and a stirring speed of 1500 rpm. The deuterated solvent is CDCl<sub>3</sub>, 600 MHz NMR spectrometer.

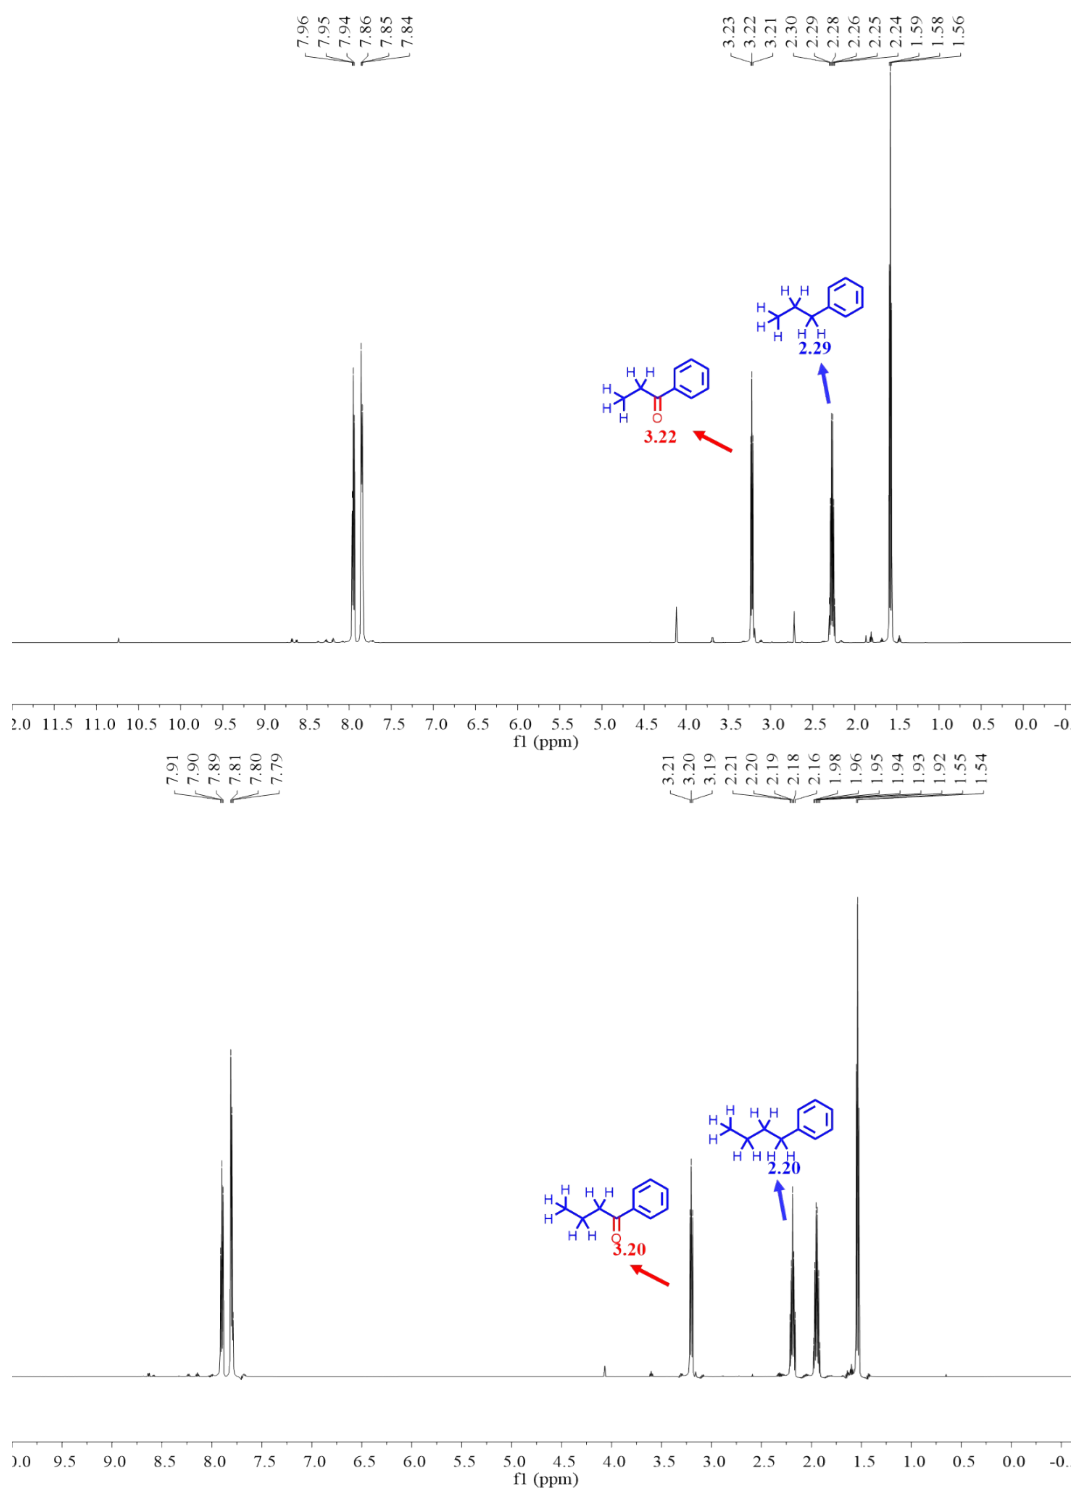

**Figure S11**  $^1\text{H}$  NMR spectra of the propylene and butylbenzene product mixtures  
 Reaction conditions: substrate 20 mmol, catalyst 100 mg, oxygen pressure 0.1 atm, 25 °C, blue LED light (10 W,  $\lambda = 400\text{--}405$  nm), and a stirring speed of 1500 rpm. The deuterated solvent is  $\text{DMSO-}d_6$ , 600 MHz NMR spectrometer.

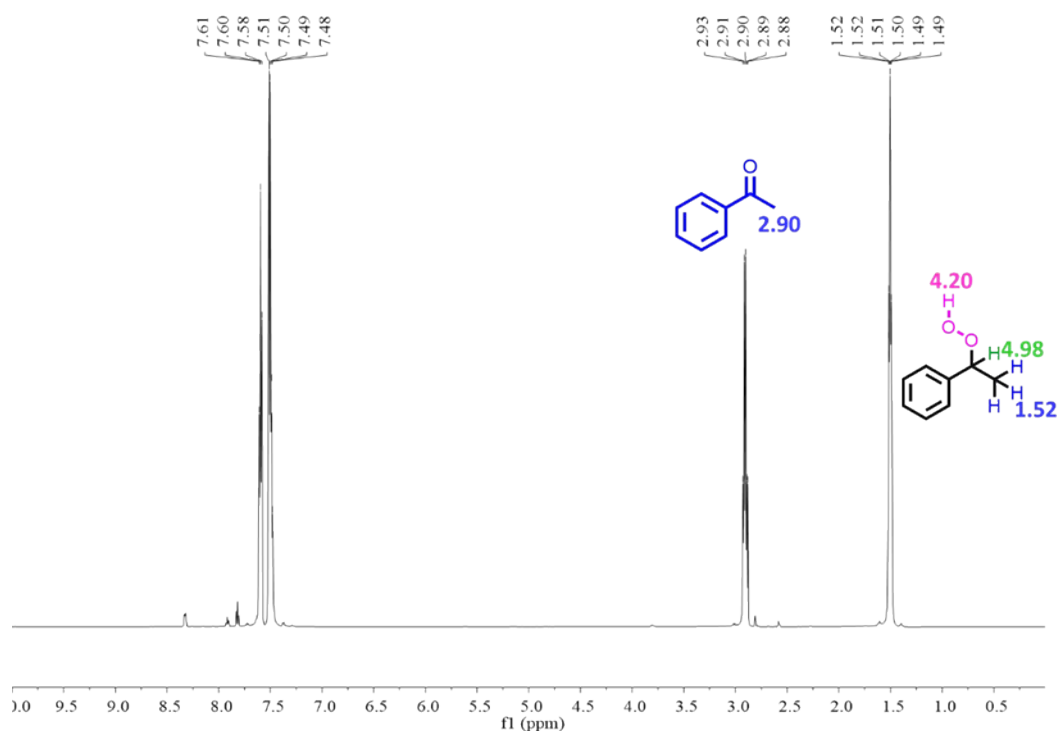

**Figure S12**  $^1\text{H}$  NMR spectra of the product mixtures

Reaction conditions: substrate 20 mmol, catalyst 100 mg, oxygen pressure 0.1 atm, 25 °C, blue LED light (10 W,  $\lambda = 400\text{--}405$  nm), and a stirring speed of 1500 rpm. The deuterated solvent is DMSO- $d_6$ , 600 MHz NMR spectrometer.

The reacted mixture obtained under standard conditions was detected by  $^1\text{H}$  NMR using DMSO- $d_6$  as solvent. The  $^1\text{H}$  NMR spectrum was shown in Fig. S12. The H in the peroxide was expected to be located at 4.20 ppm, H on the benzyl group was expected to be at 4.98 ppm, and H on the methyl was expected to be at 1.52 ppm. However, the H peak in the peroxide position was not detected in the  $^1\text{H}$  NMR spectrum (Fig. S12), which may be because the peroxide was unstable and difficult to exist stably.



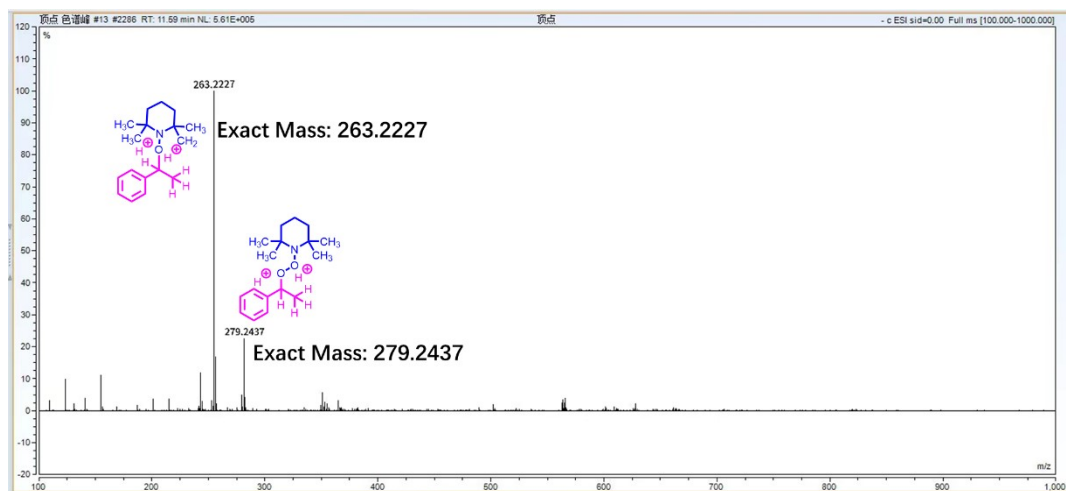

**Figure S13** Mechanistic experiments

Reaction conditions: substrate 20 mmol, catalyst 100 mg, TEMPO 1 mmol, oxygen pressure 0.1 atm, 25 °C, blue LED light (10 W,  $\lambda = 400\text{--}405$  nm), and a stirring speed of 1500 rpm. HPLC-MS determination.

## 4. REFERENCES

- 1 S. Samanta, S. Khilari, R. Srivastava, *ACS Appl. Nano Mater.*, 2017, **1**, 426-441.
- 2 S. Verma, R.B. Nasir Baig, M.N. Nadagouda, R.S. Varma, P, *ACS Sustain. Chem. Eng.*, 2016, **4**, 2333-2336.
- 3 P. Chen, Y. Li, C. Xiao, L. Chen, J.-K. Guo, S. Shen, C.-T. Au, S.-F. Yin, *ACS Sustain. Chem. Eng.*, 2019, **7**, 17500-17506.
- 4 Y. Wang, P. Li, J. Wang, Z. Liu, Y. Wang, Y. Lu, Y. Liu, L. Duan, W. Li, S. Sarina, H. Zhu, J. Liu, *Catal. Sci. Technol.*, 2021, **11**, 4429-4438.
- 5 Y. Bian, Y. Gu, X. Zhang, H. Chen, Z. Li, *Chin. Chem. Lett.*, 2021, **32**, 2837-2840.
- 6 B. Srinivas, P. Anil Kumar Reddy, M. Rajesh, V. Durga Kumari, M. Subrahmanyam, B. R. De, *Res. Chem. Intermediat.*, 2011, **37**, 901-918.
- 7 X. Cao, A. Huang, C. Liang, H. C. Chen, T. Han, R. Lin, Q. Peng, Z. Zhuang, R. Shen, H. M. Chen, Y. Yu, C. Chen, Y. Li, *J. Am. Chem. Soc.*, 2022, **144**, 3386-3397.
- 8 L. Ni, J. Ni, Y. Lv, P. Yang, Y. Cao, *Chem. Commun.*, 2009, 2171-2173.
- 9 J. Li, S. Zhao, S.-Z. Yang, S. Wang, H. Sun, S.P. Jiang, B. Johannessen, S. Liu, *J. Mater. Chem. A*, 2021, **9**, 3029-3035.
- 10 X. Cheng, J. Zhang, L. Liu, L. Zheng, F. Zhang, R. Duan, Y. Sha, Z. Su, F. Xie, *Green Chem.*, 2021, **23**, 1165-1170.
- 11 S.K. Pahari, P. Pal, D.N. Srivastava, S. Ghosh, A.B. Panda, *Chem. Commun.*, 2015, **51**, 10322-10325.
- 12 S. Furukawa, T. Shishido, K. Teramura, T. Tanaka, *J. Phys. Chem. C*, 2011, **115**, 19320-19327.
- 13 L. Kalita, L. Saikia, *ChemistrySelect*, 2020, **5**, 4848-4855.
- 14 M. Hosseini-Sarvari, A. Dehghani, *New J. Chem.*, 2020, **44**, 16776-16785.
- 15 M.M. Peng, M. Ganesh, R. Vinodh, M. Palanichamy, H.T. Jang, *Arab. J. Chem.*, 2019, , 1358-1364.
- 16 M. Du, G. Zeng, J. Huang, D. Sun, Q. Li, G. Wang, X. Li, *ACS Sustain. Chem. Eng.*, 2019, **7**, 9717-9726.
- 17 W. Feng, G. Wu, L. Li, N. Guan, *Green Chem.*, 2011, **13**, 3265-3272.
- 18 M. Du, G. Zeng, C. Ye, H. Jin, J. Huang, D. Sun, Q. Li, B. Chen, X. Li, *Mol. Catal.*, 2020, **483**, 110771.
- 19 S. Furukawa, A. Tamura, T. Shishido, K. Teramura, T. Tanaka, *Appl. Catal. B Environ.*, 2011, **110**, 216-220.
- 20 K. Imamura, H. Tsukahara, K. Hamamichi, N. Seto, K. Hashimoto, H. Kominami, *Appl. Catal. A Gen.*, 2013, **450**, 28-33.
- 21 X. Jiang, W. Wang, H. Wang, Z.-H. He, Y. Yang, K. Wang, Z.-T. Liu, B. Han, *Green Chem.*, 2022, **24**, 7652-7660.
- 22 P. Chen, L. Chen a, Y. Zeng, F. Ding, X. Jiang, N. Liu, C.-T. Au, S.-F. Yin, *Appl. Catal. B Environ.*, 2018, **234**, 311-317.
- 23 J. -X. Li, Y. -Q. Xu, Z. -Z. Ding, A. H. Mahadi, Y.-F. Zhao, Y.-F. Song, *Chem. Eng. J.*, 2020, **388**, 124248
- 24 O. Tomita, B. Ohtani, R. Abe, *Catal. Sci. Technol.*, 2014, **4**, 3850-3860.

- 25 L. -Y. Zhang, Q. Hou, Y. Zhou, J. Wang, *Mol Cat.*, 2019, **473**, 110397.
- 26 Z. -R. Wang, H. Hojo, H. Einaga, *Mol Cat.*, 2021, **515**, 111933.
- 27 Y. -Q. Gu, Q. Li, D. -J. Zang, Y. -C. Huang, H. Yu, Y. -G. Wei, *Angew. Chem. Int. Ed.*, 2021, 60, 13310-13316.
- 28 D. -K. Wang, M. -T. Wang, Z. -H. Li, *ACS Catal.*, 2015, **5**, 6852-6857.
- 29 P. Basyach, A. K. Guha, S. Borthakur, L. Kalita, P. Chetia, K. Sonowal, L. Saikia, *J. Mater. Chem. A*, 2020, **8**, 12774-12789.
- 30 S. Samanta, R. Srivastava, *Appl. Catal. B Environ.*, 2017, **218**, 621-636.
- 31 L. -J. Sun, D.-X. Wang, Y. -X. Li, B.-G. Wu, Q. Li, C. Wang, S. Wang, B. -J. Jiang, *Chin. Chem. Lett.*, 2023, **34**, 107490.

## 5. NMR DATA

### Acetophenone

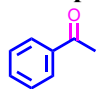

$^1\text{H}$  NMR (400 MHz, Chloroform-*d*)  $\delta$  7.94 (d,  $J = 7.3$  Hz, 2H), 7.53 (d,  $J = 7.3$  Hz, 1H), 7.44 (t,  $J = 7.6$  Hz, 2H), 2.58 (s, 3H).  $^{13}\text{C}$  NMR (101 MHz, Chloroform-*d*)  $\delta$  198.01, 137.20, 133.04, 128.41 (d,  $J = 26.9$  Hz), 26.51.

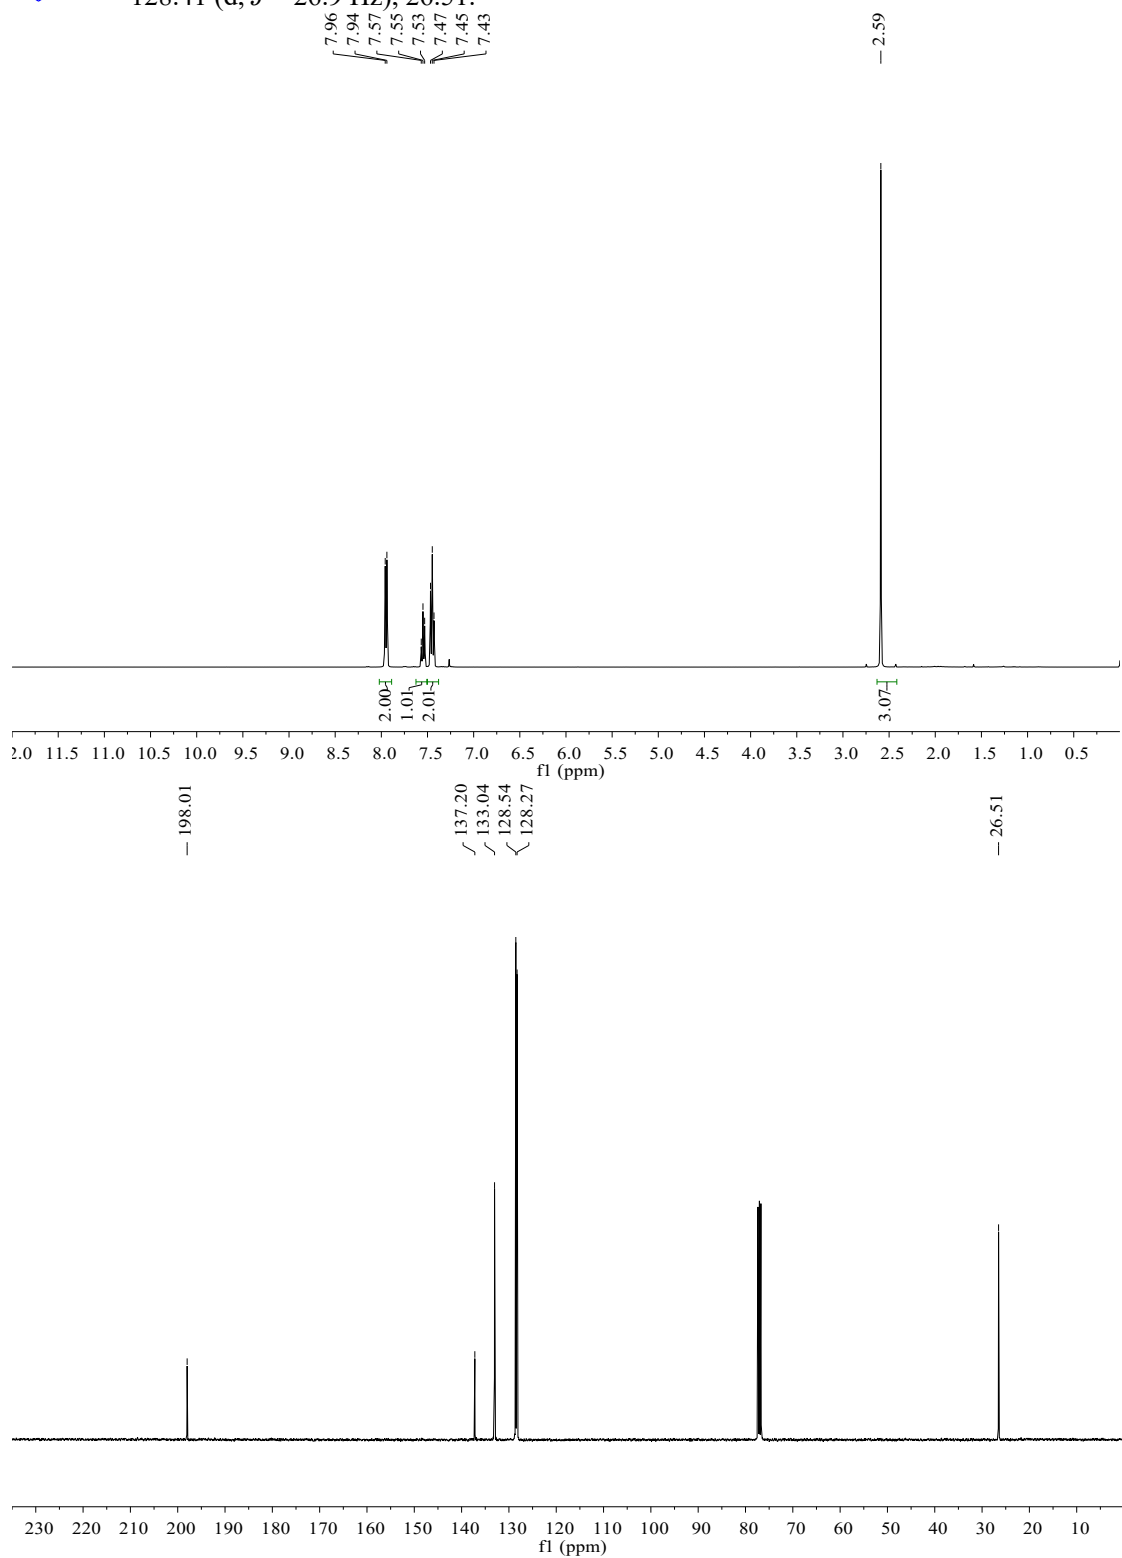

Figure S14  $^1\text{H}$  and  $^{13}\text{C}$  NMR spectrogram of acetophenone

## 2-Methylacetophenone

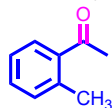

$^1\text{H}$  NMR (600 MHz, Chloroform-*d*)  $\delta$  7.68 (dd,  $J = 7.7, 1.1$  Hz, 1H), 7.36 (dd,  $J = 7.5, 1.3$  Hz, 1H), 7.30 – 7.16 (m, 2H), 2.57 (s, 3H), 2.53 (s, 3H).  $^{13}\text{C}$  NMR (151 MHz, Chloroform-*d*)  $\delta$  201.70, 138.39, 137.66, 132.04, 131.51, 129.36, 125.70, 29.52, 21.57.

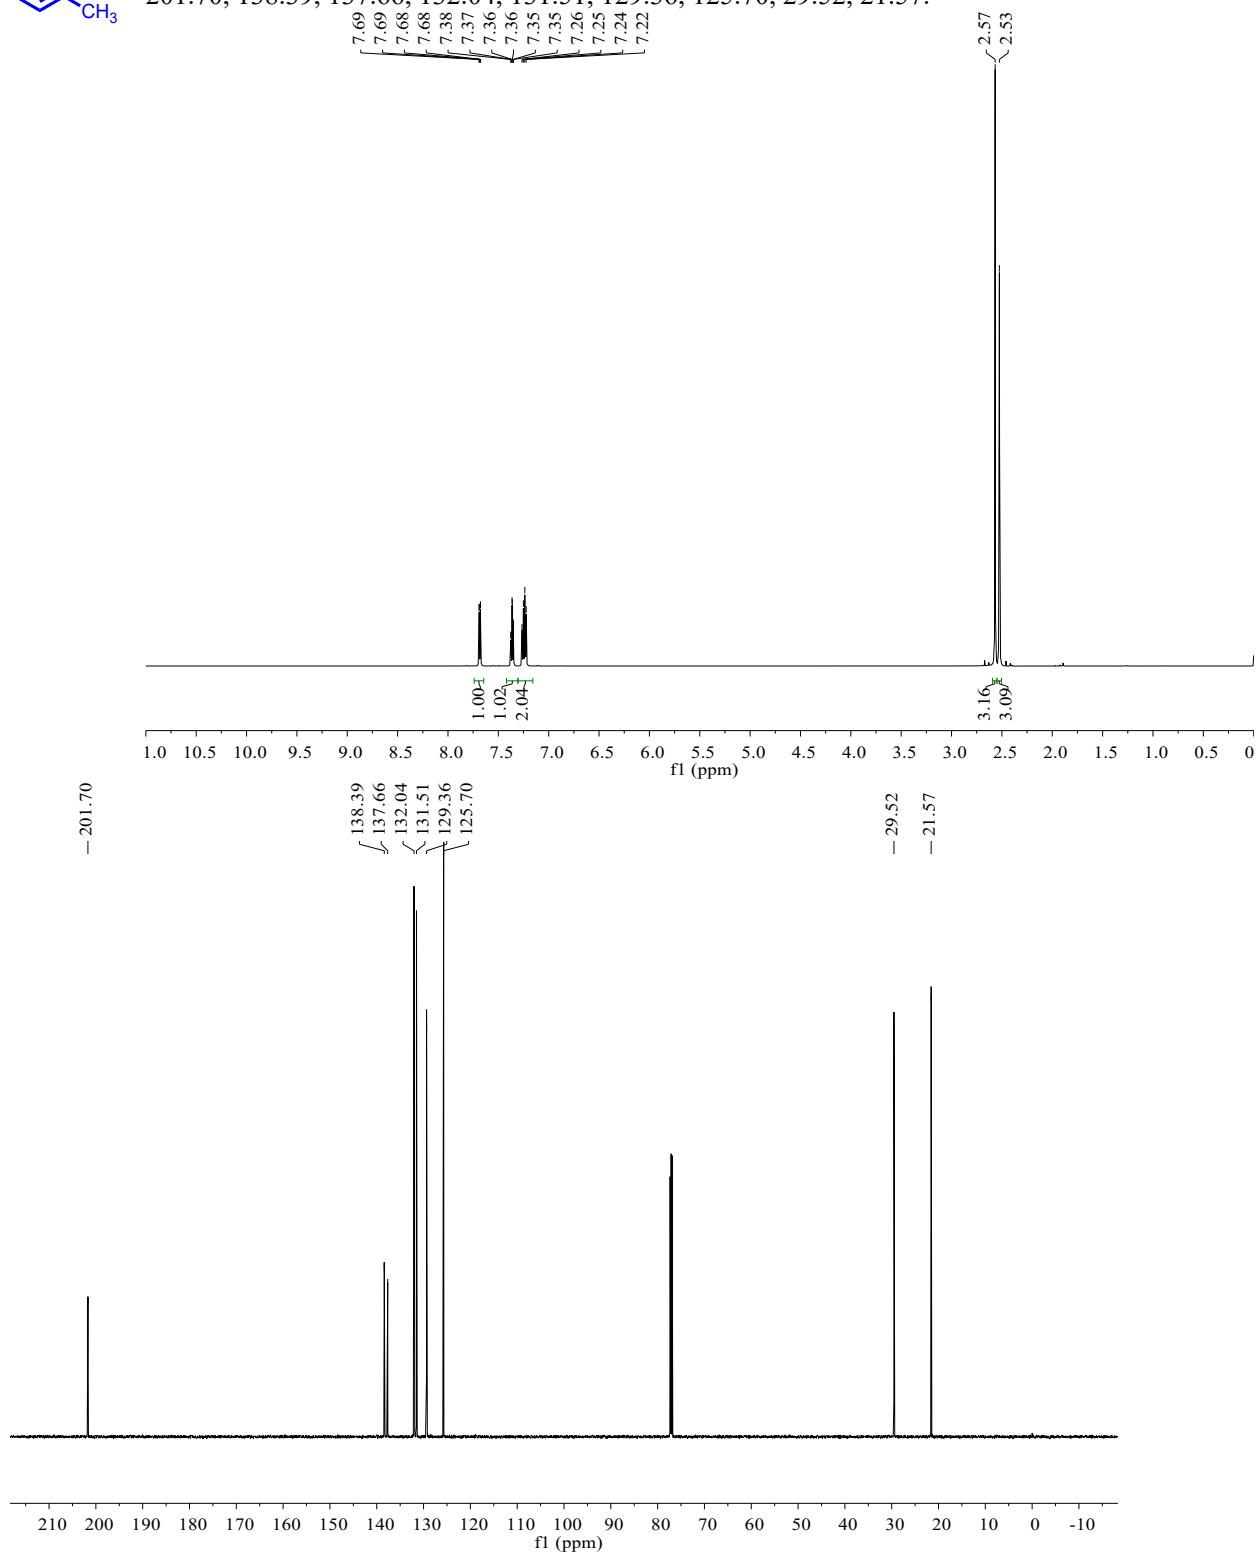

Figure S15  $^1\text{H}$  and  $^{13}\text{C}$  NMR spectrogram of 2-methylacetophenone

### 3-Methylacetophenone

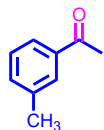

$^1\text{H}$  NMR (600 MHz, Chloroform-*d*)  $\delta$  8.00 – 7.61 (m, 2H), 7.35 (dt,  $J = 15.0, 7.5$  Hz, 2H), 2.58 (s, 3H), 2.40 (s, 3H).  $^{13}\text{C}$  NMR (151 MHz, Chloroform-*d*)  $\delta$  198.36, 138.34, 137.18, 133.85, 128.78, 128.44, 125.58, 26.64, 21.31.

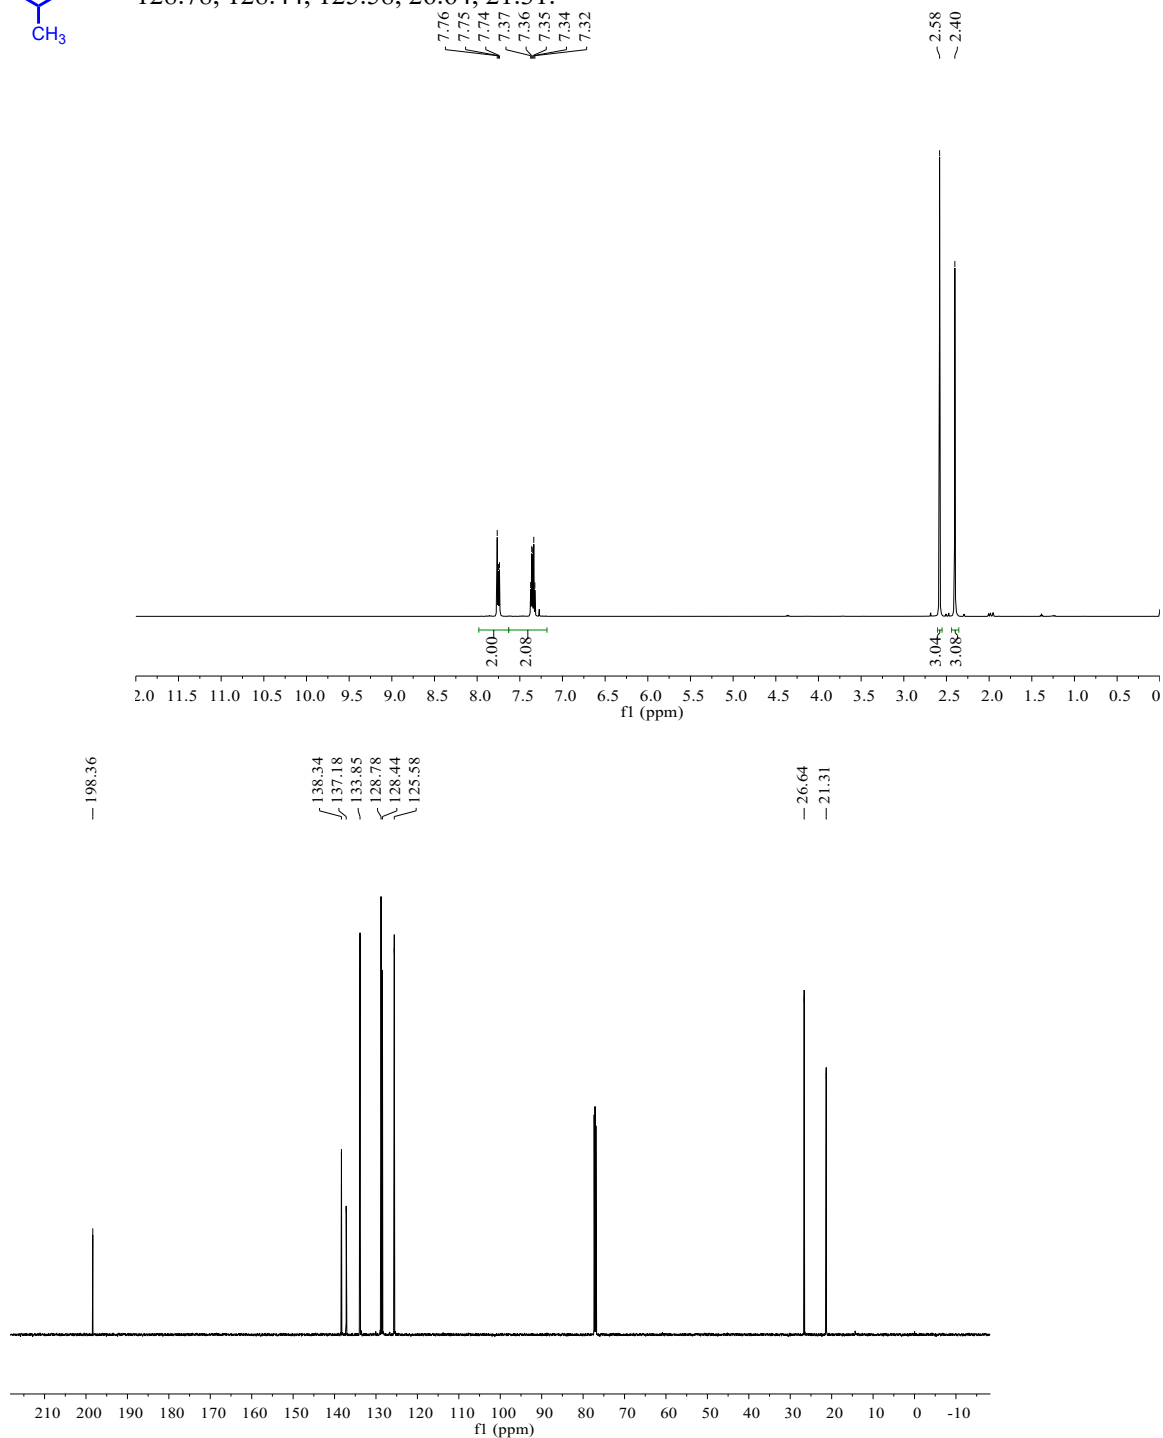

Figure S16  $^1\text{H}$  and  $^{13}\text{C}$  NMR spectrogram of 3-methylacetophenone

### 4-Methylacetophenone

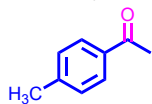

$^1\text{H}$  NMR (600 MHz, Chloroform-*d*)  $\delta$  7.85 (d,  $J = 8.2$  Hz, 2H), 7.25 (d,  $J = 8.0$  Hz, 2H), 2.56 (s, 3H), 2.40 (s, 3H).  $^{13}\text{C}$  NMR (151 MHz, Chloroform-*d*)  $\delta$  196.75, 163.49, 130.46 (d,  $J = 35.2$  Hz), 113.68, 55.45, 26.30.

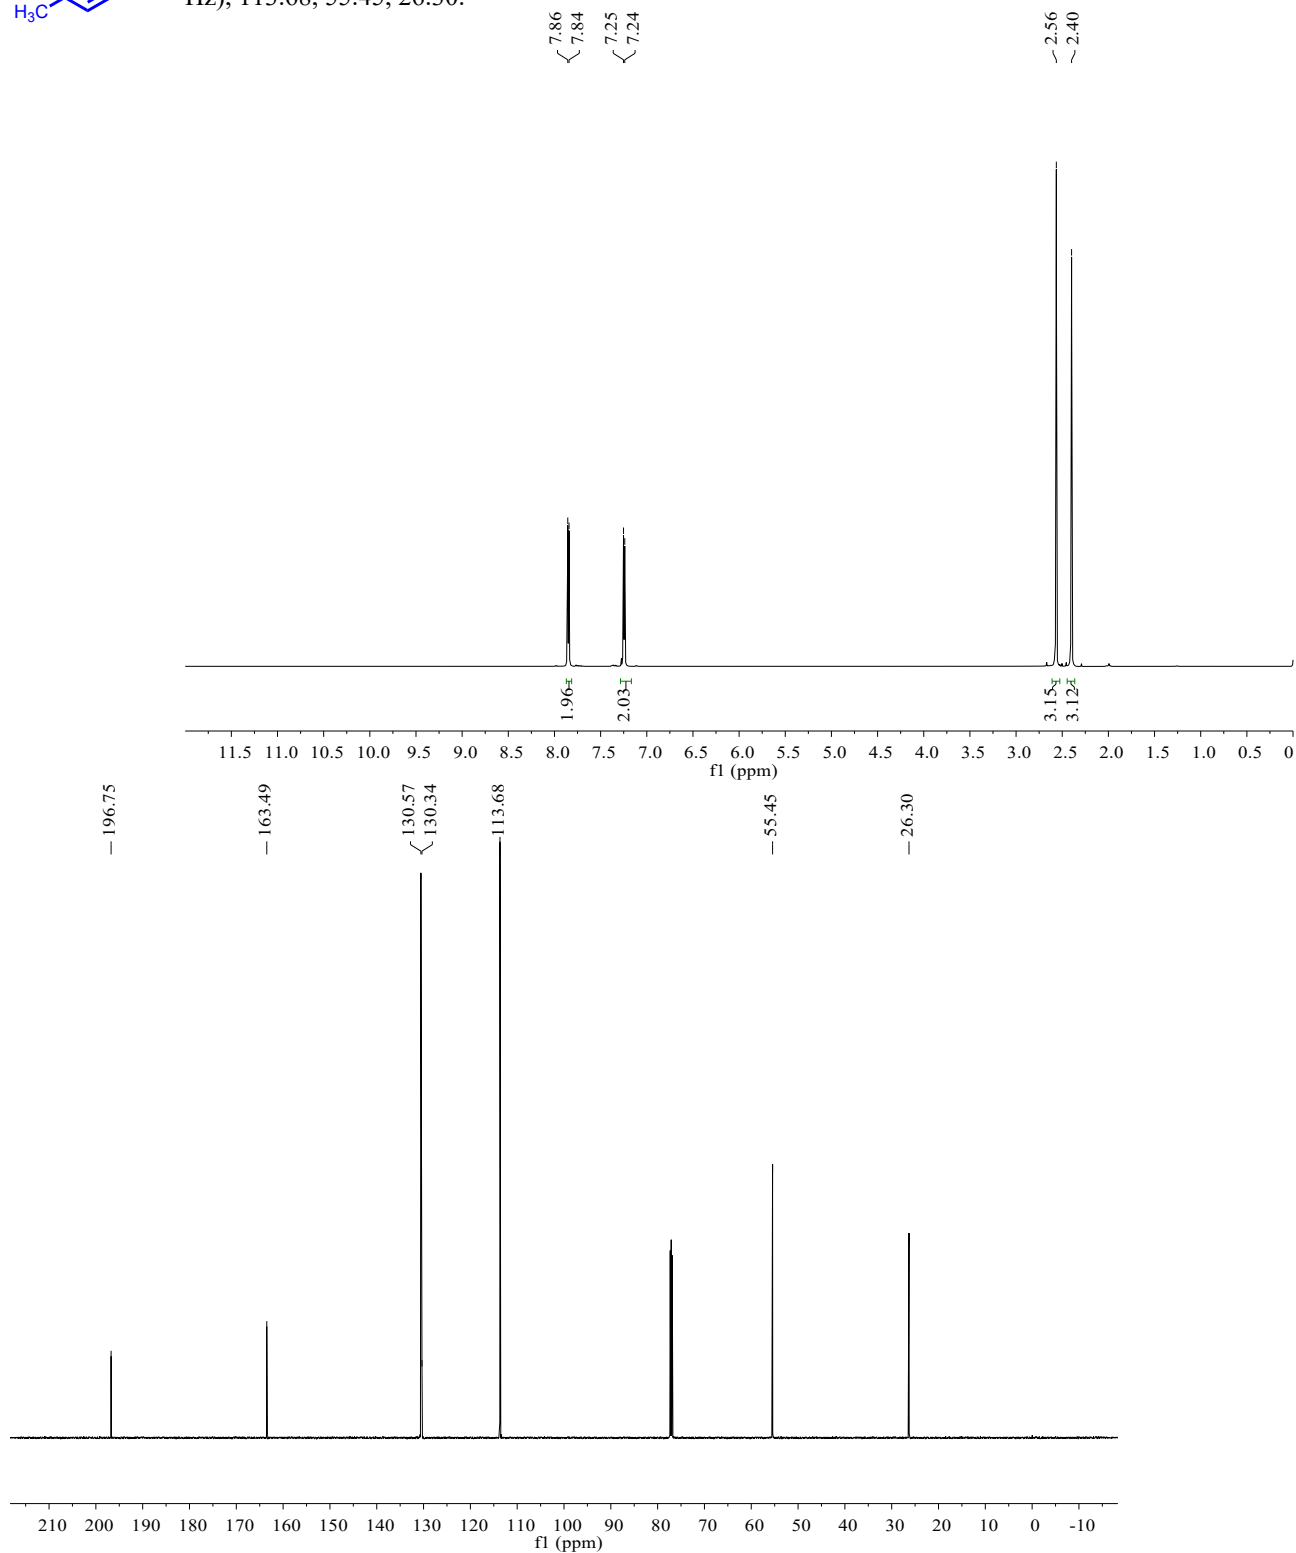

Figure S17  $^1\text{H}$  and  $^{13}\text{C}$  NMR spectrogram of 4-methylacetophenone

#### 4-Methoxy-acetophenone

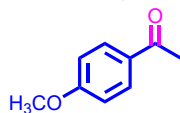

$^1\text{H NMR}$  (600 MHz, Chloroform-*d*)  $\delta$  8.09 (d,  $J = 8.9$  Hz, 2H), 7.08 (d,  $J = 8.9$  Hz, 2H), 4.01 (s, 3H), 2.70 (s, 3H).  $^{13}\text{C NMR}$  (151 MHz, Chloroform-*d*)  $\delta$  196.75, 163.49, 130.57, 130.34, 113.68, 55.45, 26.30.

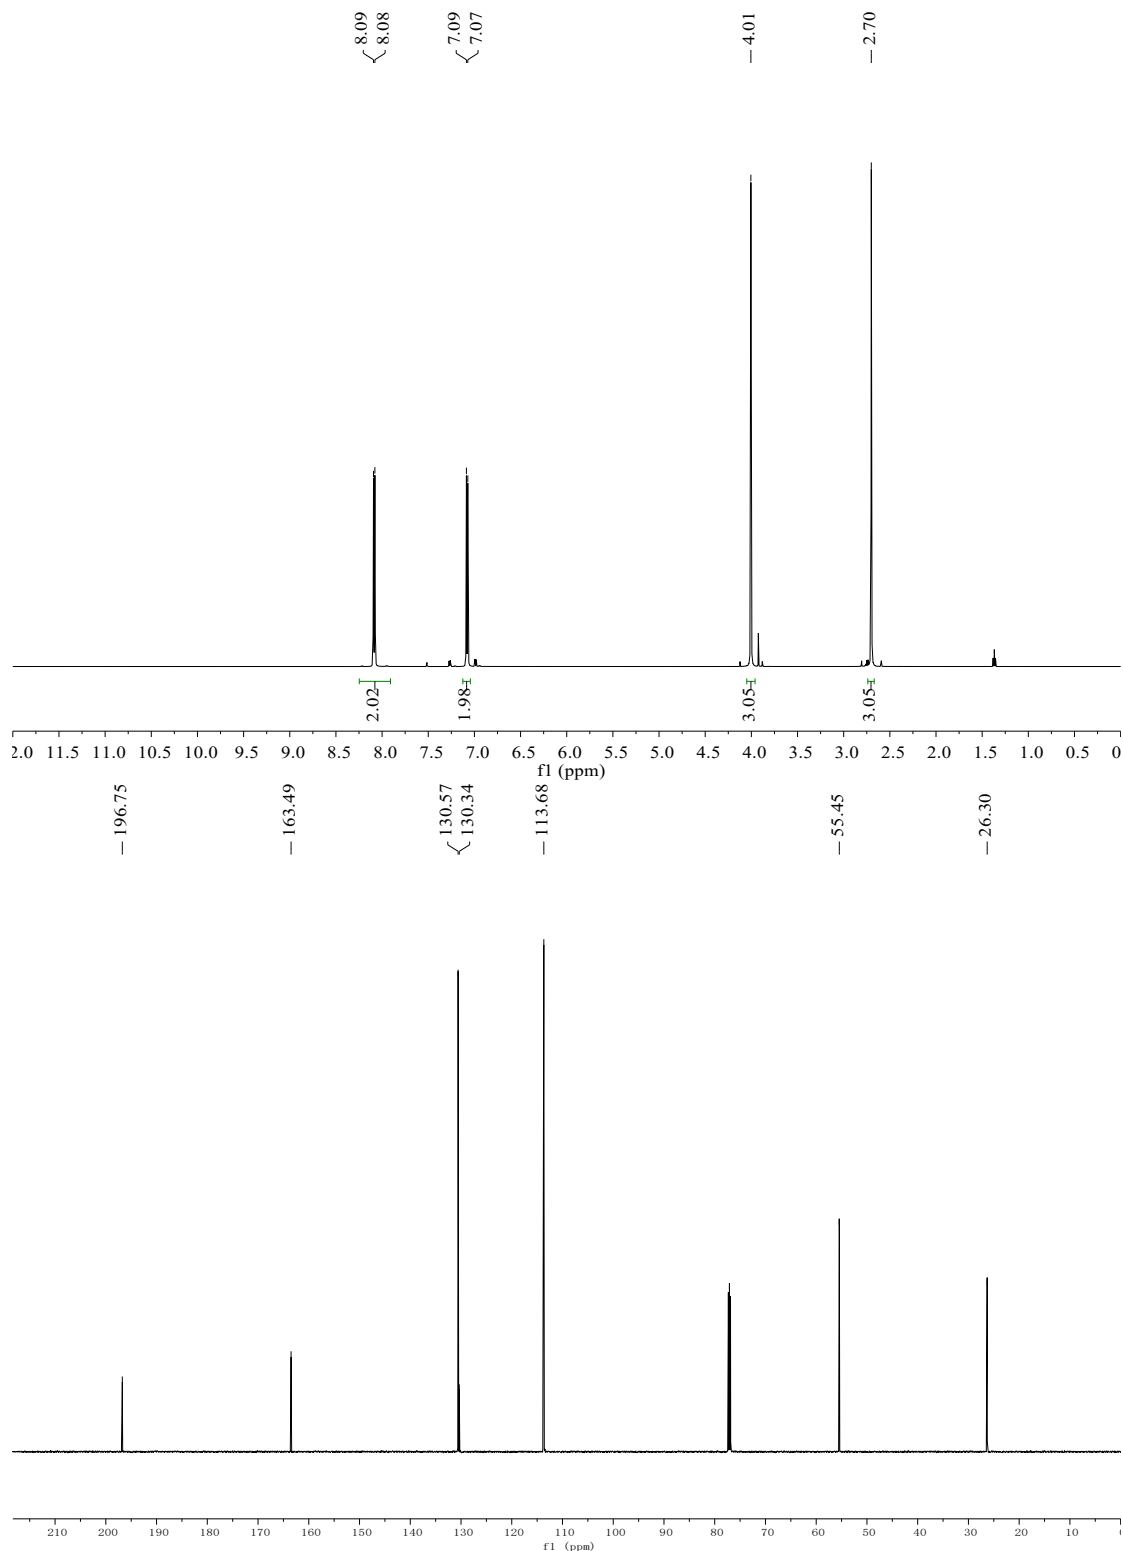

Figure S18  $^1\text{H}$  and  $^{13}\text{C}$  NMR spectrogram of 4-methoxy-acetophenone



#### 4-Hydroxyacetophenone

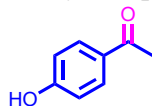

$^1\text{H NMR}$  (600 MHz,  $\text{DMSO-}d_6$ )  $\delta$  10.33 (s, 1H), 7.84 (d,  $J = 8.7$  Hz, 2H), 6.86 (d,  $J = 8.7$  Hz, 2H), 2.48 (s, 3H).  $^{13}\text{C NMR}$  (151 MHz,  $\text{DMSO-}d_6$ )  $\delta$  194.01, 159.97, 128.69, 126.56, 113.12, 24.23.

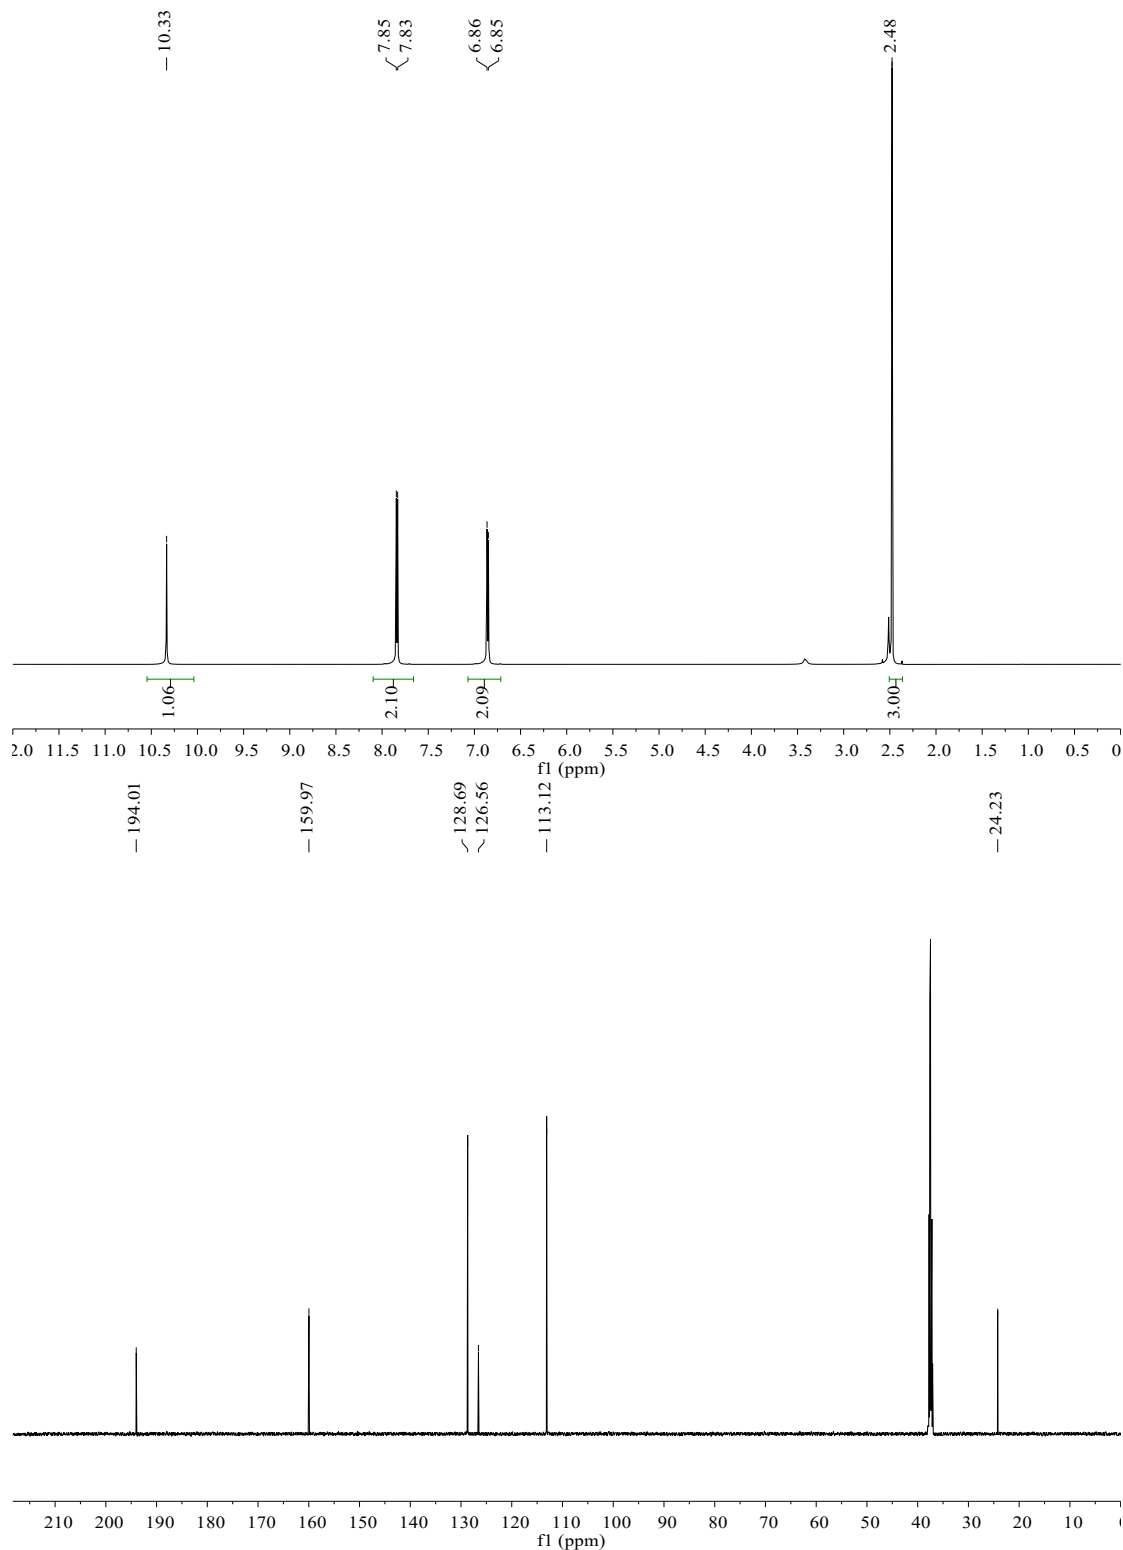

Figure S19  $^1\text{H}$  and  $^{13}\text{C}$  NMR spectrogram of 4-hydroxyacetophenone

## 2-Hydroxyacetophenone

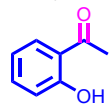

$^1\text{H}$  NMR (600 MHz,  $\text{DMSO-}d_6$ )  $\delta$  11.99 (s, 1H), 7.88 (dd,  $J = 8.1, 1.5$  Hz, 1H), 7.65 – 7.39 (m, 1H), 7.15 – 6.83 (m, 2H), 2.63 (s, 3H).  $^{13}\text{C}$  NMR (151 MHz,  $\text{DMSO-}d_6$ )  $\delta$  202.59, 158.79, 134.26, 129.41, 117.15, 115.54, 25.55.

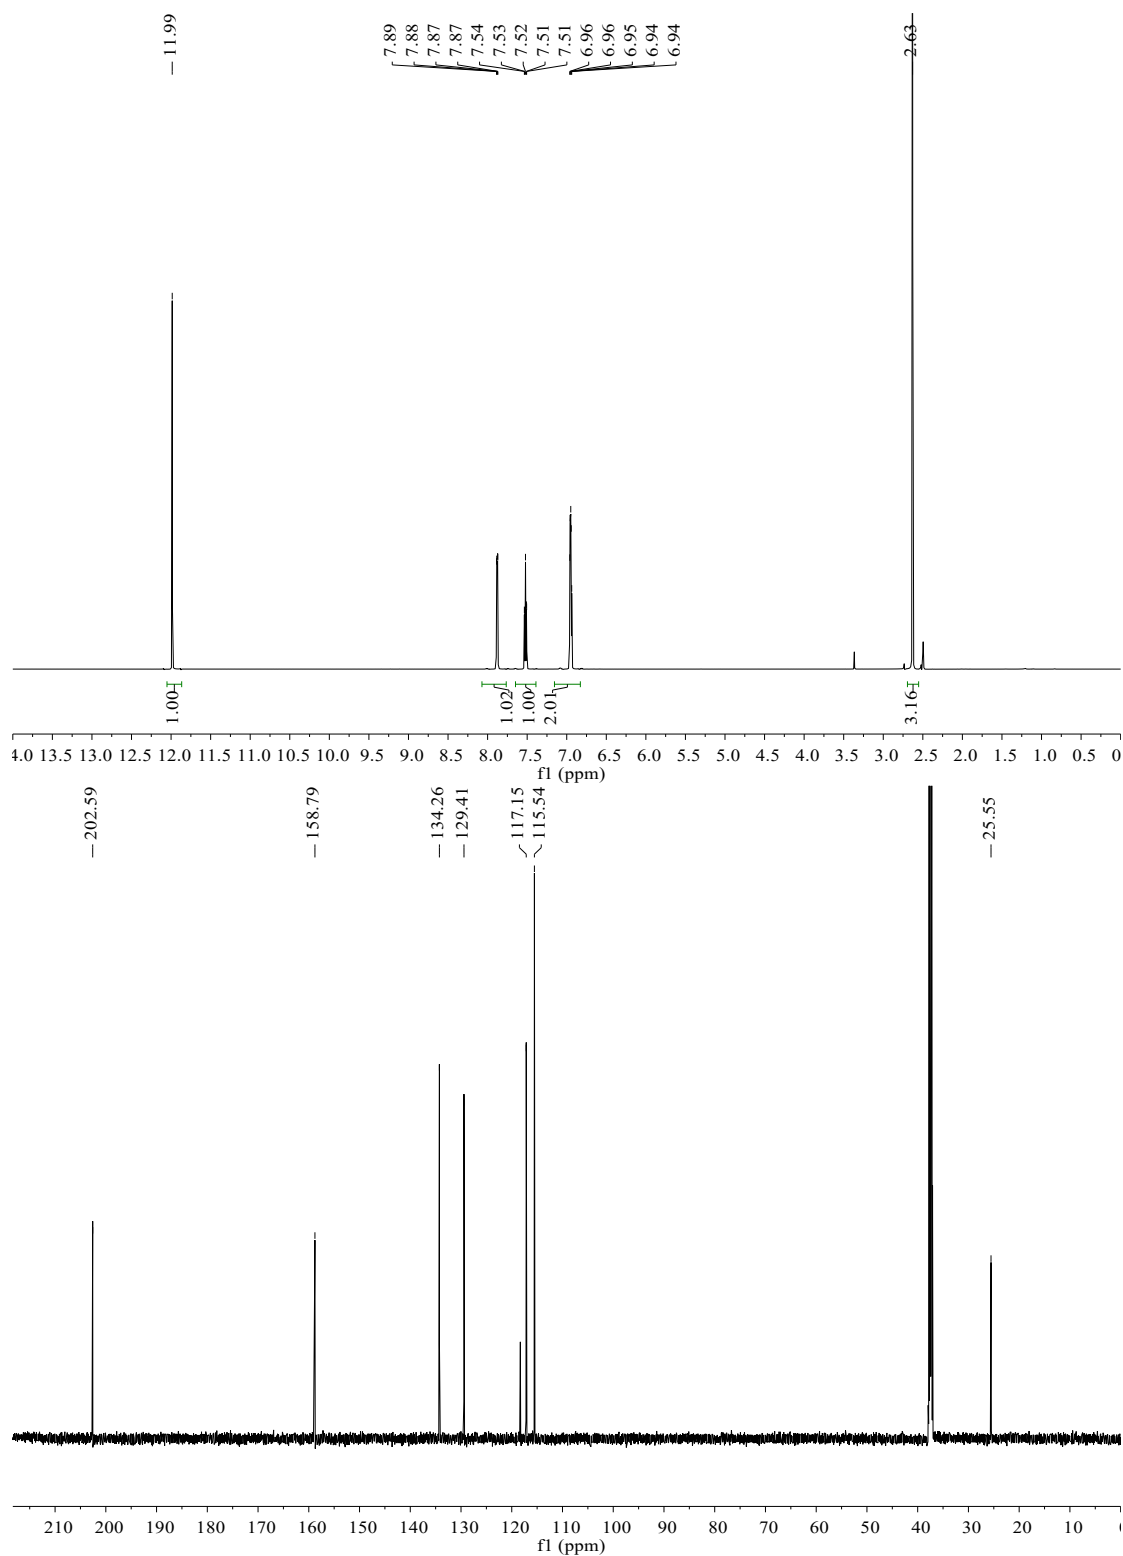

Figure S20  $^1\text{H}$  and  $^{13}\text{C}$  NMR spectrogram of 2-hydroxyacetophenone

## 2-Bromophenone

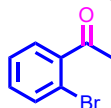

$^1\text{H}$  NMR (600 MHz, Chloroform-*d*)  $\delta$  7.61 (d,  $J = 8.0$  Hz, 1H), 7.46 (dd,  $J = 7.6, 1.6$  Hz, 1H), 7.37 (t,  $J = 7.5$  Hz, 1H), 7.29 (td,  $J = 7.9, 1.7$  Hz, 1H), 2.63 (s, 3H).  $^{13}\text{C}$  NMR (151 MHz, Chloroform-*d*)  $\delta$  201.34, 141.45, 133.84, 131.81, 128.92, 127.46, 118.88, 30.31.

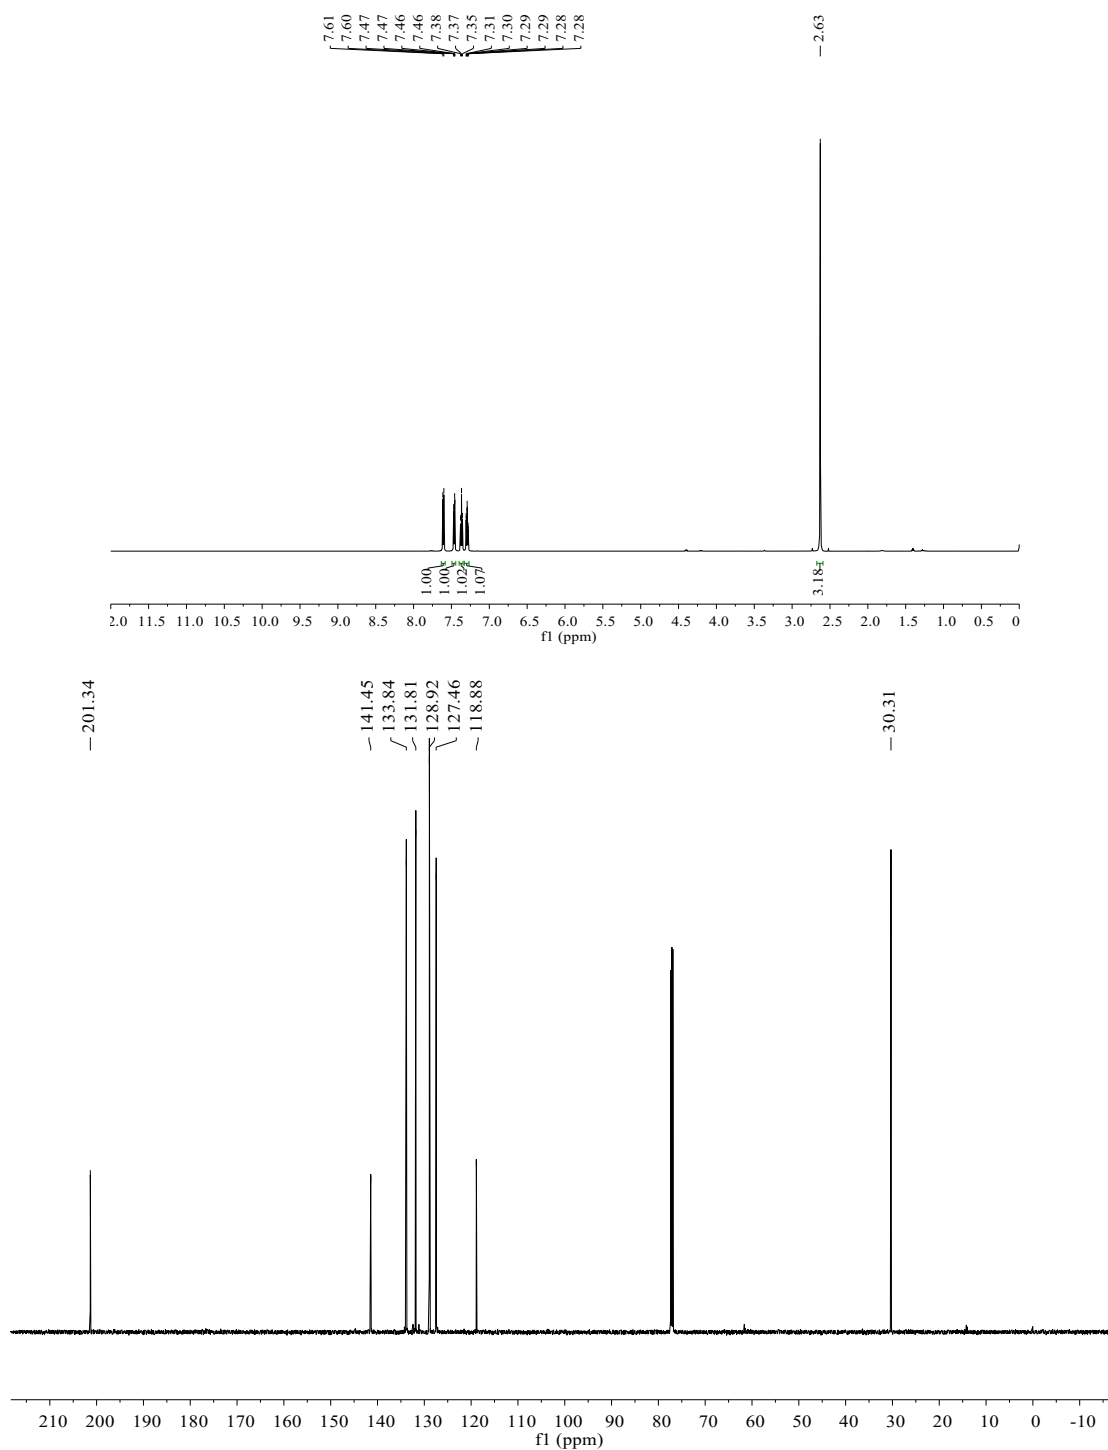

Figure S21  $^1\text{H}$  and  $^{13}\text{C}$  NMR spectrogram of 2-bromophenone

### 4-Bromoacetophenone

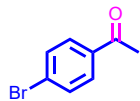

$^1\text{H}$  NMR (600 MHz, Chloroform-*d*)  $\delta$  7.81 (d,  $J = 8.4$  Hz, 2H), 7.60 (d,  $J = 8.4$  Hz, 2H), 2.58 (s, 3H).  $^{13}\text{C}$  NMR (151 MHz, Chloroform-*d*)  $\delta$  196.94, 135.78, 131.83, 129.79, 128.24, 26.47.

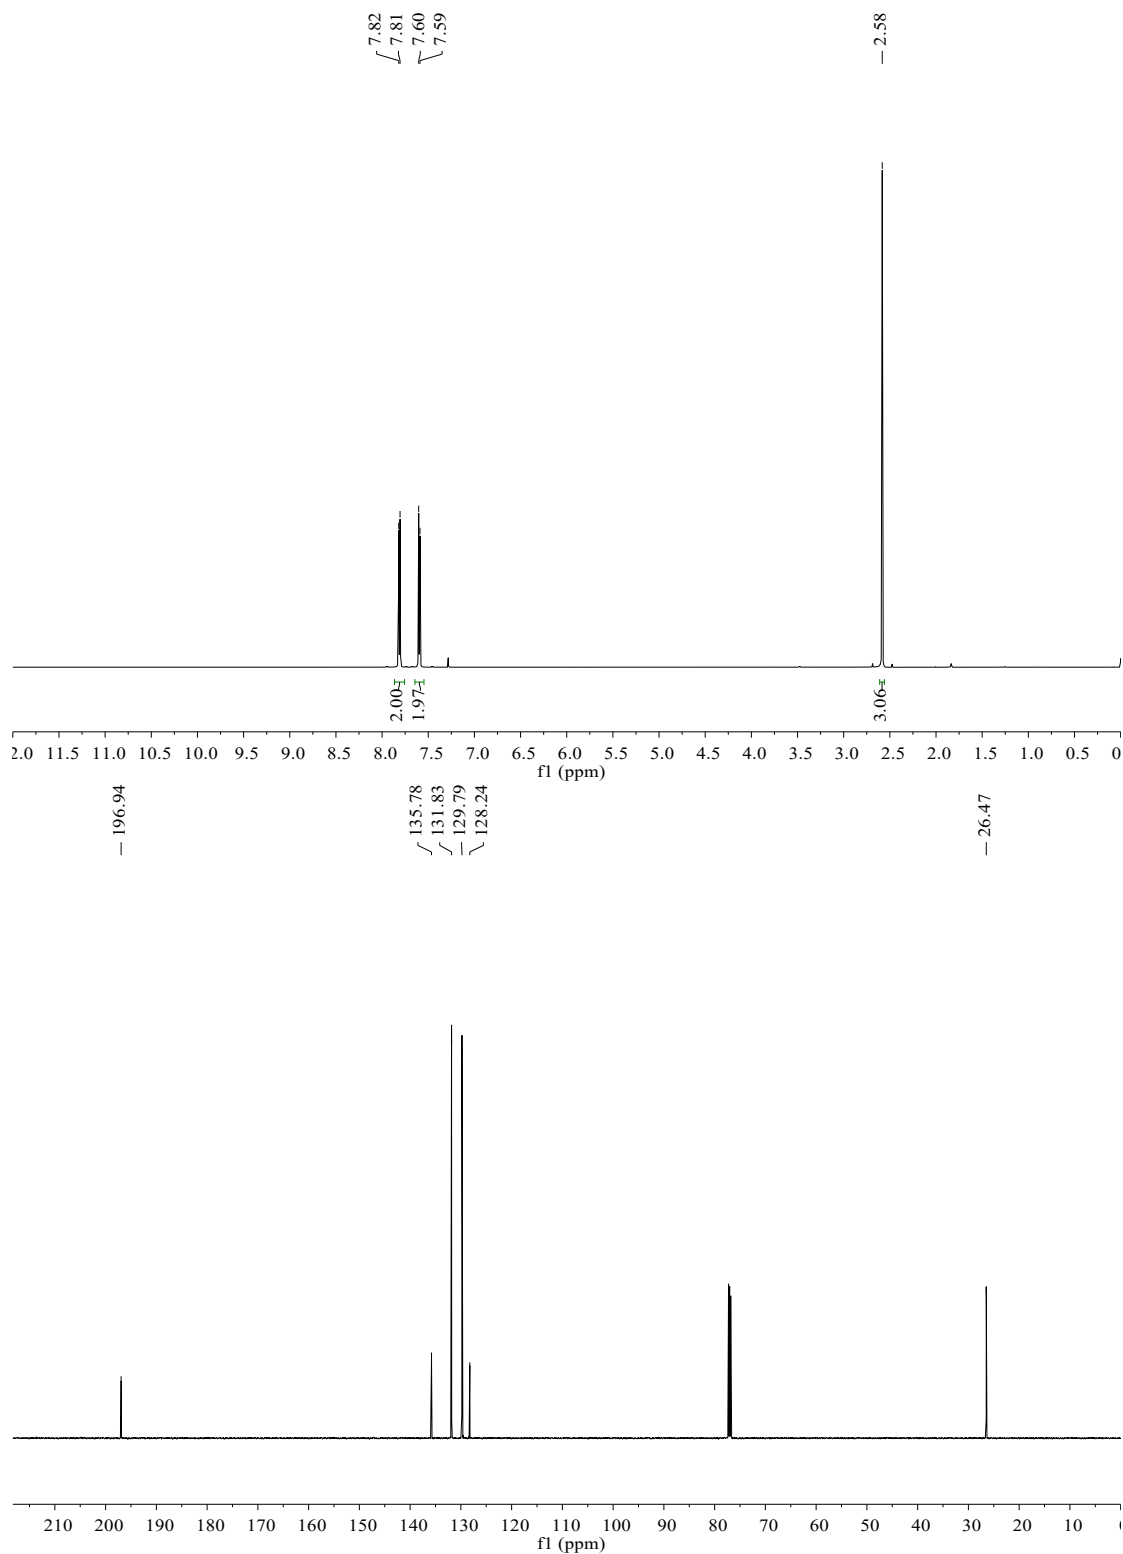

Figure S22  $^1\text{H}$  and  $^{13}\text{C}$  NMR spectrogram of 4-bromophenone

### 4-Iodophenone

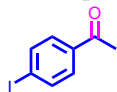

$^1\text{H}$  NMR (600 MHz, Chloroform-*d*)  $\delta$  7.83 (d,  $J = 8.2$  Hz, 2H), 7.67 (d,  $J = 8.3$  Hz, 2H), 2.58 (s, 3H).  $^{13}\text{C}$  NMR (151 MHz, Chloroform-*d*)  $\delta$  197.38, 137.92, 136.34, 129.75, 101.16, 26.53.

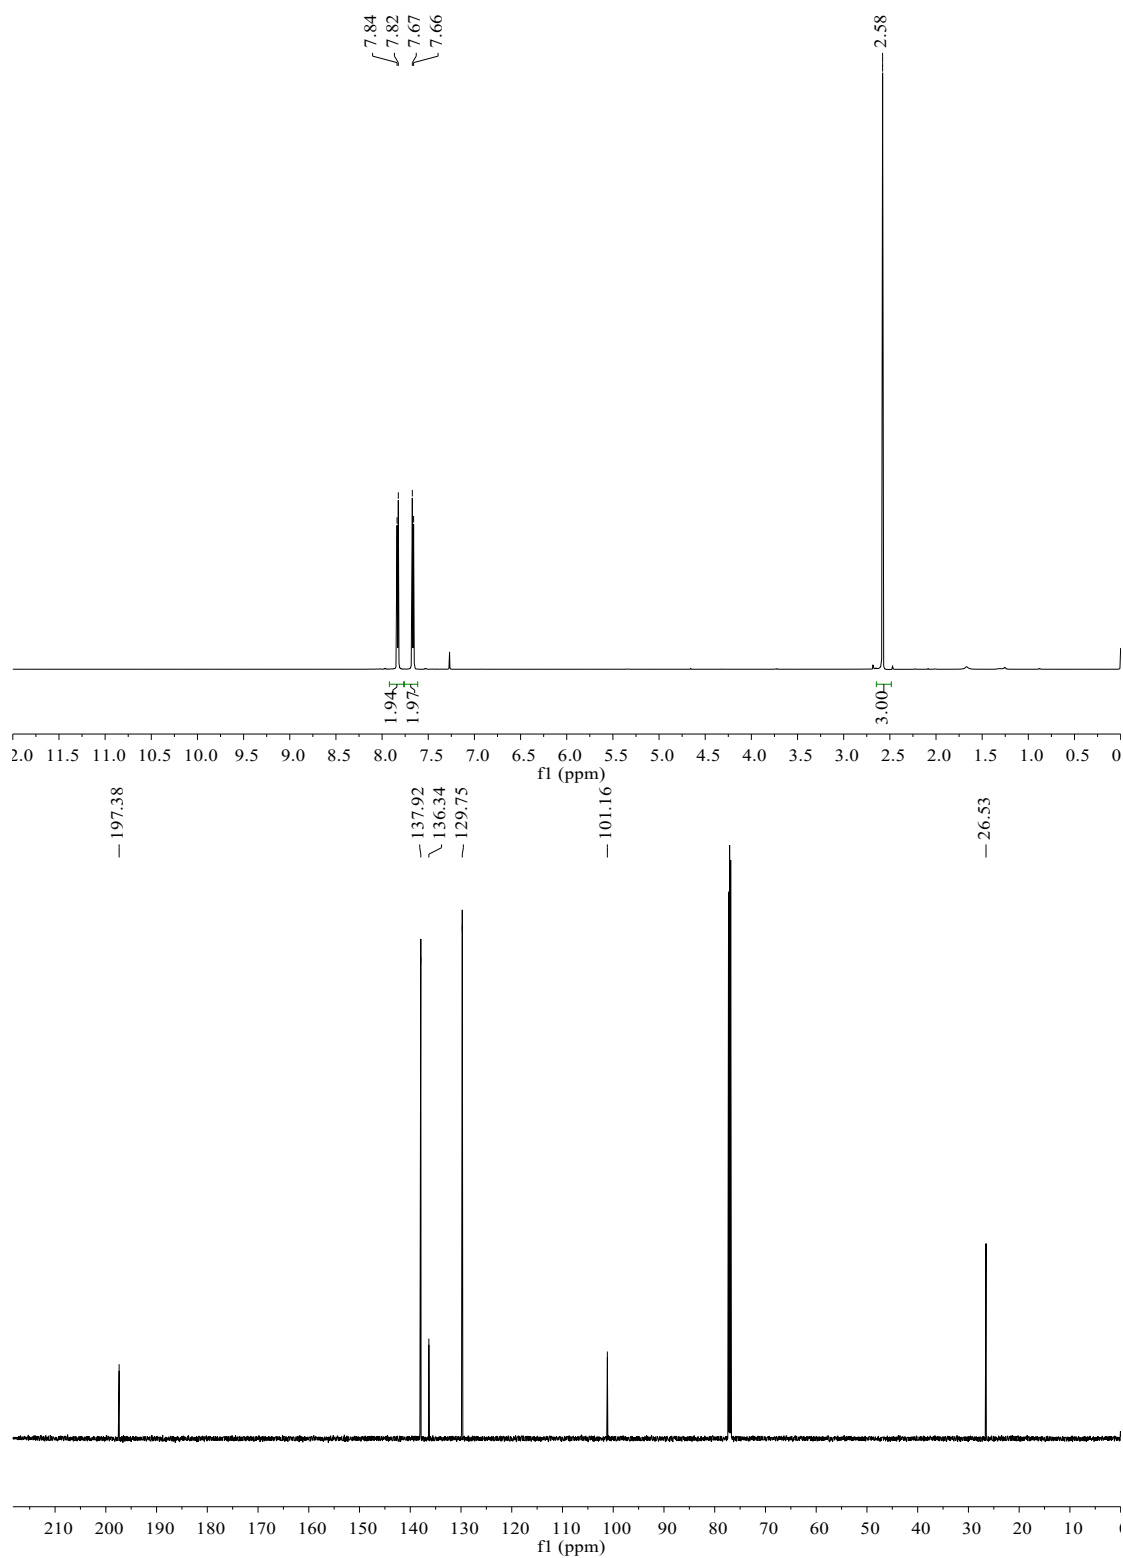

Figure S23  $^1\text{H}$  and  $^{13}\text{C}$  NMR spectrogram of 4-iodophenone

### 4-Aminoacetophenone

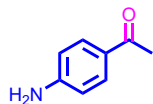

$^1\text{H NMR}$  (600 MHz,  $\text{DMSO-}d_6$ )  $\delta$  7.67 (d,  $J = 8.4$  Hz, 2H), 6.57 (d,  $J = 8.4$  Hz, 2H), 6.04 (s, 2H), 2.39 (s, 3H).  $^{13}\text{C NMR}$  (151 MHz,  $\text{DMSO-}d_6$ )  $\delta$  195.44, 154.12, 131.07, 125.35, 112.96, 26.35.

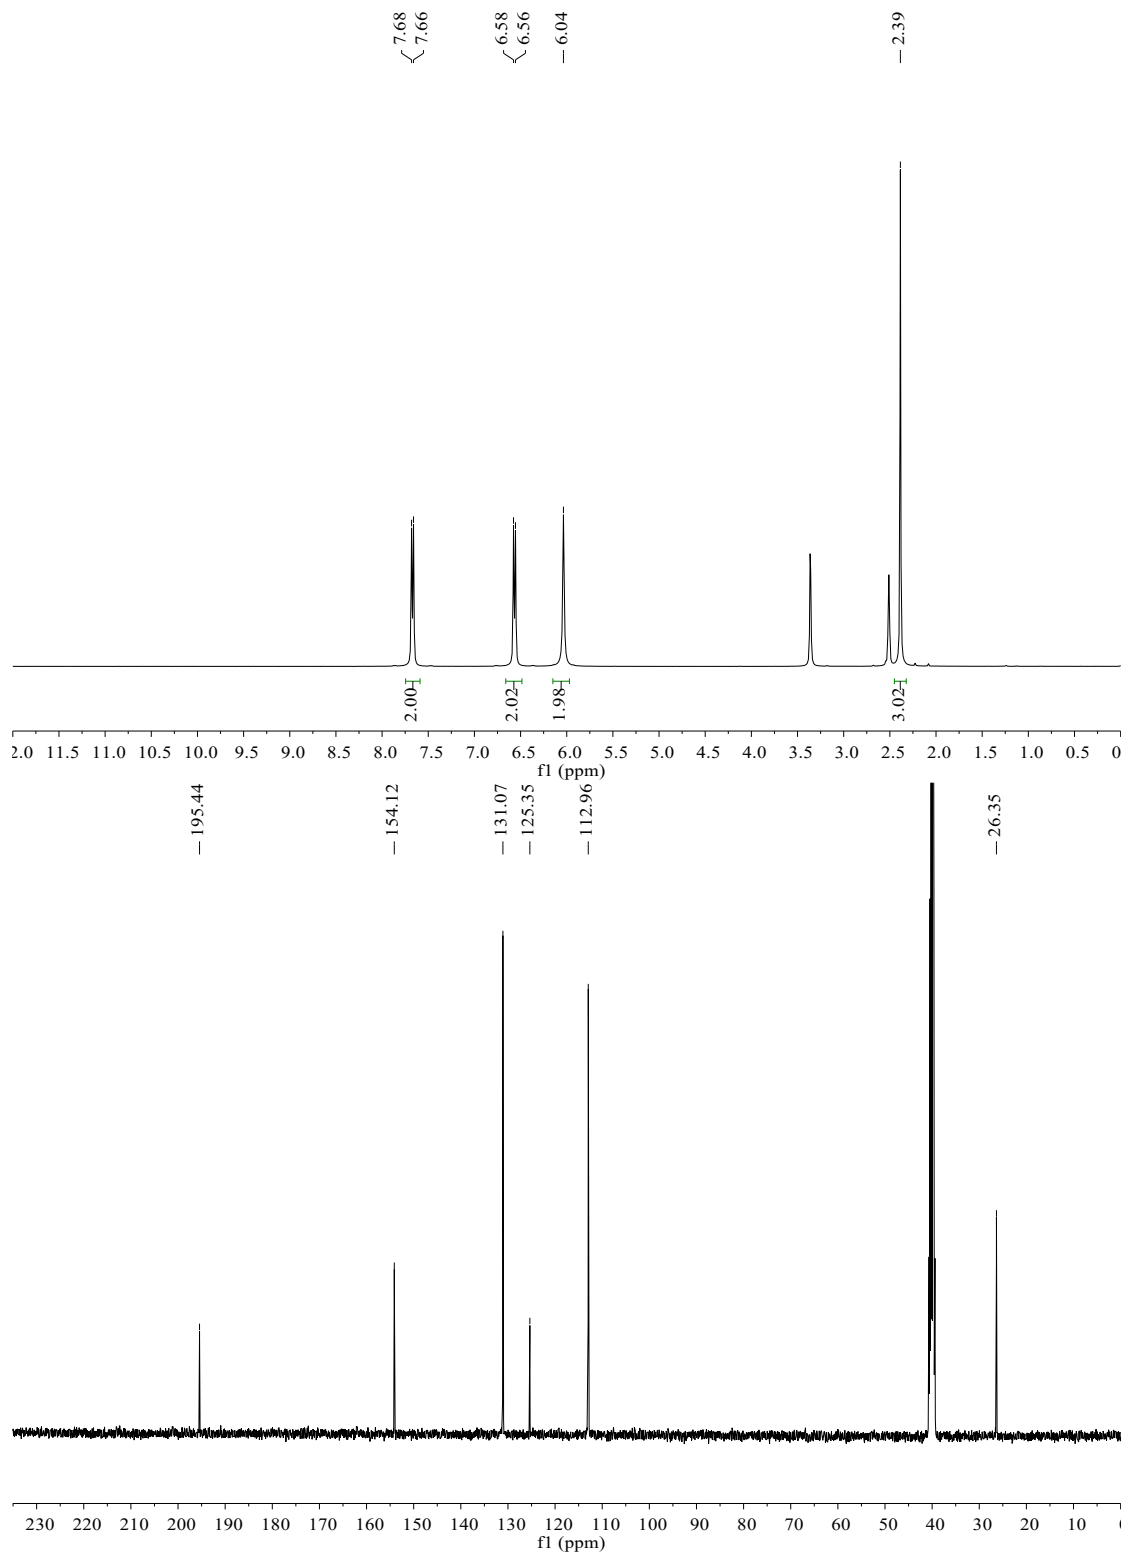

Figure S24  $^1\text{H}$  and  $^{13}\text{C}$  NMR spectrogram of 4-aminoacetophenone

### 4-Nitrophenone

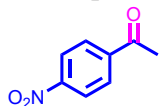

$^1\text{H}$  NMR (600 MHz, Chloroform-*d*)  $\delta$  8.31 (td,  $J = 5.8, 4.7, 2.3$  Hz, 2H), 8.21 – 8.08 (m, 2H), 2.75 – 2.68 (m, 3H).  $^{13}\text{C}$  NMR (151 MHz, Chloroform-*d*)  $\delta$  196.42, 150.28, 141.37, 129.32, 123.81, 26.96.

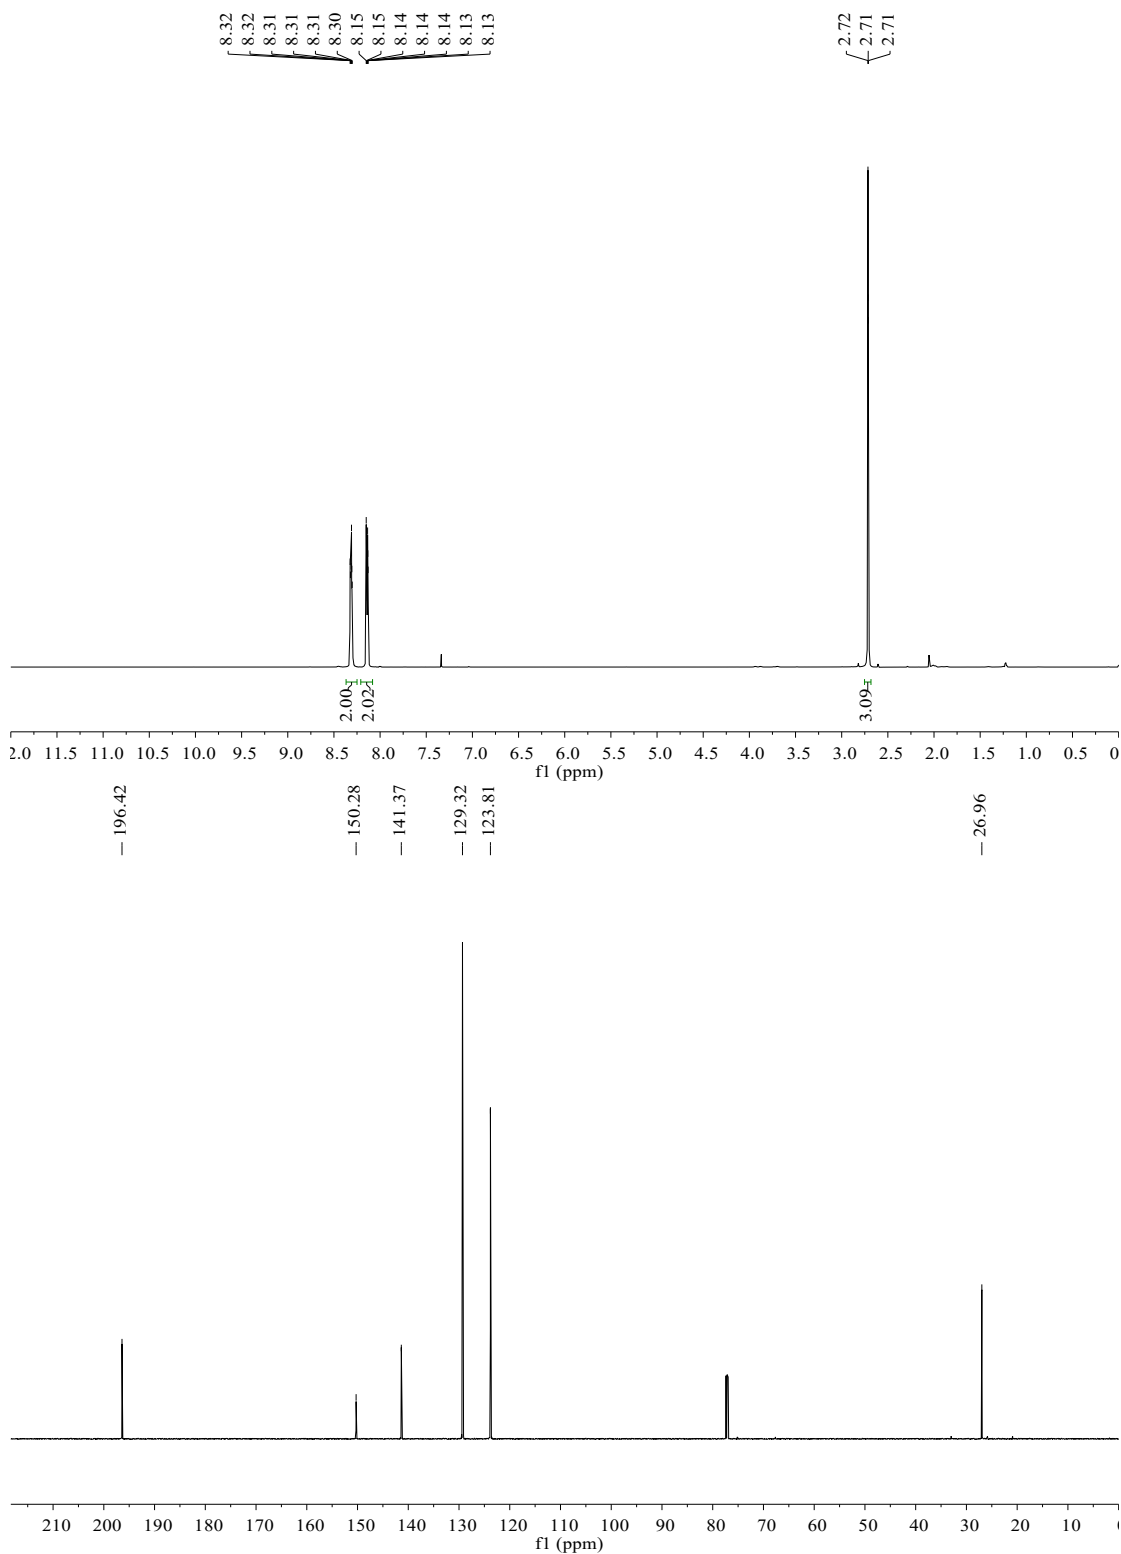

Figure S25  $^1\text{H}$  and  $^{13}\text{C}$  NMR spectrogram of 4-nitrophenone

### Benzophenone

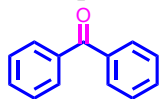

$^1\text{H}$  NMR (600 MHz, Chloroform-*d*)  $\delta$  7.80 (d,  $J = 7.9$  Hz, 4H), 7.58 (t,  $J = 7.4$  Hz, 2H), 7.47 (t,  $J = 7.7$  Hz, 4H).  $^{13}\text{C}$  NMR (151 MHz, Chloroform-*d*)  $\delta$  196.80, 137.61, 132.46, 130.09, 128.31.

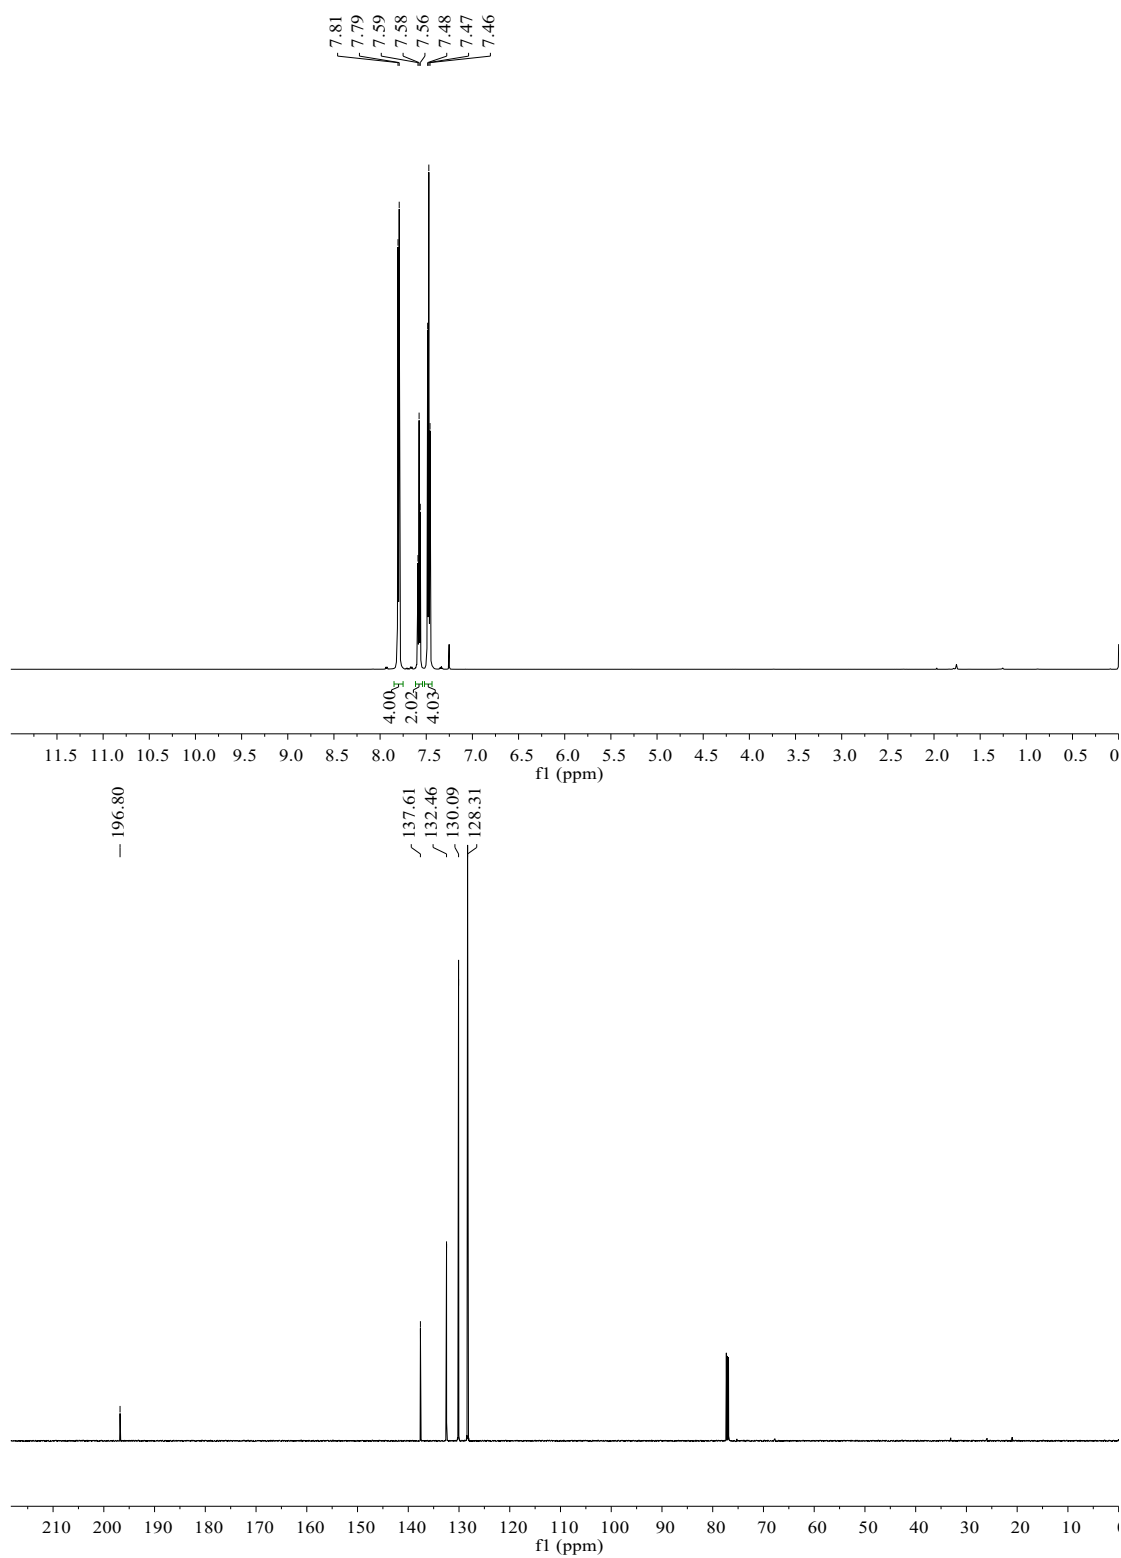

Figure S26  $^1\text{H}$  and  $^{13}\text{C}$  NMR spectrogram of benzophenone



#### 4, 4-Dihydroxy-benzophenon

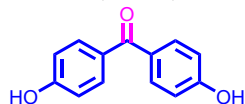

$^1\text{H}$  NMR (600 MHz,  $\text{DMSO-}d_6$ )  $\delta$  10.30 (s, 2H), 7.62 (d,  $J = 8.7$  Hz, 4H), 6.90 (d,  $J = 8.7$  Hz, 4H).  $^{13}\text{C}$  NMR (151 MHz,  $\text{DMSO-}d_6$ )  $\delta$  193.56, 161.74, 132.54, 129.30, 115.52.

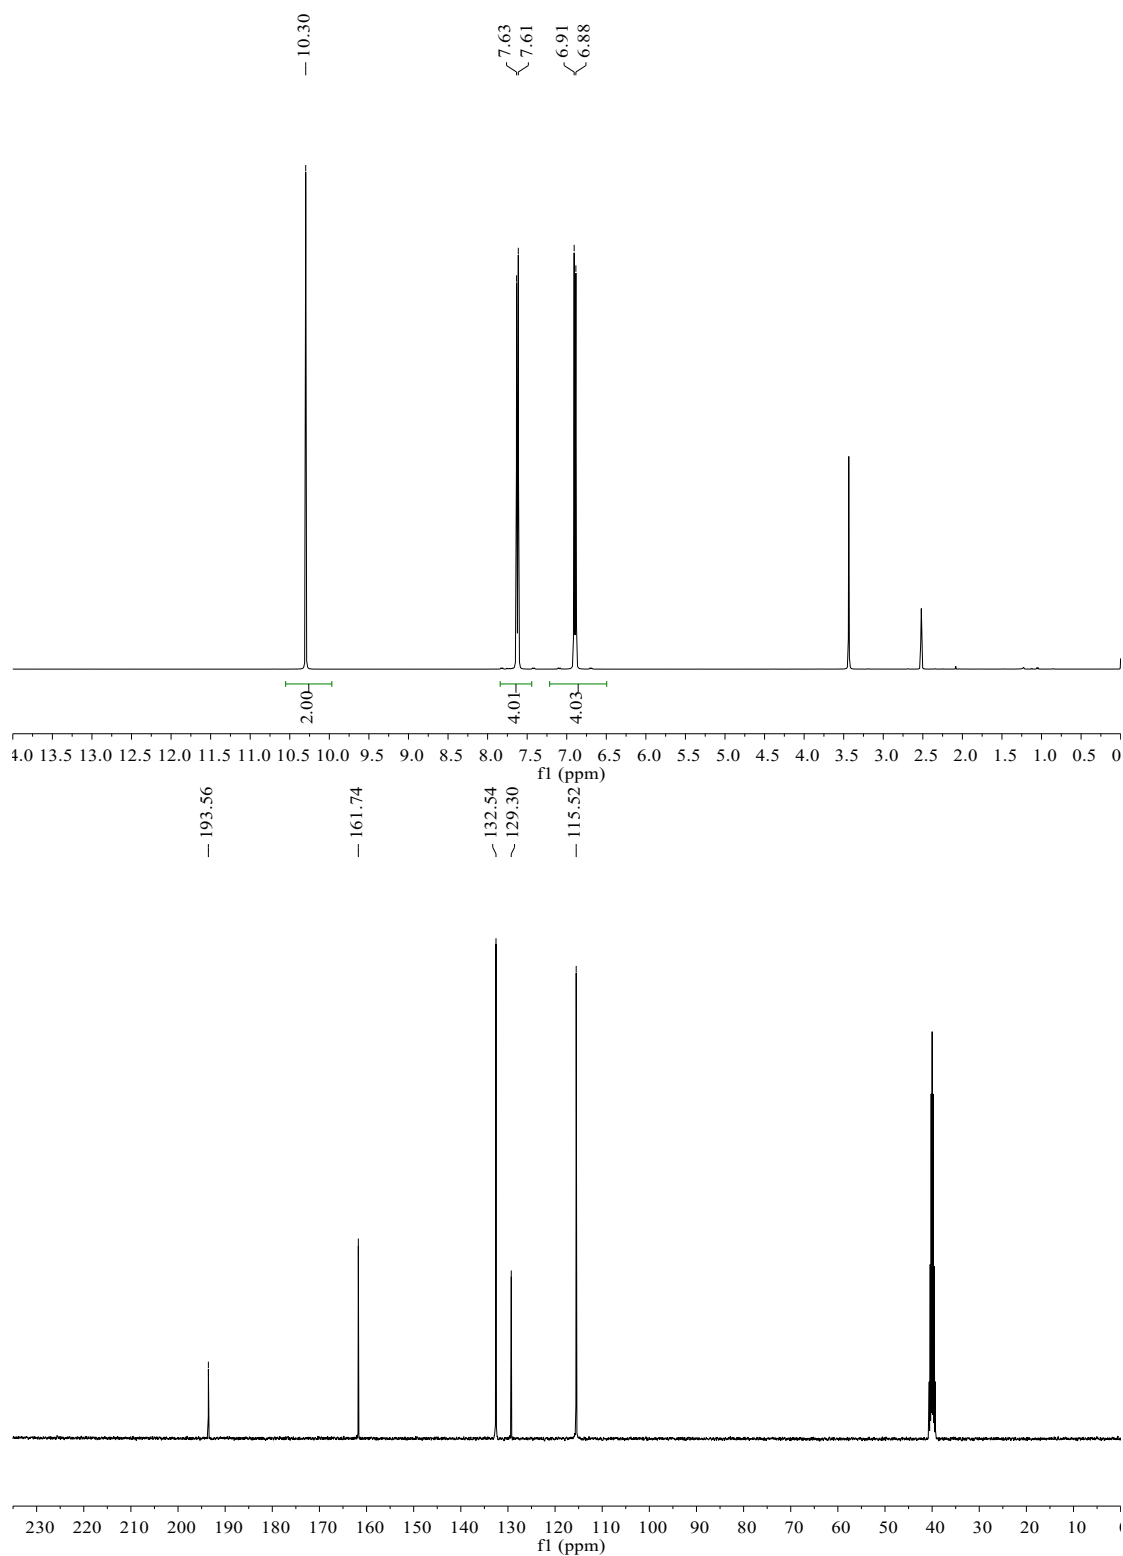

Figure S27  $^1\text{H}$  and  $^{13}\text{C}$  NMR spectrogram of 4, 4-dihydroxy-benzophenon

#### 4, 4-Diaminobenzophenone

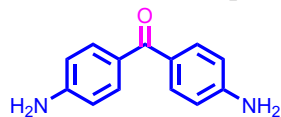

$^1\text{H}$  NMR (600 MHz,  $\text{DMSO-}d_6$ )  $\delta$  7.47 (d,  $J = 8.4$  Hz, 4H), 6.61 (d,  $J = 8.4$  Hz, 4H), 5.93 (s, 4H).  $^{13}\text{C}$  NMR (151 MHz,  $\text{DMSO-}d_6$ )  $\delta$  150.44, 129.78, 123.45, 110.37.

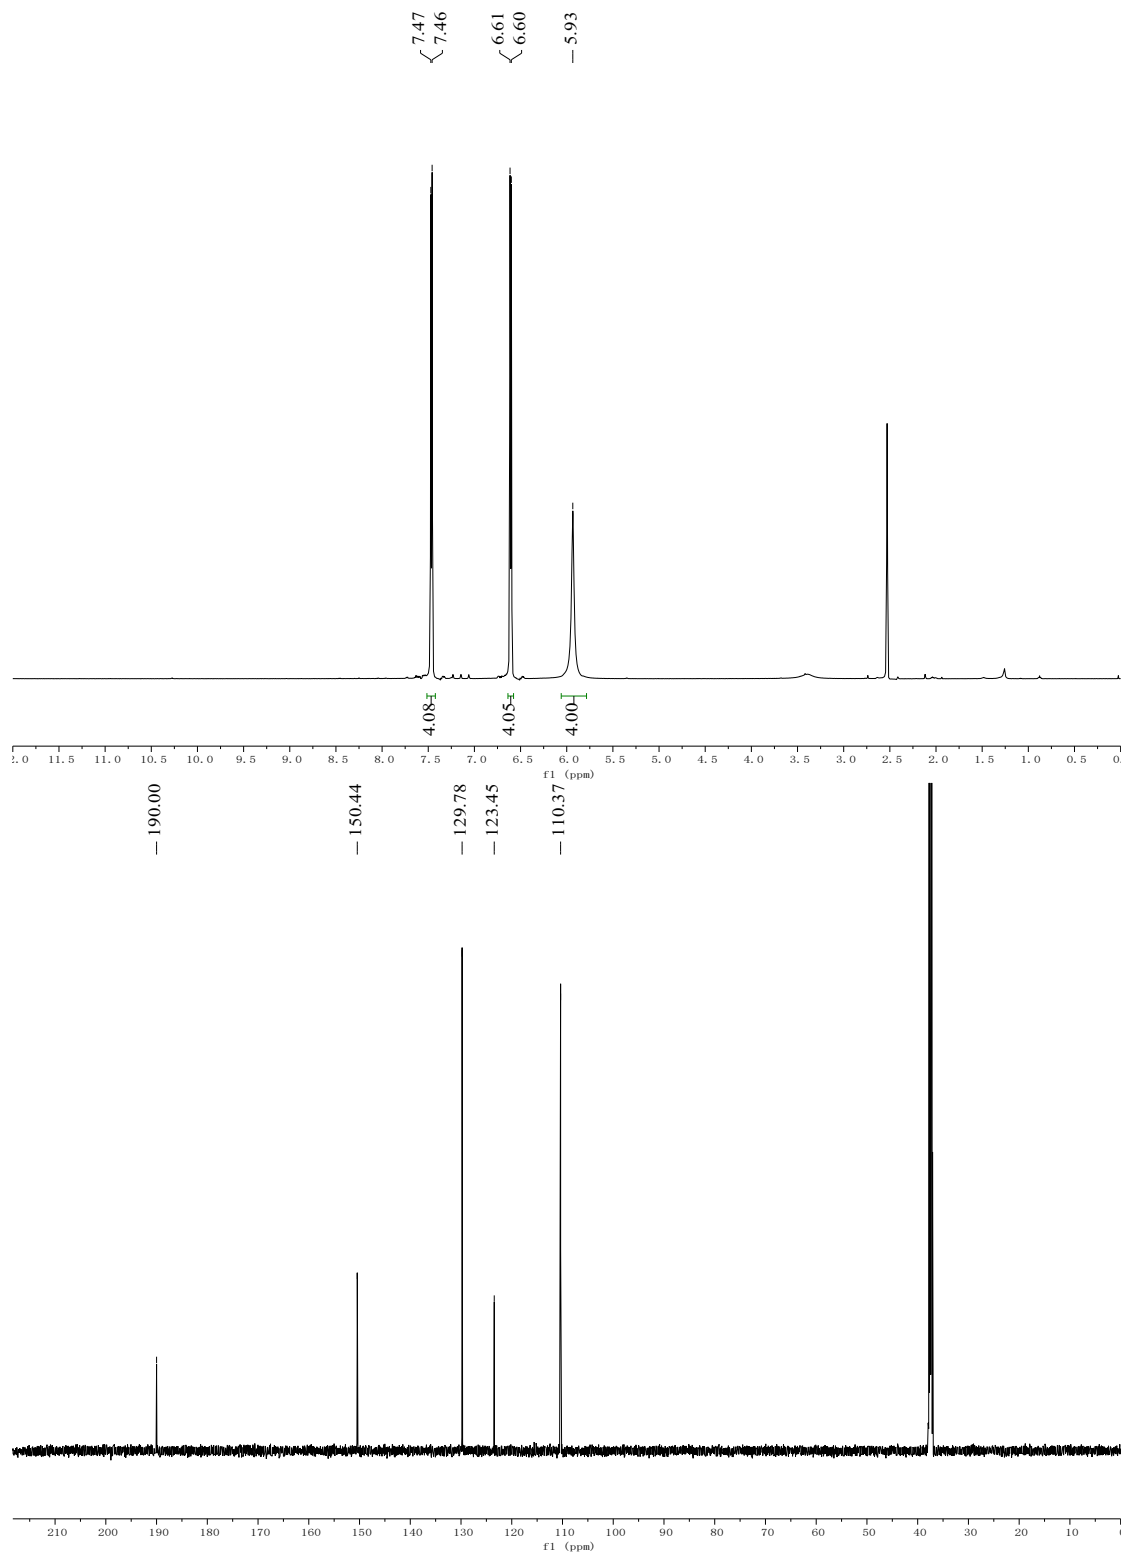

Figure S28  $^1\text{H}$  and  $^{13}\text{C}$  NMR spectrogram of 4, 4-diaminobenzophenon

### Xanthone

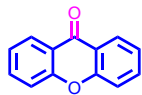

$^1\text{H}$  NMR (600 MHz, Chloroform-*d*)  $\delta$  8.33 (d,  $J = 7.9$  Hz, 2H), 7.71 (t,  $J = 7.8$  Hz, 2H), 7.48 (d,  $J = 8.4$  Hz, 2H), 7.37 (t,  $J = 7.5$  Hz, 2H).  $^{13}\text{C}$  NMR (151 MHz, Chloroform-*d*)  $\delta$  137.30, 132.27, 129.89, 129.27, 126.31, 125.99.

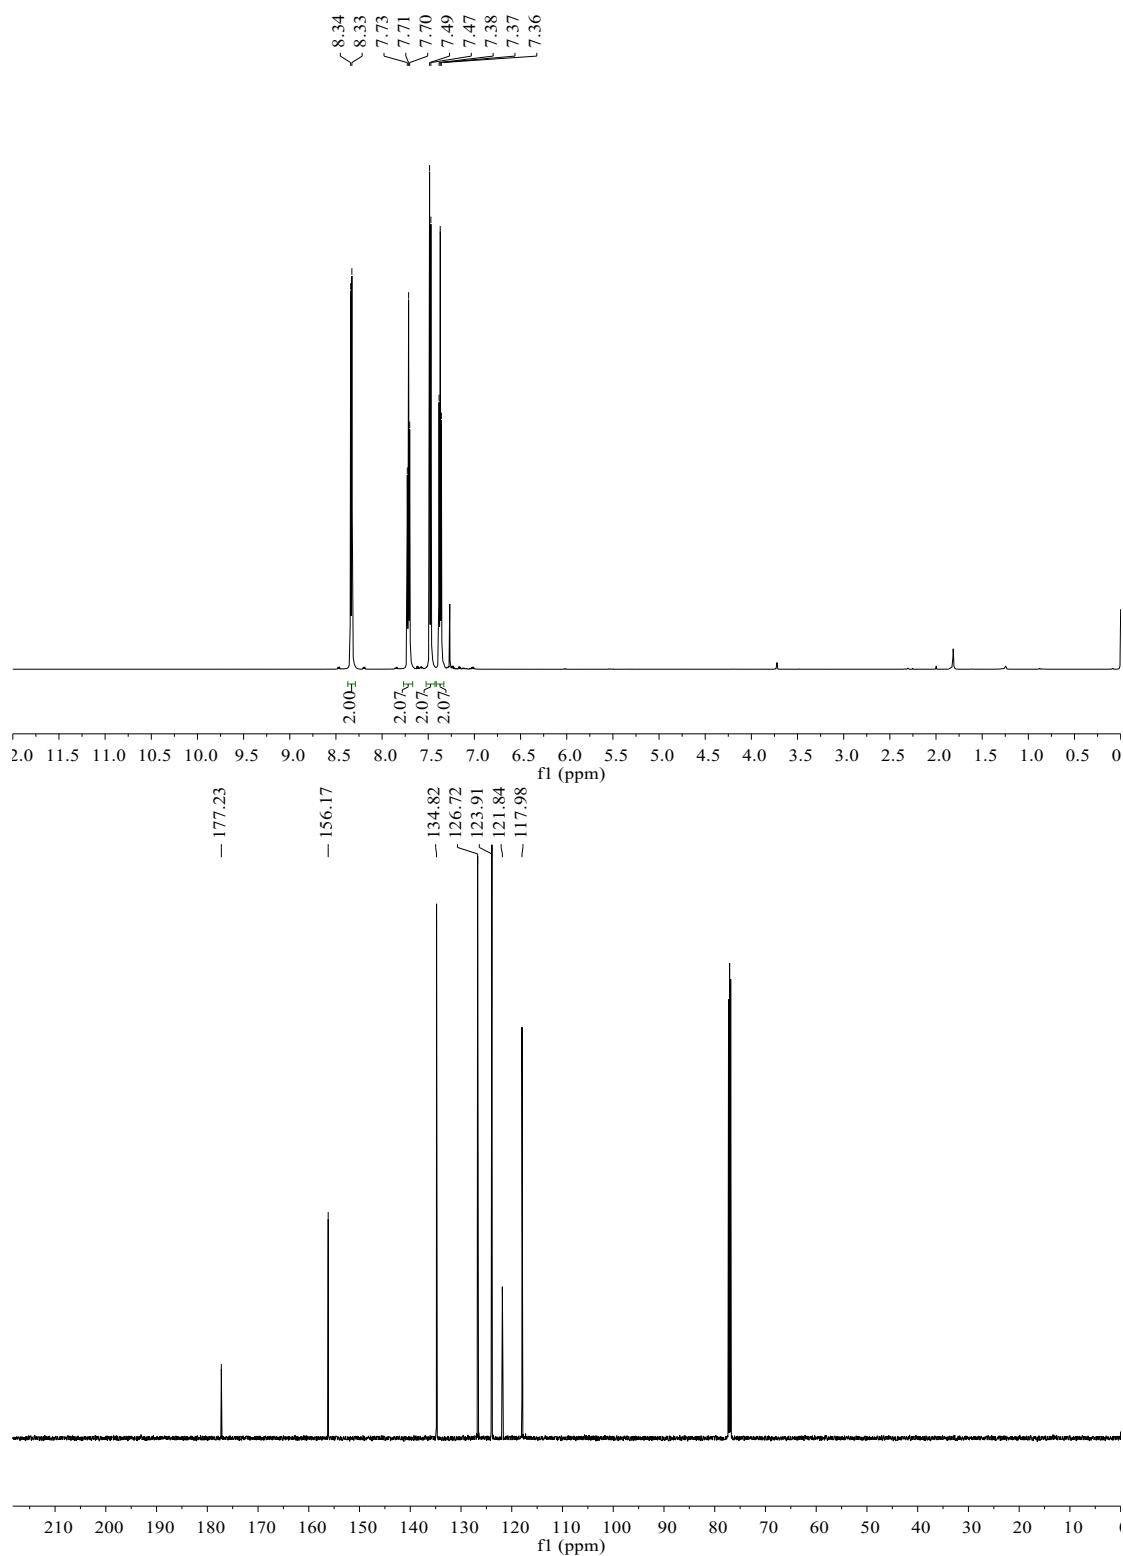

Figure S29  $^1\text{H}$  and  $^{13}\text{C}$  NMR spectrogram of xanthone

**Thioxanthen-9-one**

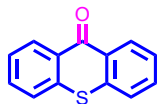

$^1\text{H}$  NMR (600 MHz, Chloroform-*d*)  $\delta$  8.63 (s, 2H), 7.55 (d,  $J = 80.1$  Hz, 6H).  $^{13}\text{C}$  NMR (151 MHz, Chloroform-*d*)  $\delta$  179.98, 137.30, 132.27, 129.89, 126.31, 125.99.

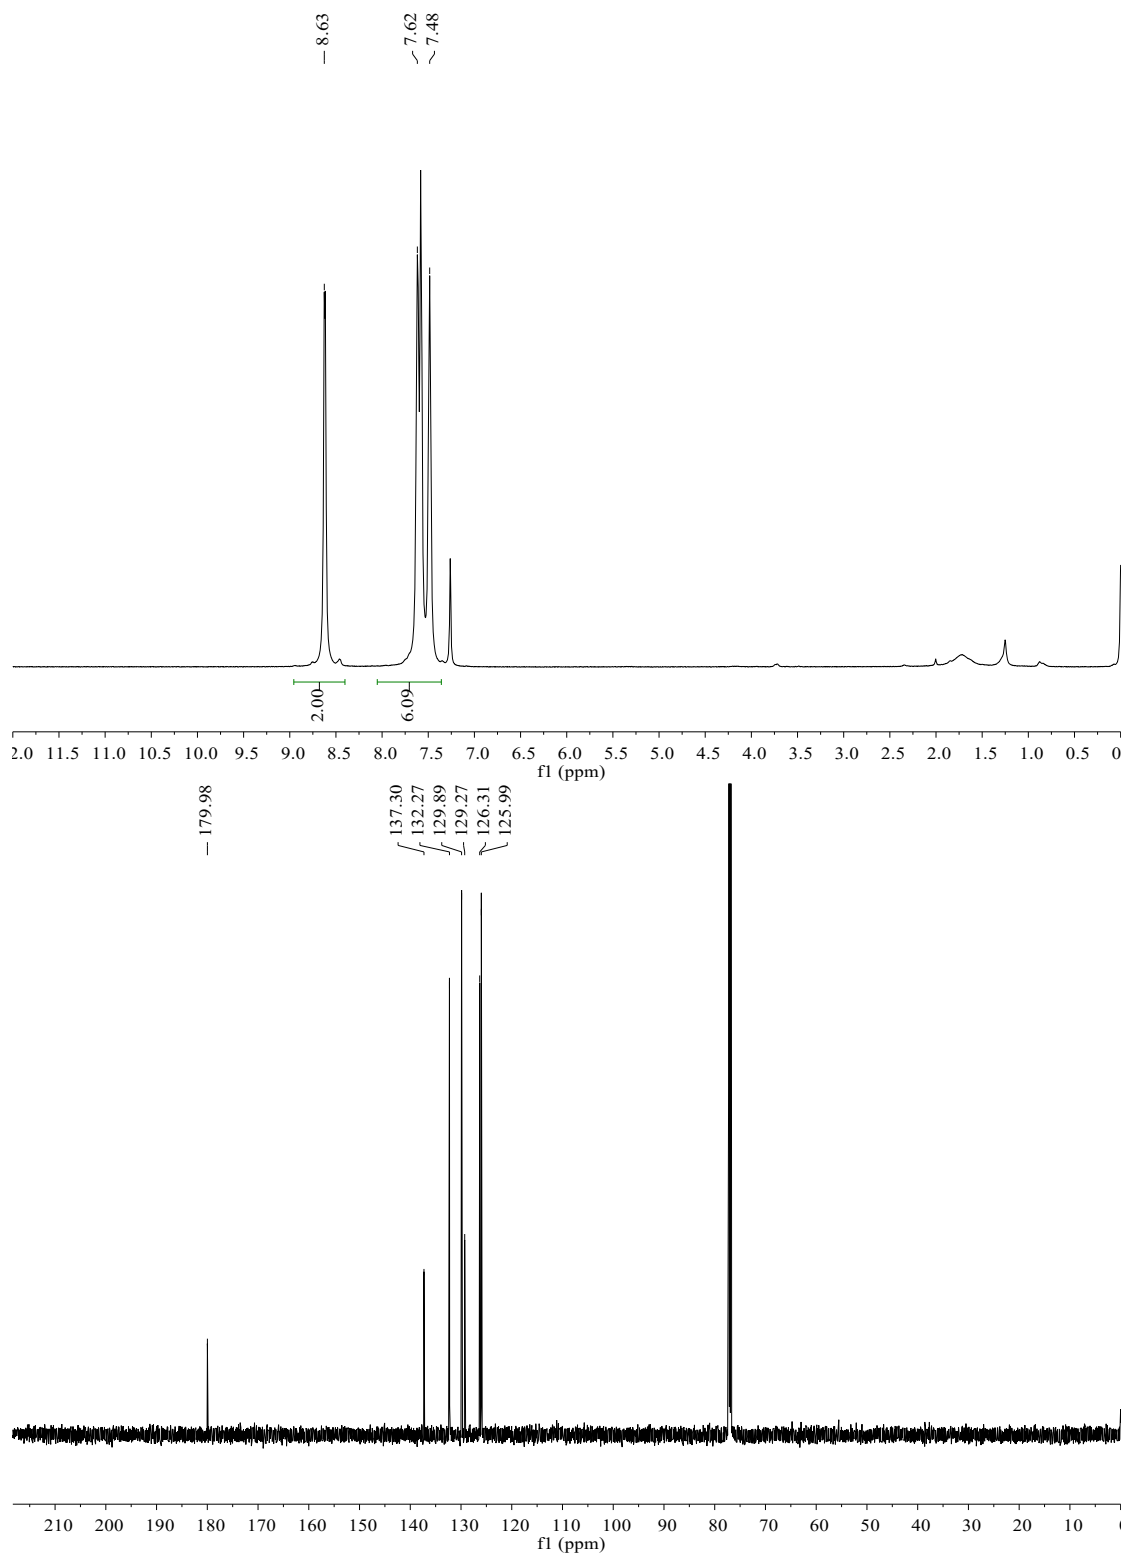

**Figure S30  $^1\text{H}$  and  $^{13}\text{C}$  NMR spectrogram of thioxanthen-9-one**

### Benzaldehyde

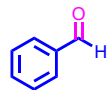

$^1\text{H}$  NMR (600 MHz, Chloroform-*d*)  $\delta$  10.02 (s, 1H), 7.88 (d,  $J = 7.9$  Hz, 2H), 7.62 (q,  $J = 7.6$  Hz, 1H), 7.53 (t,  $J = 7.6$  Hz, 2H).  $^{13}\text{C}$  NMR (151 MHz, Chloroform-*d*)  $\delta$  179.98, 137.30, 129.89, 129.27, 126.31, 125.99.

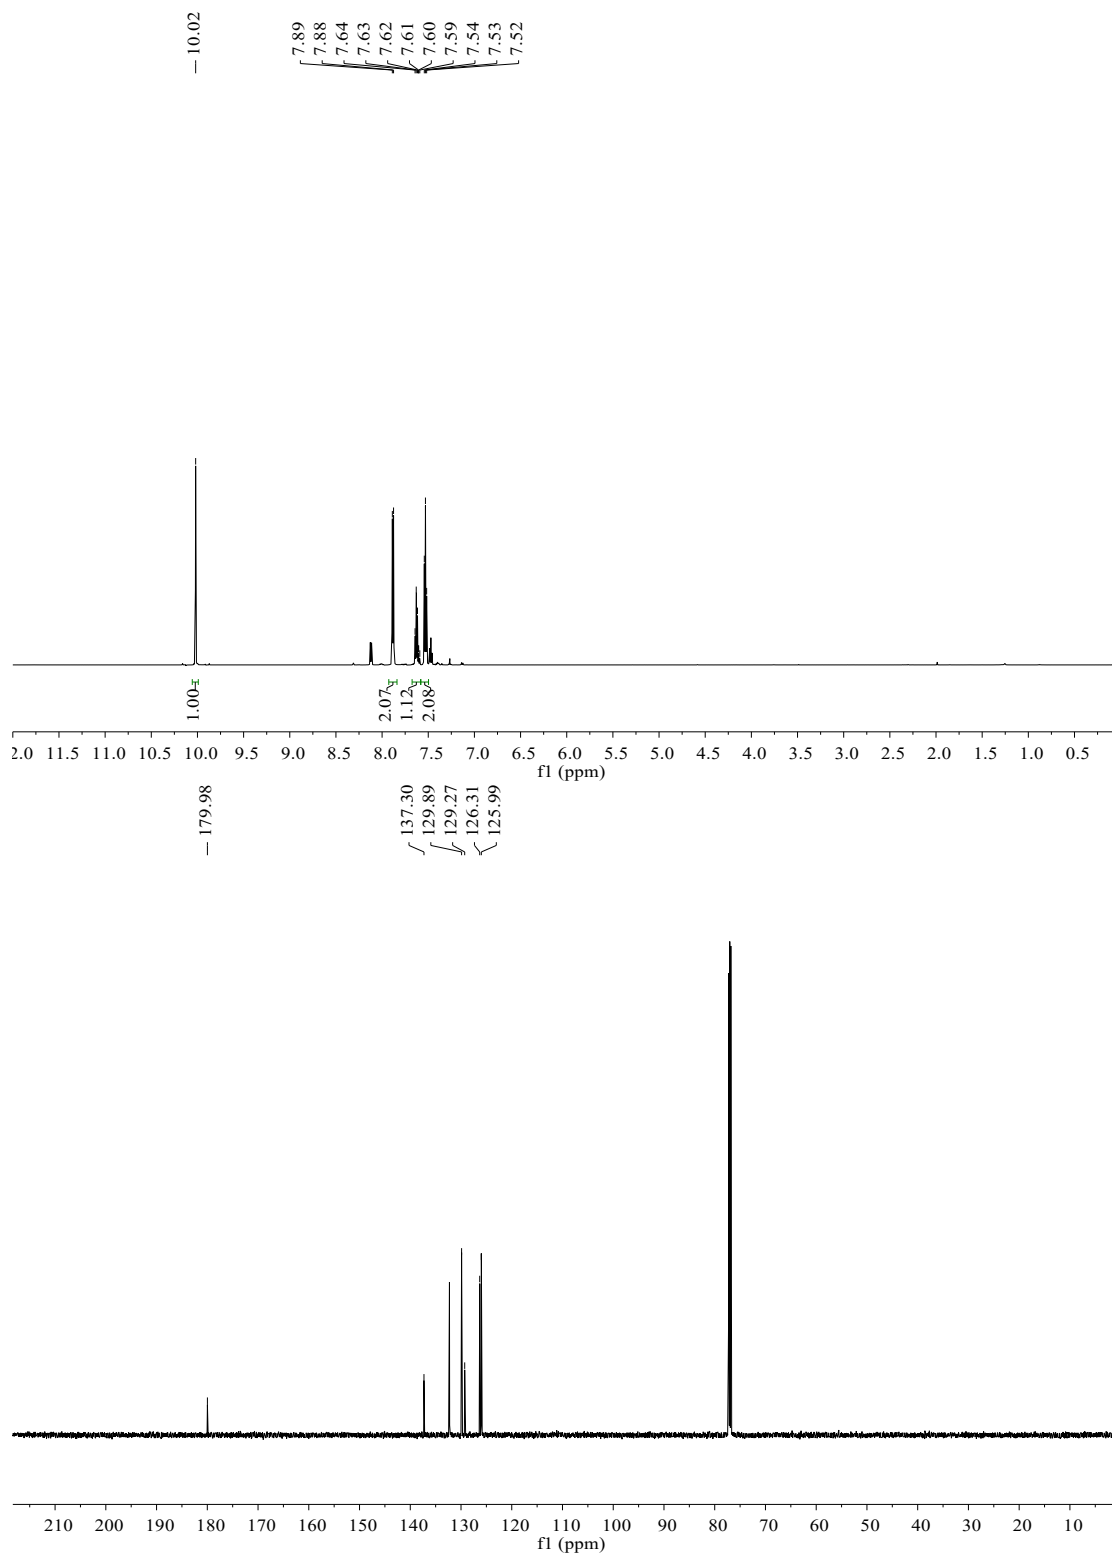

Figure S31  $^1\text{H}$  and  $^{13}\text{C}$  NMR spectrogram of benzaldehyde

### Cyclohexanone

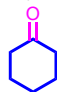

$^1\text{H}$  NMR (600 MHz, Chloroform-*d*)  $\delta$  9.70 (d,  $J = 7.7$  Hz, 1H), 7.56 (dd,  $J = 7.3, 2.2$  Hz, 2H), 7.52 – 7.33 (m, 4H), 6.72 (dd,  $J = 15.9, 7.7$  Hz, 1H).  $^{13}\text{C}$  NMR (151 MHz, Chloroform-*d*)  $\delta$  211.98, 41.88, 26.93, 24.90.

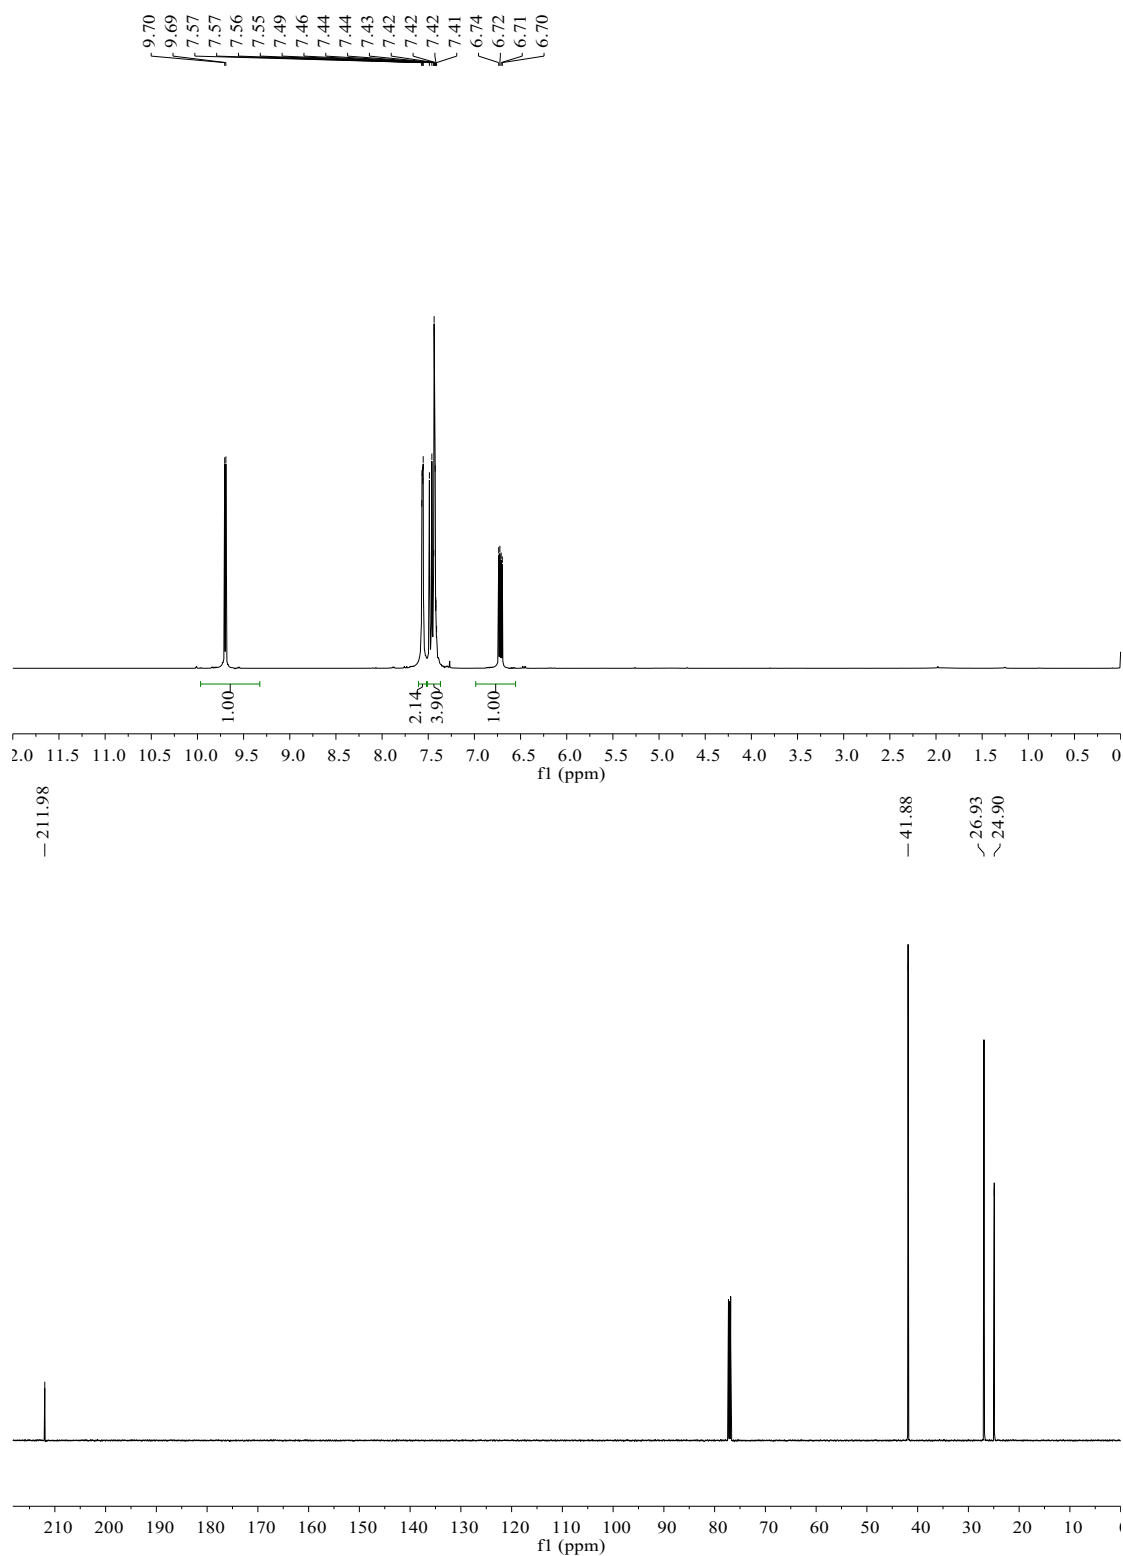

Figure S32  $^1\text{H}$  and  $^{13}\text{C}$  NMR spectrogram of cyclohexanone

**Phenol**

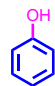

$^1\text{H NMR}$  (400 MHz,  $\text{DMSO-}d_6$ )  $\delta$  9.35 (s, 1H), 7.20 – 7.16 (m, 2H), 6.80-6.76 (d,  $J = 8.4$  Hz, 3H).

$^{13}\text{C NMR}$  (101 MHz,  $\text{DMSO-}d_6$ )  $\delta$  157.82, 129.87, 119.30, 115.72.

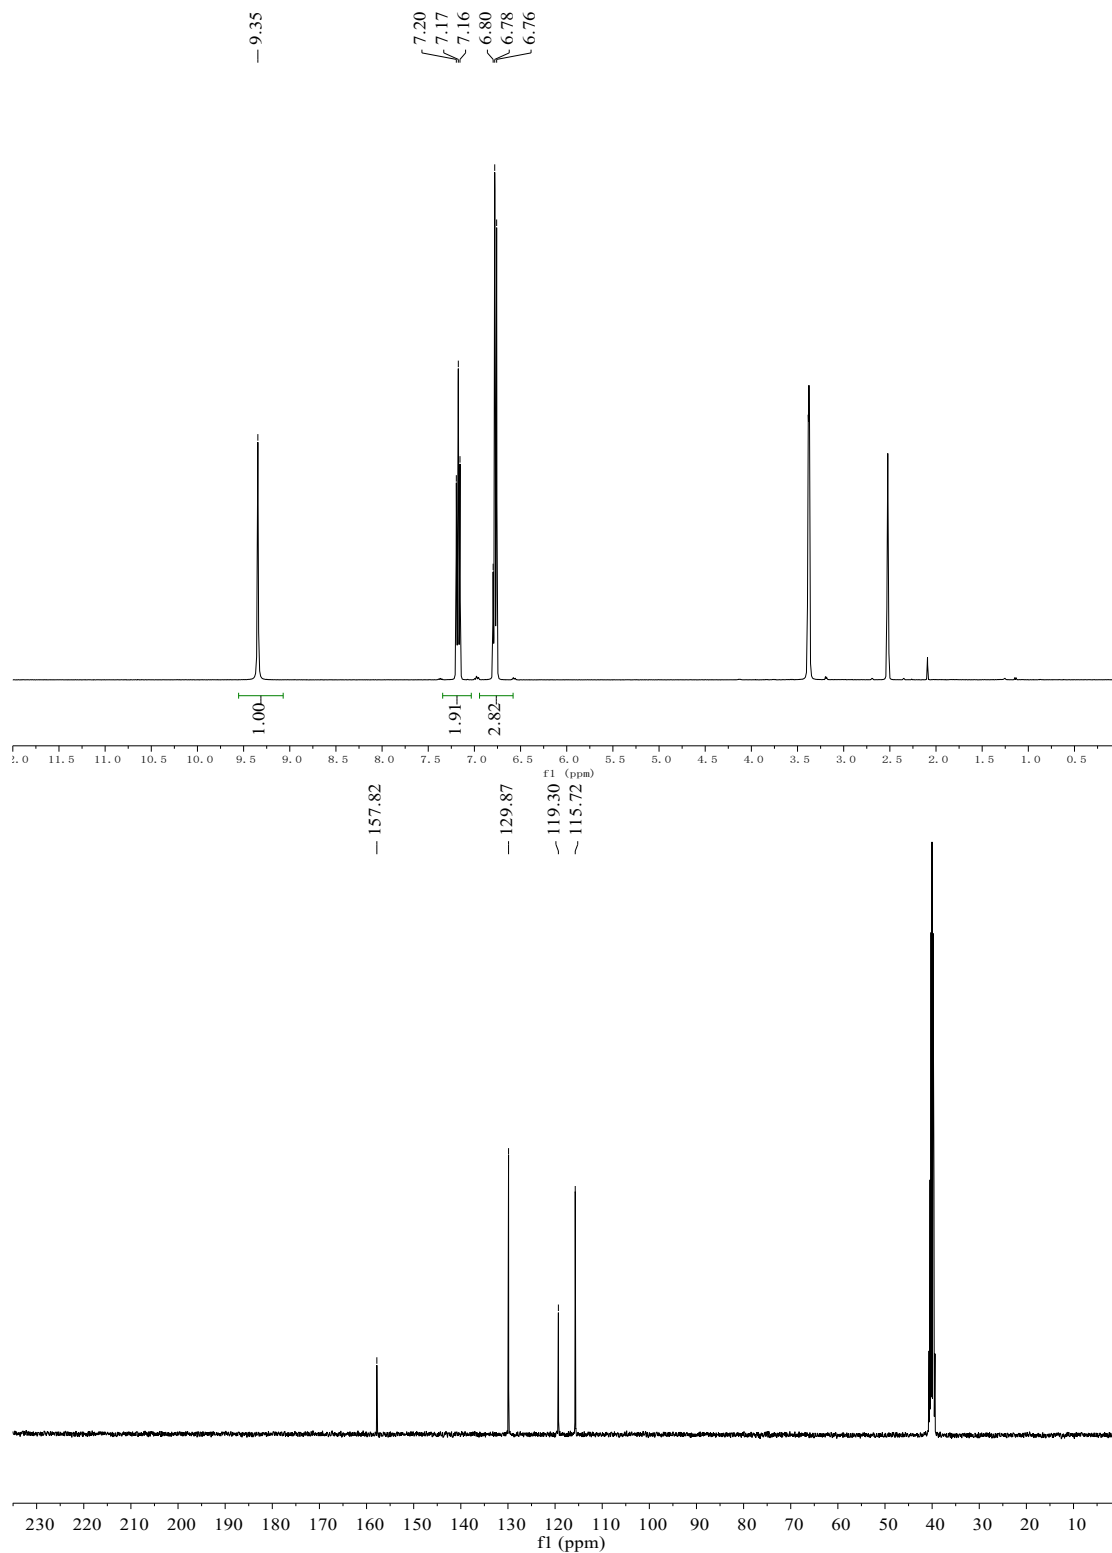

**Figure S33  $^1\text{H}$  and  $^{13}\text{C}$  NMR spectrogram of phenol**

### Benzaldehyde

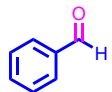

$^1\text{H}$  NMR (600 MHz, Chloroform-*d*)  $\delta$  10.03 (s, 1H), 7.89 (d,  $J = 8.1$  Hz, 2H), 7.64 (t,  $J = 7.4$  Hz, 1H), 7.54 (t,  $J = 7.6$  Hz, 2H).  $^{13}\text{C}$  NMR (151 MHz, Chloroform-*d*)  $\delta$  192.46, 136.41, 134.50, 129.77, 129.02.

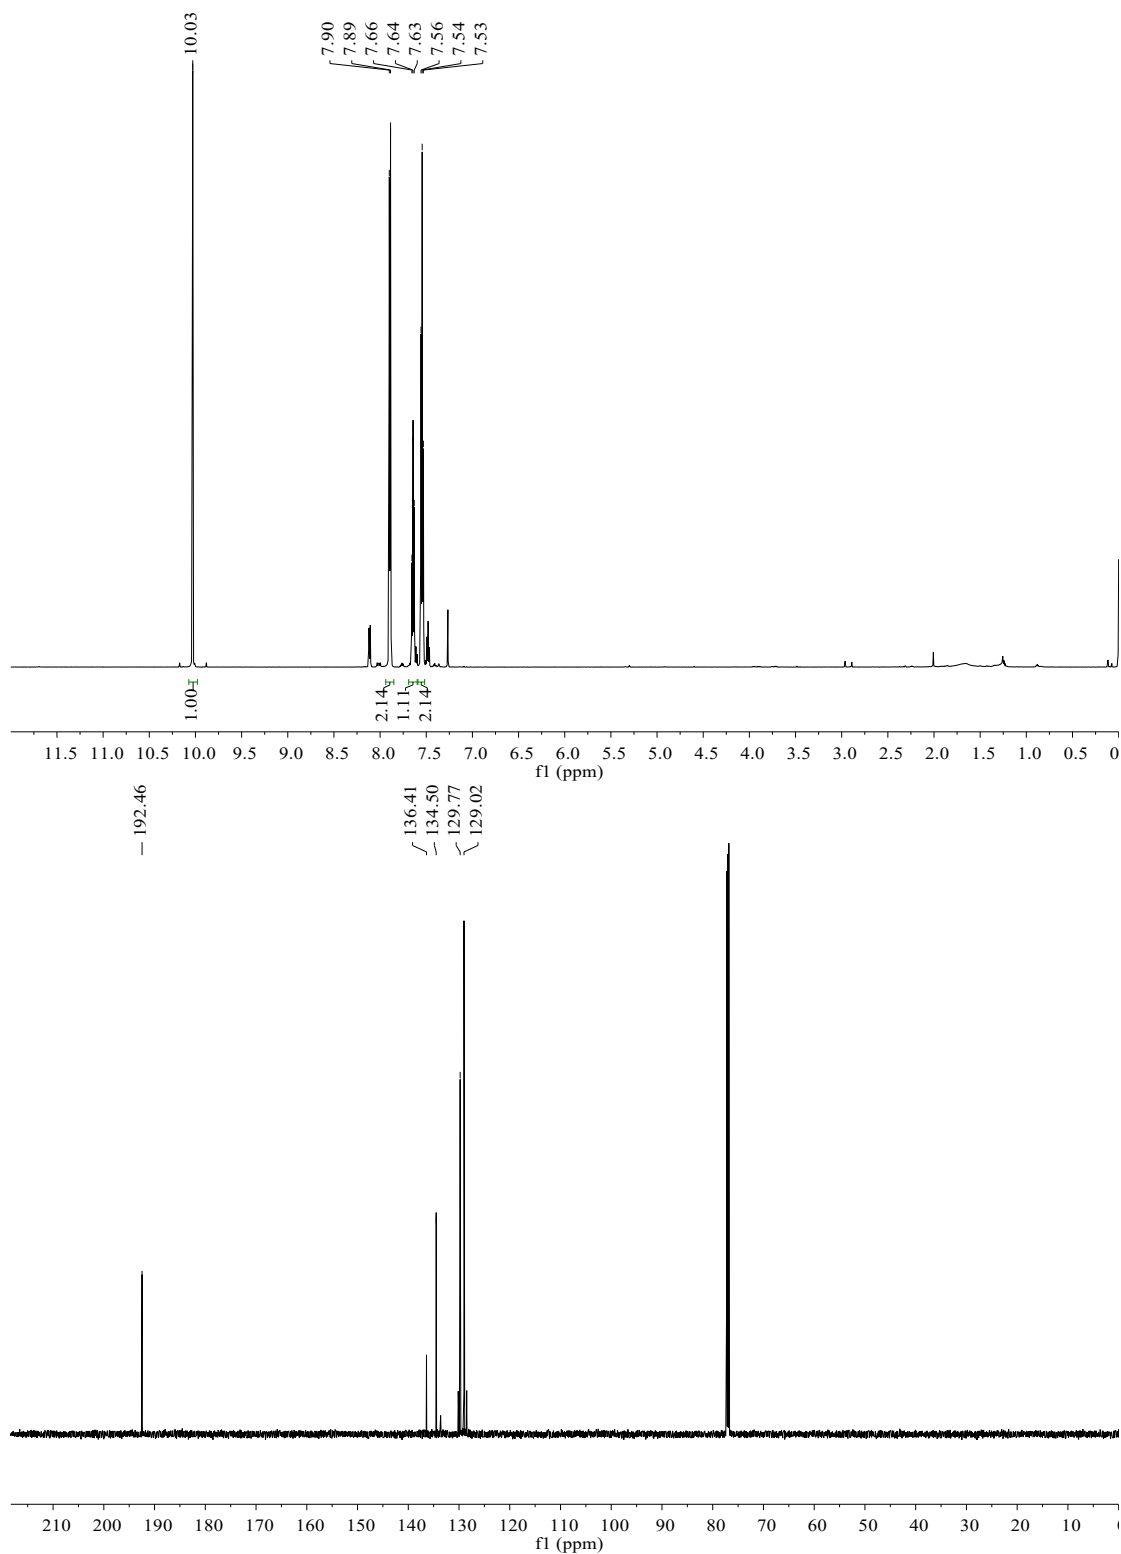

Figure S34  $^1\text{H}$  and  $^{13}\text{C}$  NMR spectrogram of benzaldehyde



### Phenylacetaldehyde

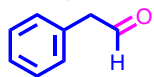

**<sup>1</sup>H NMR (600 MHz, Chloroform-*d*)** δ 9.64 (s, 1H), 7.28 (t, *J* = 7.5 Hz, 2H), 7.22 (d, *J* = 7.3 Hz, 2H), 7.12 (d, *J* = 7.7 Hz, 2H), 3.58 (s, 2H). **<sup>13</sup>C NMR (151 MHz, Chloroform-*d*)** δ 199.50, 131.90, 129.66, 129.04, 127.45, 50.60.

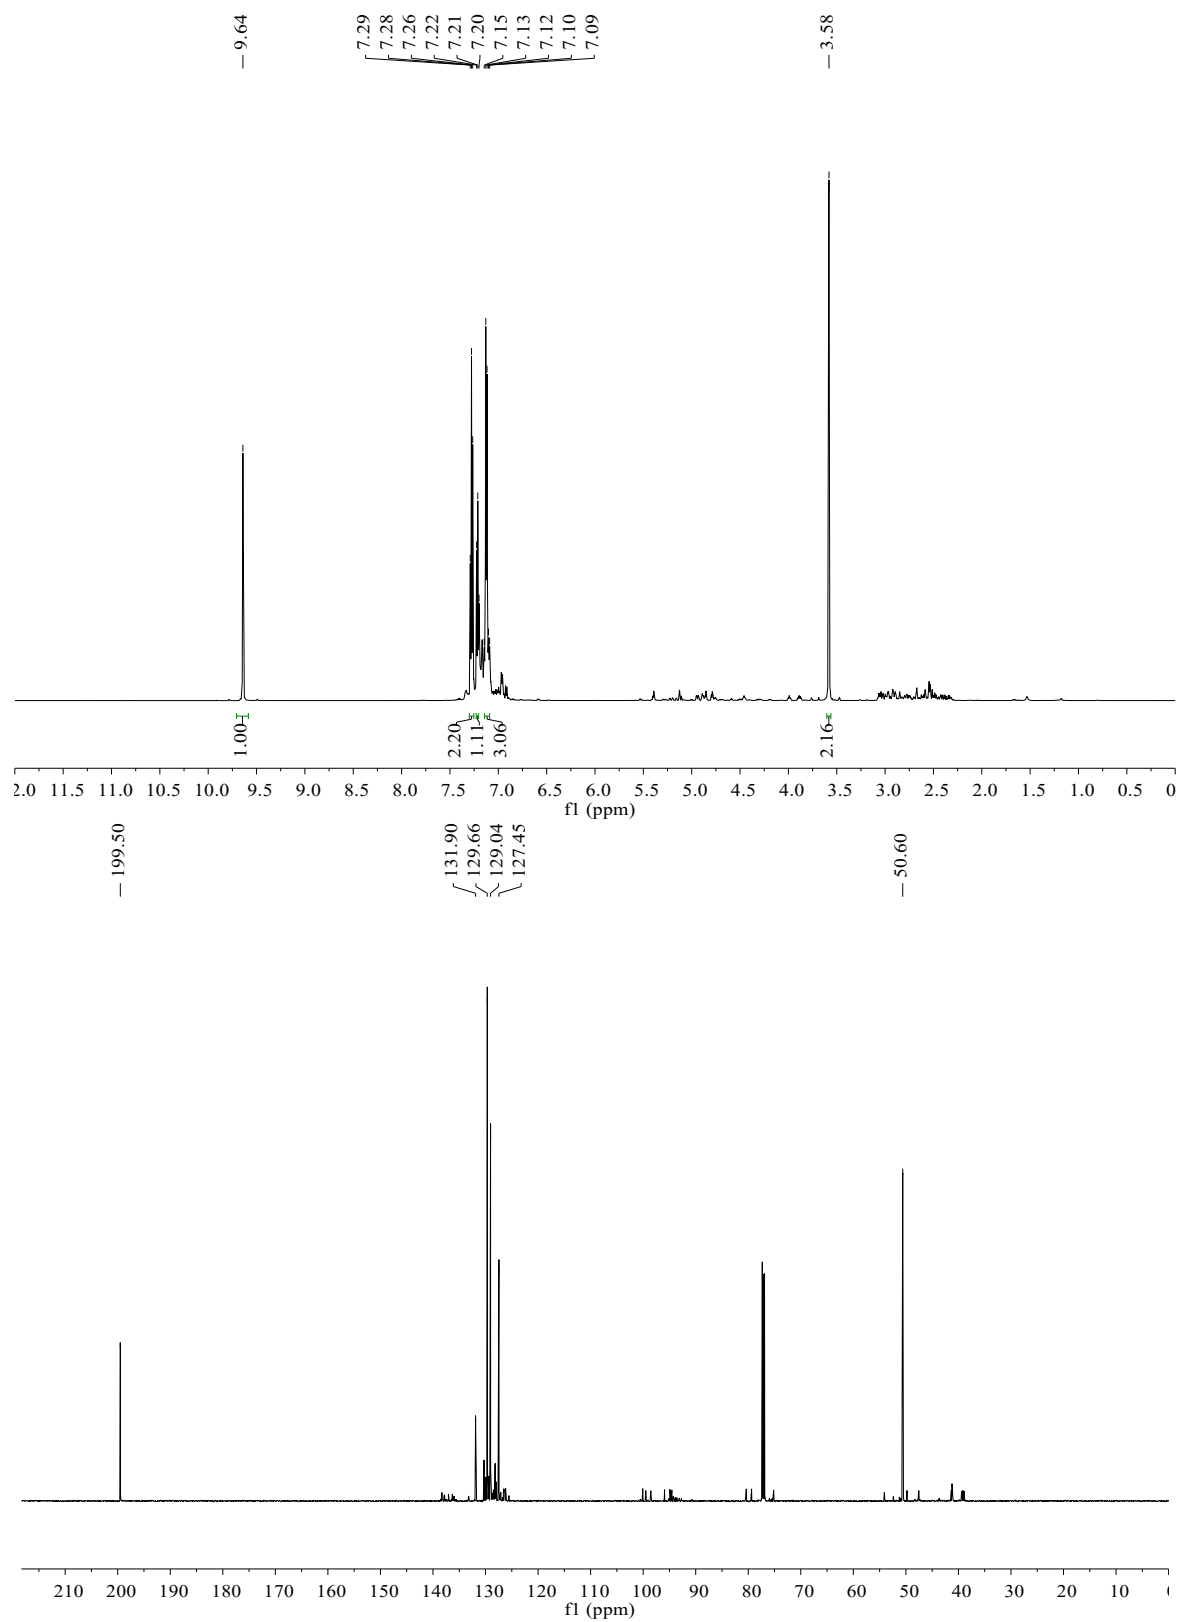

Figure S35 <sup>1</sup>H and <sup>13</sup>C NMR spectrogram of phenylacetaldehyde

### 4-pyridinaldehyde

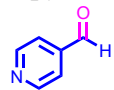

$^1\text{H}$  NMR (600 MHz, Chloroform-*d*)  $\delta$  10.12 (s, 1H), 8.90 (d,  $J = 5.8$  Hz, 2H), 7.74 (d,  $J = 5.9$  Hz, 3H).  $^{13}\text{C}$  NMR (151 MHz, Chloroform-*d*)  $\delta$  191.48, 151.27, 141.43, 122.13.

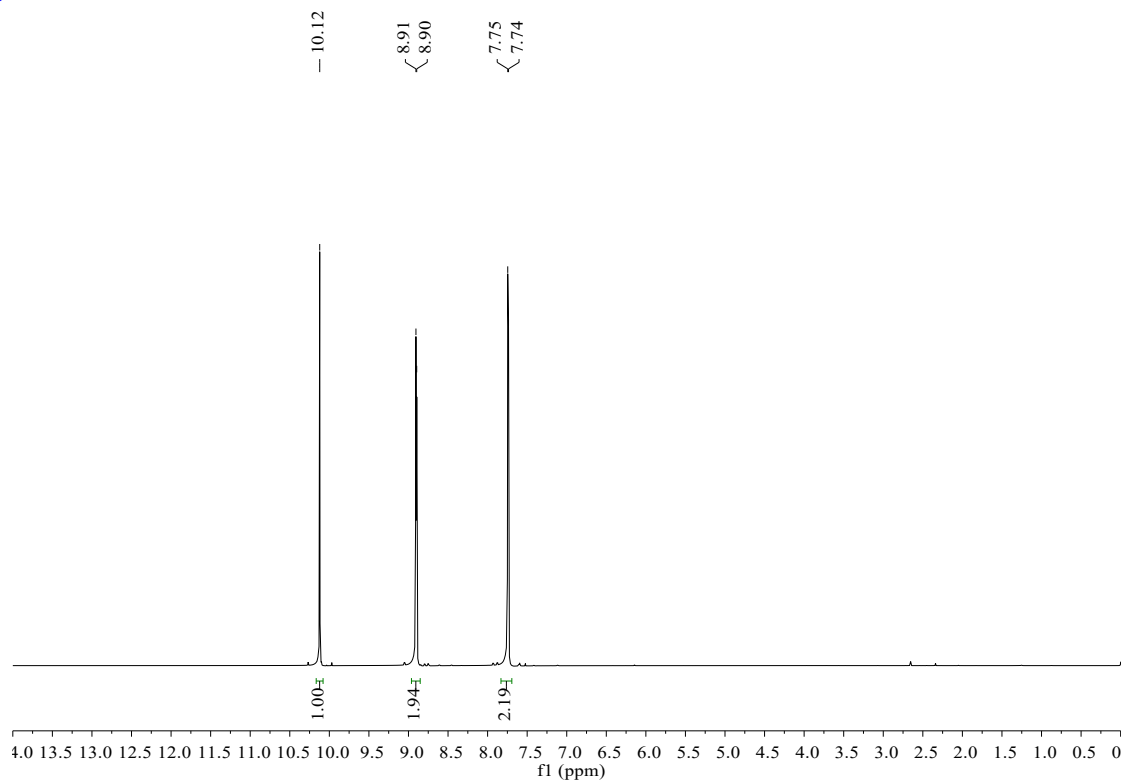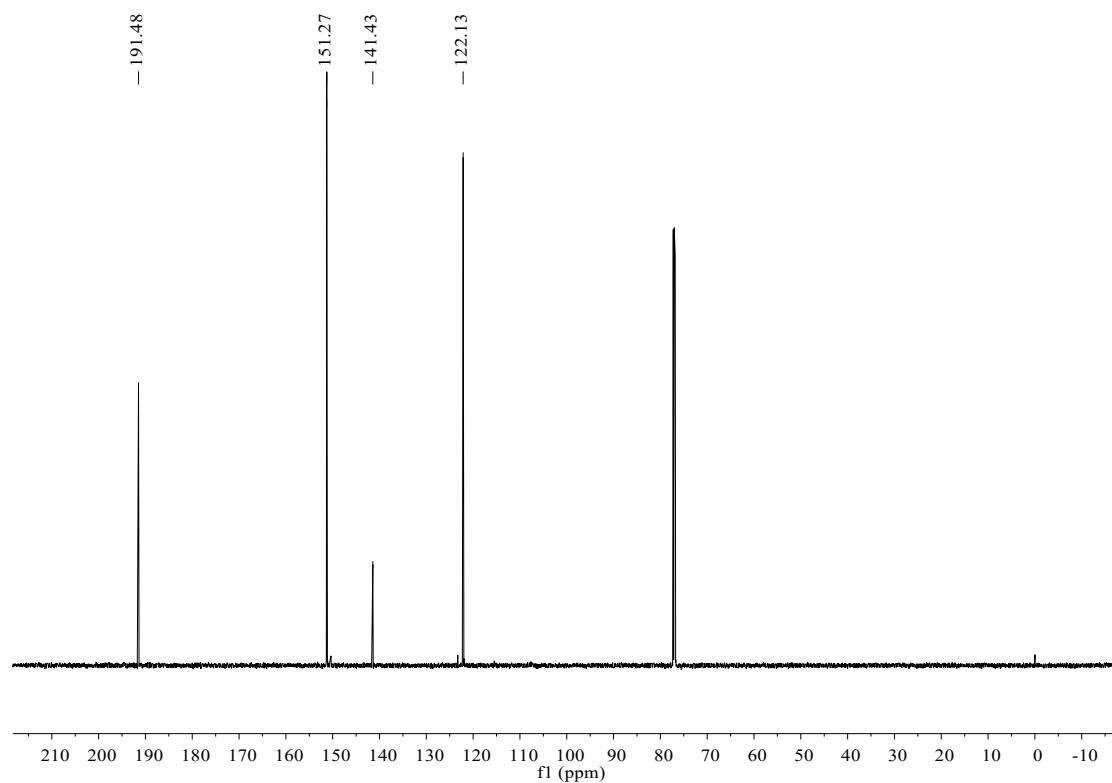

Figure S36  $^1\text{H}$  and  $^{13}\text{C}$  NMR spectrogram of 4-pyridinaldehyde

### Cinnamaldehyde

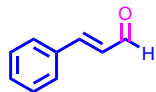

$^1\text{H}$  NMR (600 MHz, Chloroform-*d*)  $\delta$  9.70 (s, 1H), 7.56 (dd,  $J = 7.3, 2.2$  Hz, 2H), 7.51 – 7.39 (m, 4H), 6.72 (dd,  $J = 15.9, 7.7$  Hz, 1H).  $^{13}\text{C}$  NMR (151 MHz, Chloroform-*d*)  $\delta$  193.80, 152.88, 134.01, 131.32, 129.14, 128.57 (d,  $J = 9.7$  Hz).

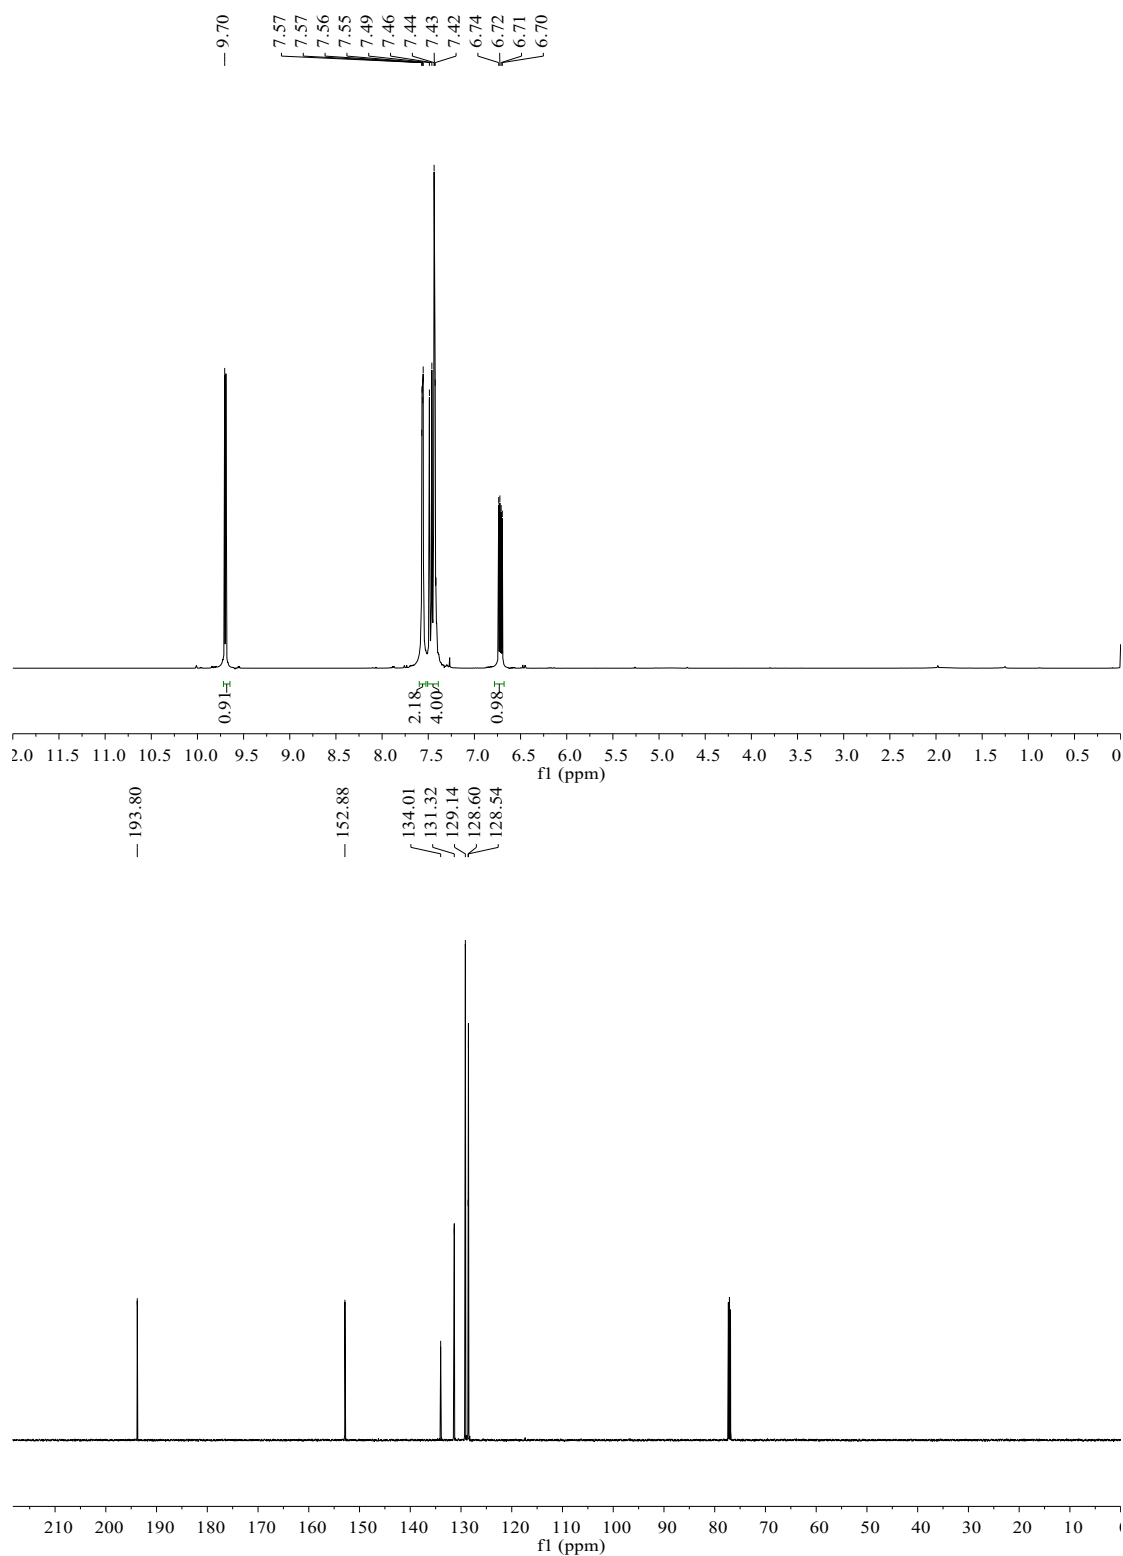

Figure S37  $^1\text{H}$  and  $^{13}\text{C}$  NMR spectrogram of cinnamaldehyde

**Furfural**

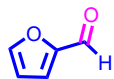

$^1\text{H}$  NMR (600 MHz, Chloroform-*d*)  $\delta$  9.67 (s, 1H), 7.71 (s, 1H), 6.62 (s, 1H).  $^{13}\text{C}$  NMR (151 MHz, Chloroform-*d*)  $\delta$  177.90, 153.01, 148.08, 121.01, 112.59.

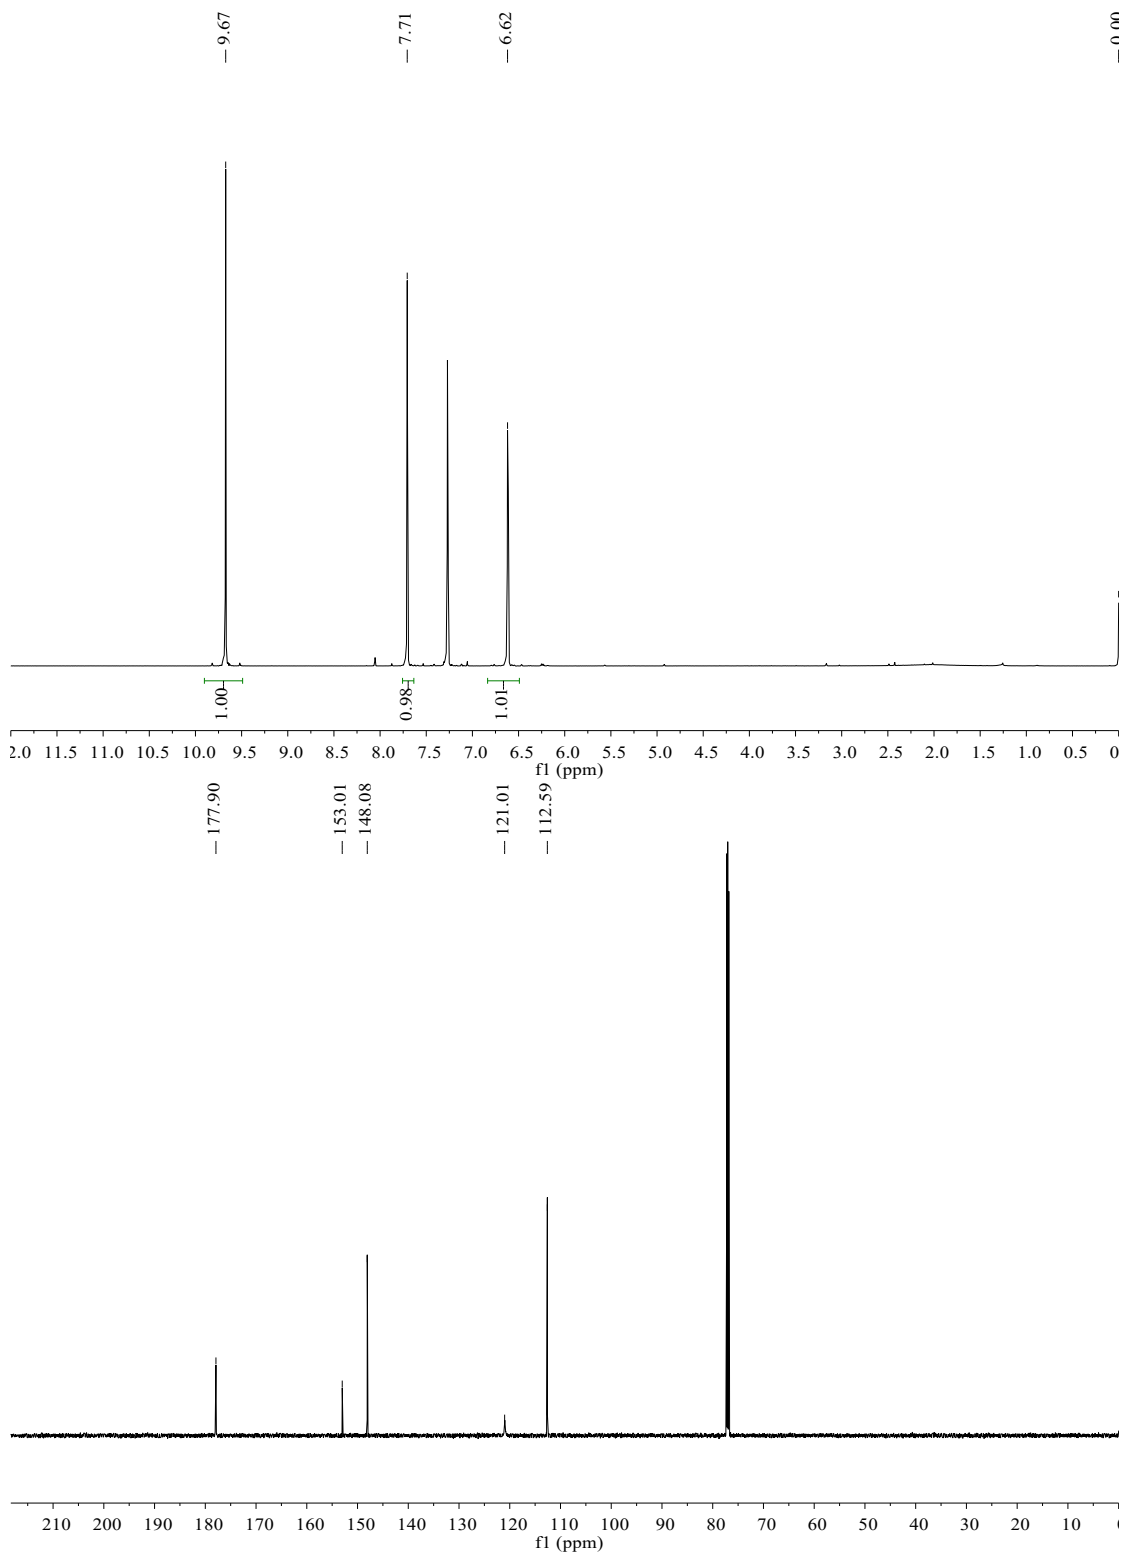

**Figure S38  $^1\text{H}$  and  $^{13}\text{C}$  NMR spectrogram of furfural**

**2, 5-Diformylfuran**

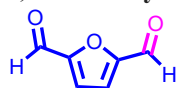

$^1\text{H}$  NMR (600 MHz, Chloroform-*d*)  $\delta$  9.87 (s, 2H), 7.35 (s, 2H).  $^{13}\text{C}$  NMR (151 MHz, Chloroform-*d*)  $\delta$  179.25, 154.22, 119.26.

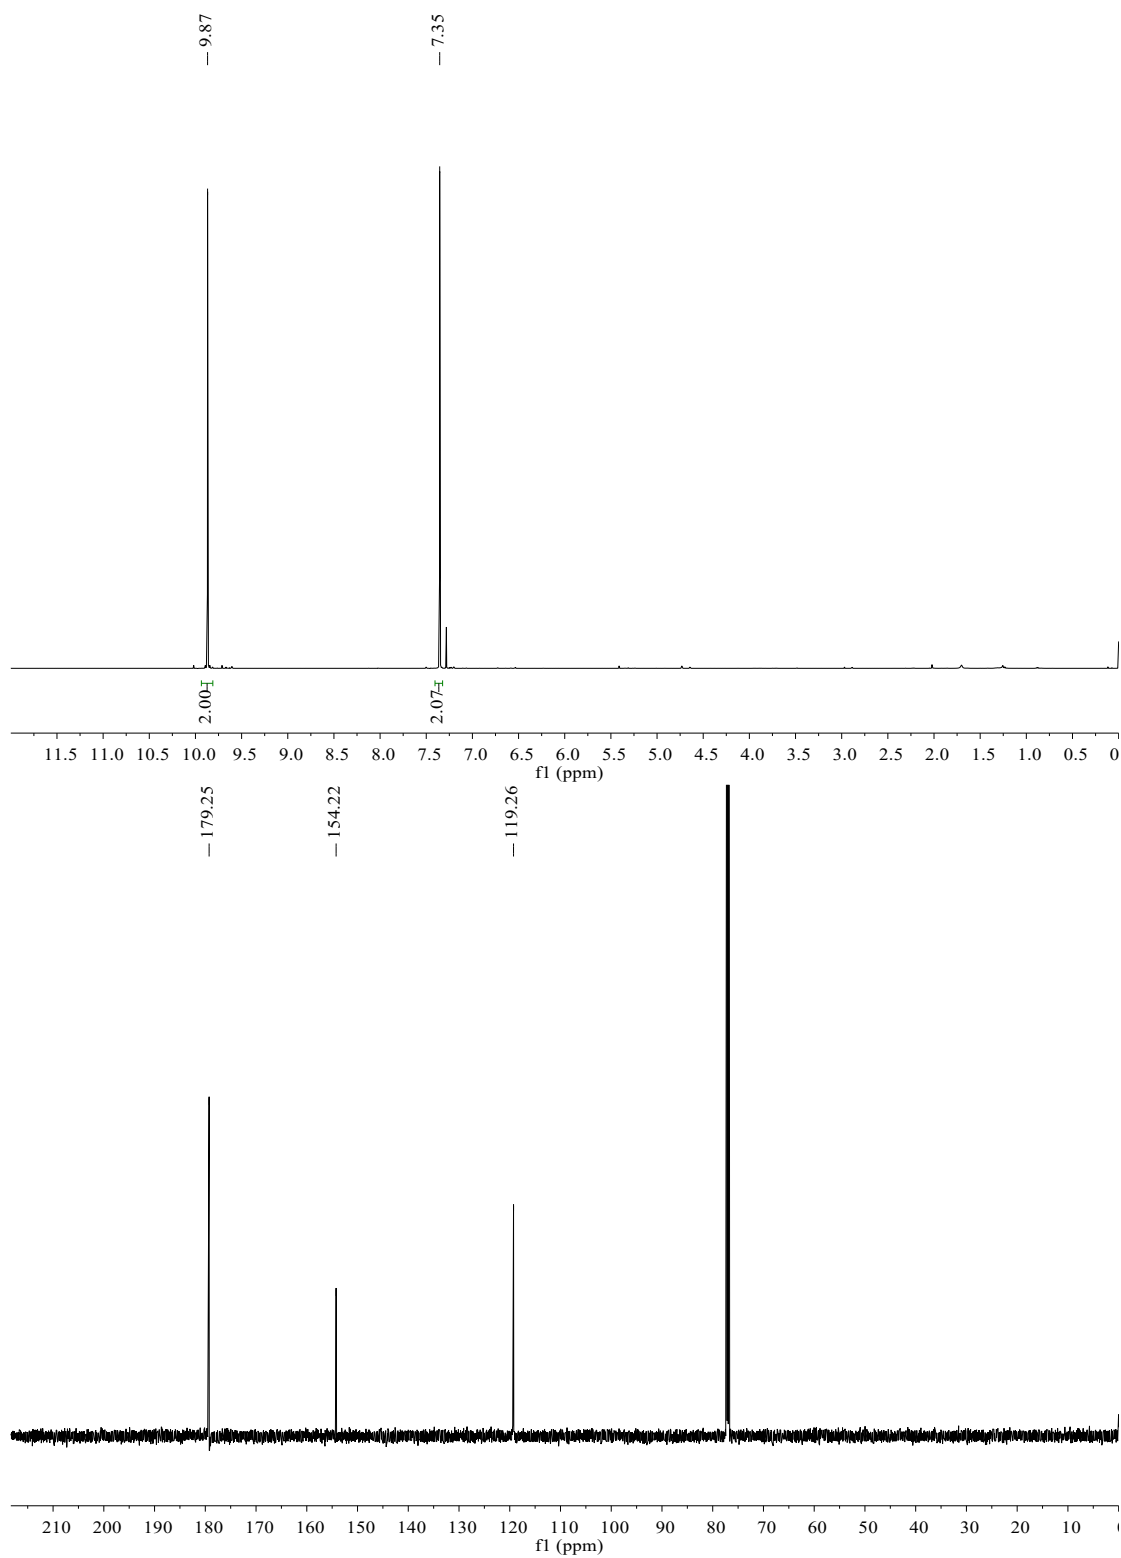

**Figure S39  $^1\text{H}$  and  $^{13}\text{C}$  NMR spectrogram of 2, 5-diformylfuran**

### 5-Methyl furfural

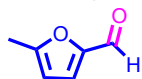

$^1\text{H}$  NMR (600 MHz, Chloroform-*d*)  $\delta$  9.51 (s, 1H), 7.17 (d,  $J = 3.5$  Hz, 1H), 6.24 (d,  $J = 3.4$  Hz, 1H), 2.43 (s, 3H).  $^{13}\text{C}$  NMR (151 MHz, Chloroform-*d*)  $\delta$  176.92, 159.86, 151.92, 109.50, 14.11.

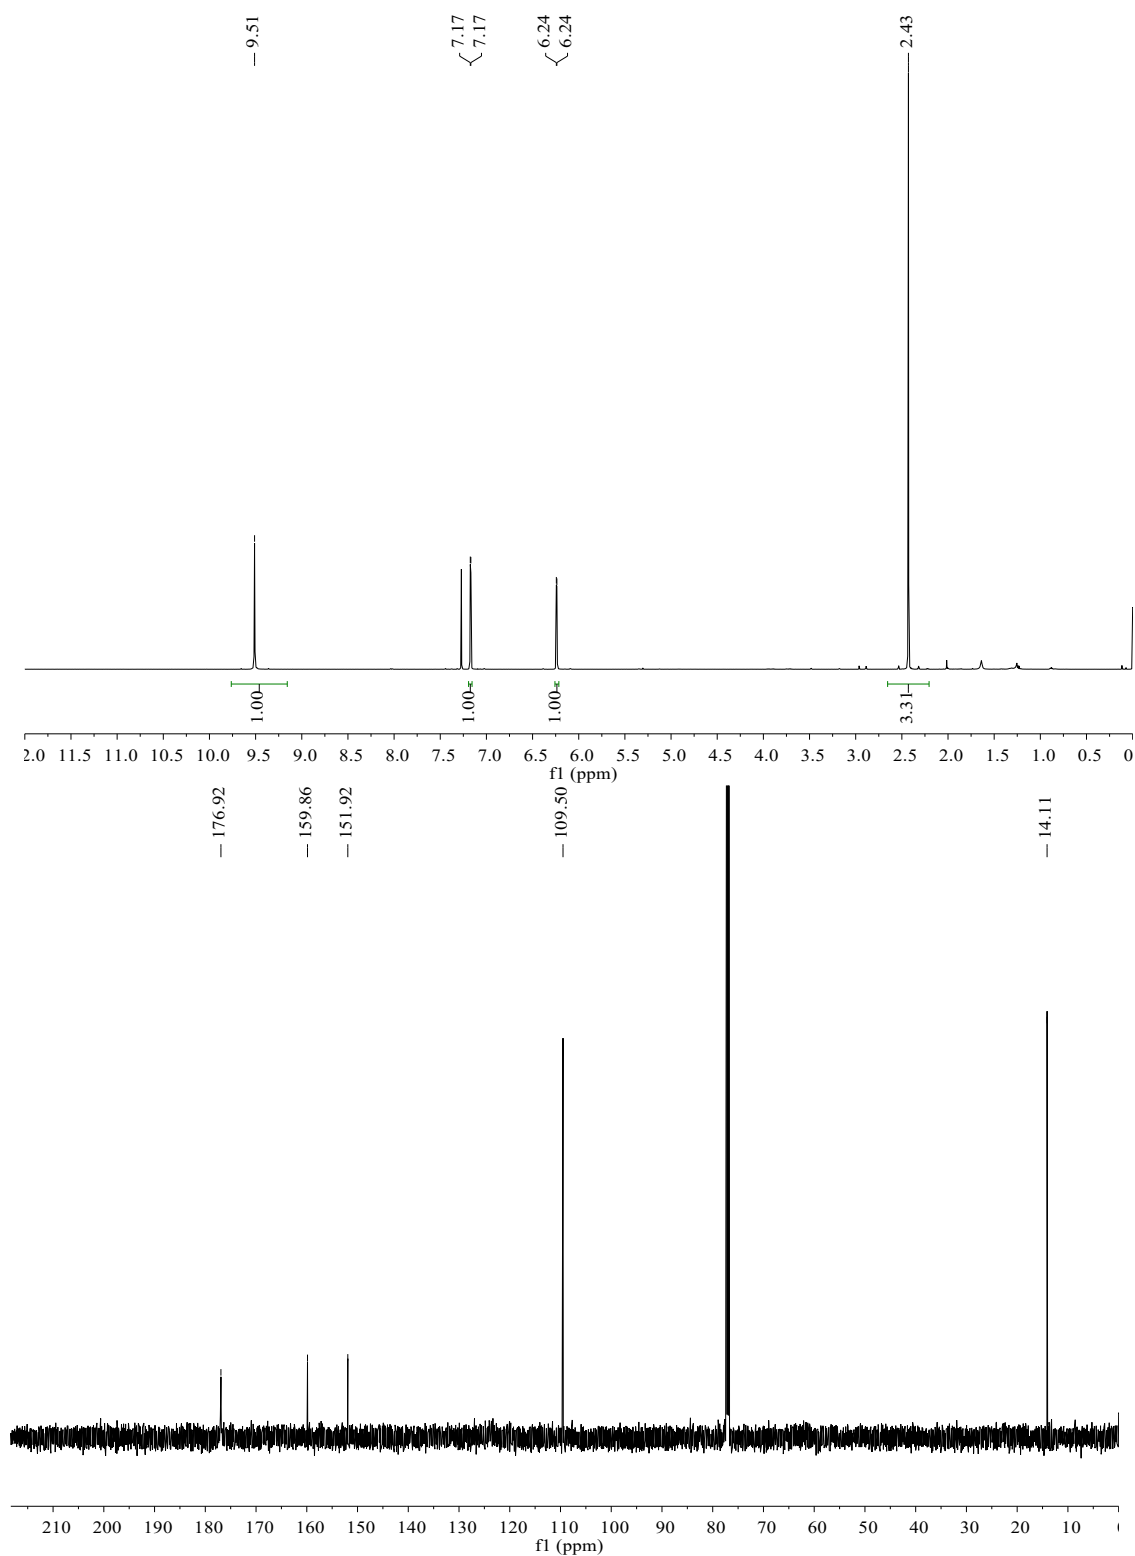

Figure S40  $^1\text{H}$  and  $^{13}\text{C}$  NMR spectrogram of 5-methyl furfural

### 5-Carboxy-2-formylfuran

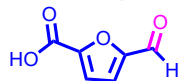

$^1\text{H}$  NMR (600 MHz,  $\text{DMSO-}d_6$ )  $\delta$  9.74 (s, 1H), 7.61 (s, 1H), 7.40 (s, 1H).  $^{13}\text{C}$  NMR (151 MHz,  $\text{DMSO-}d_6$ )  $\delta$  180.38, 159.47, 153.73, 148.61, 122.74, 119.03.

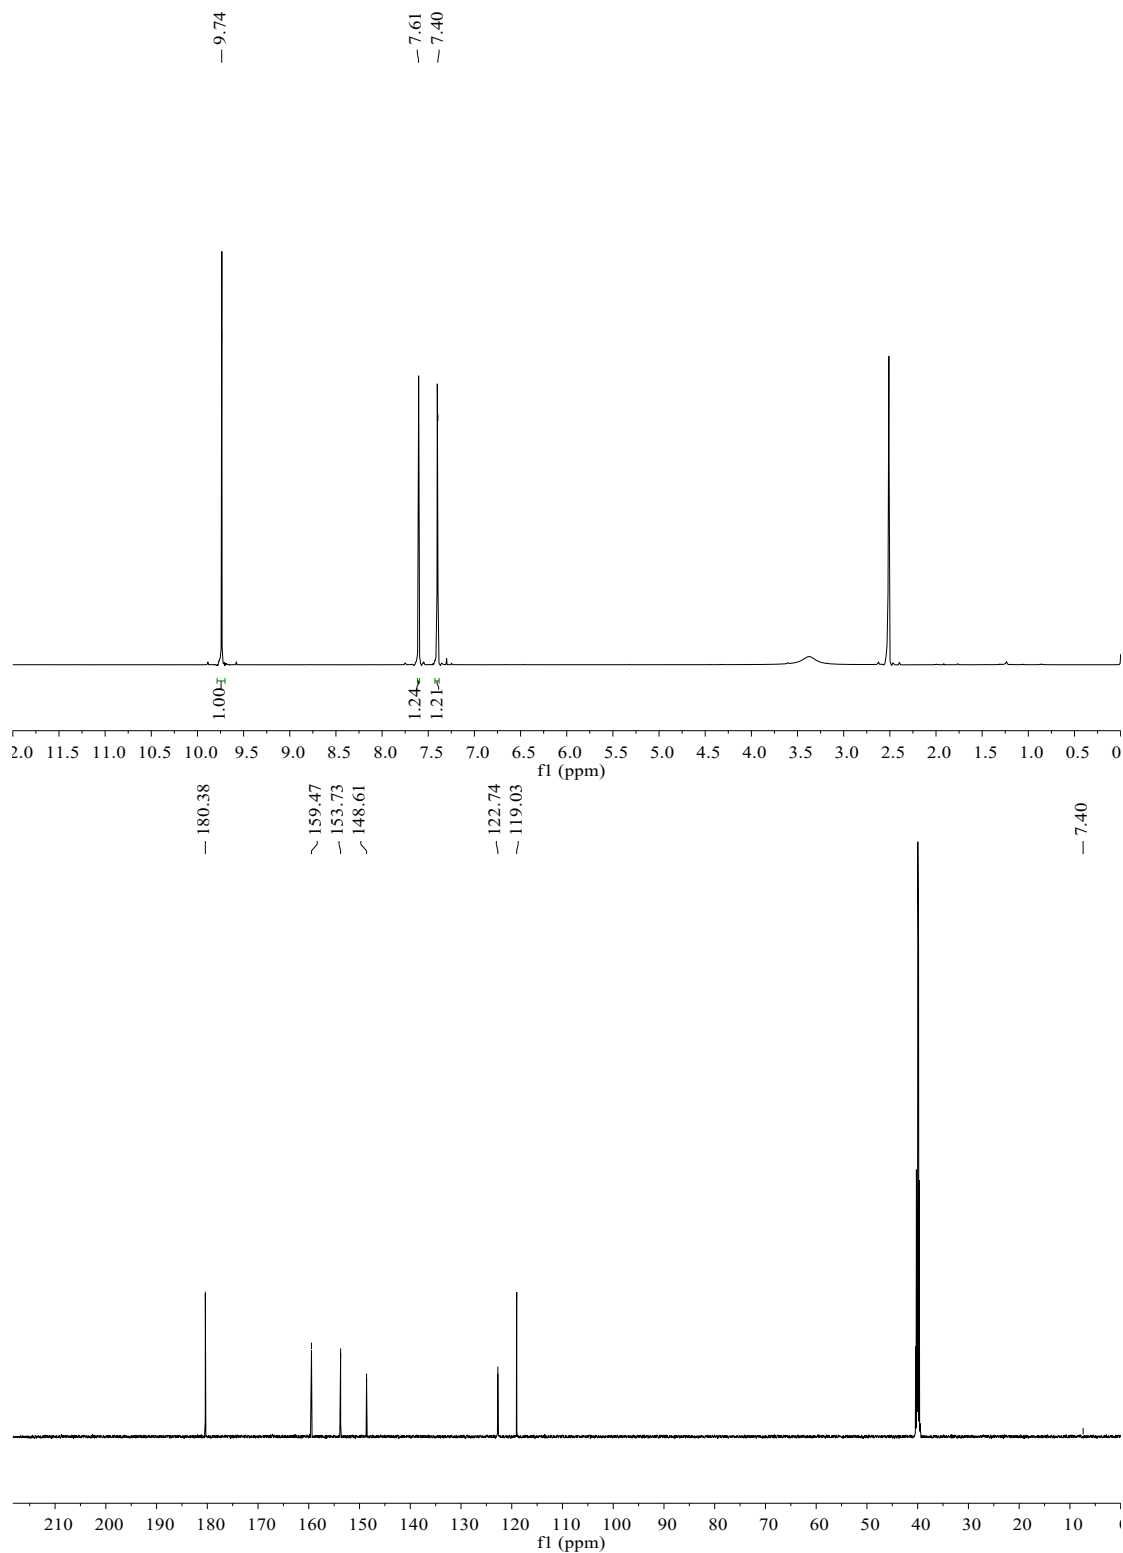

Figure S41  $^1\text{H}$  and  $^{13}\text{C}$  NMR spectrogram of 5-carboxy-2-formylfuran

## 2-Thiophene formaldehyde

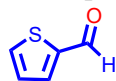

$^1\text{H}$  NMR (600 MHz, Chloroform-*d*)  $\delta$  9.95 (s, 1H), 8.00 – 7.59 (m, 2H), 7.22 (t,  $J = 4.3$  Hz, 2H).  $^{13}\text{C}$  NMR (151 MHz, Chloroform-*d*)  $\delta$  183.01, 144.06, 136.33, 135.14, 128.34.

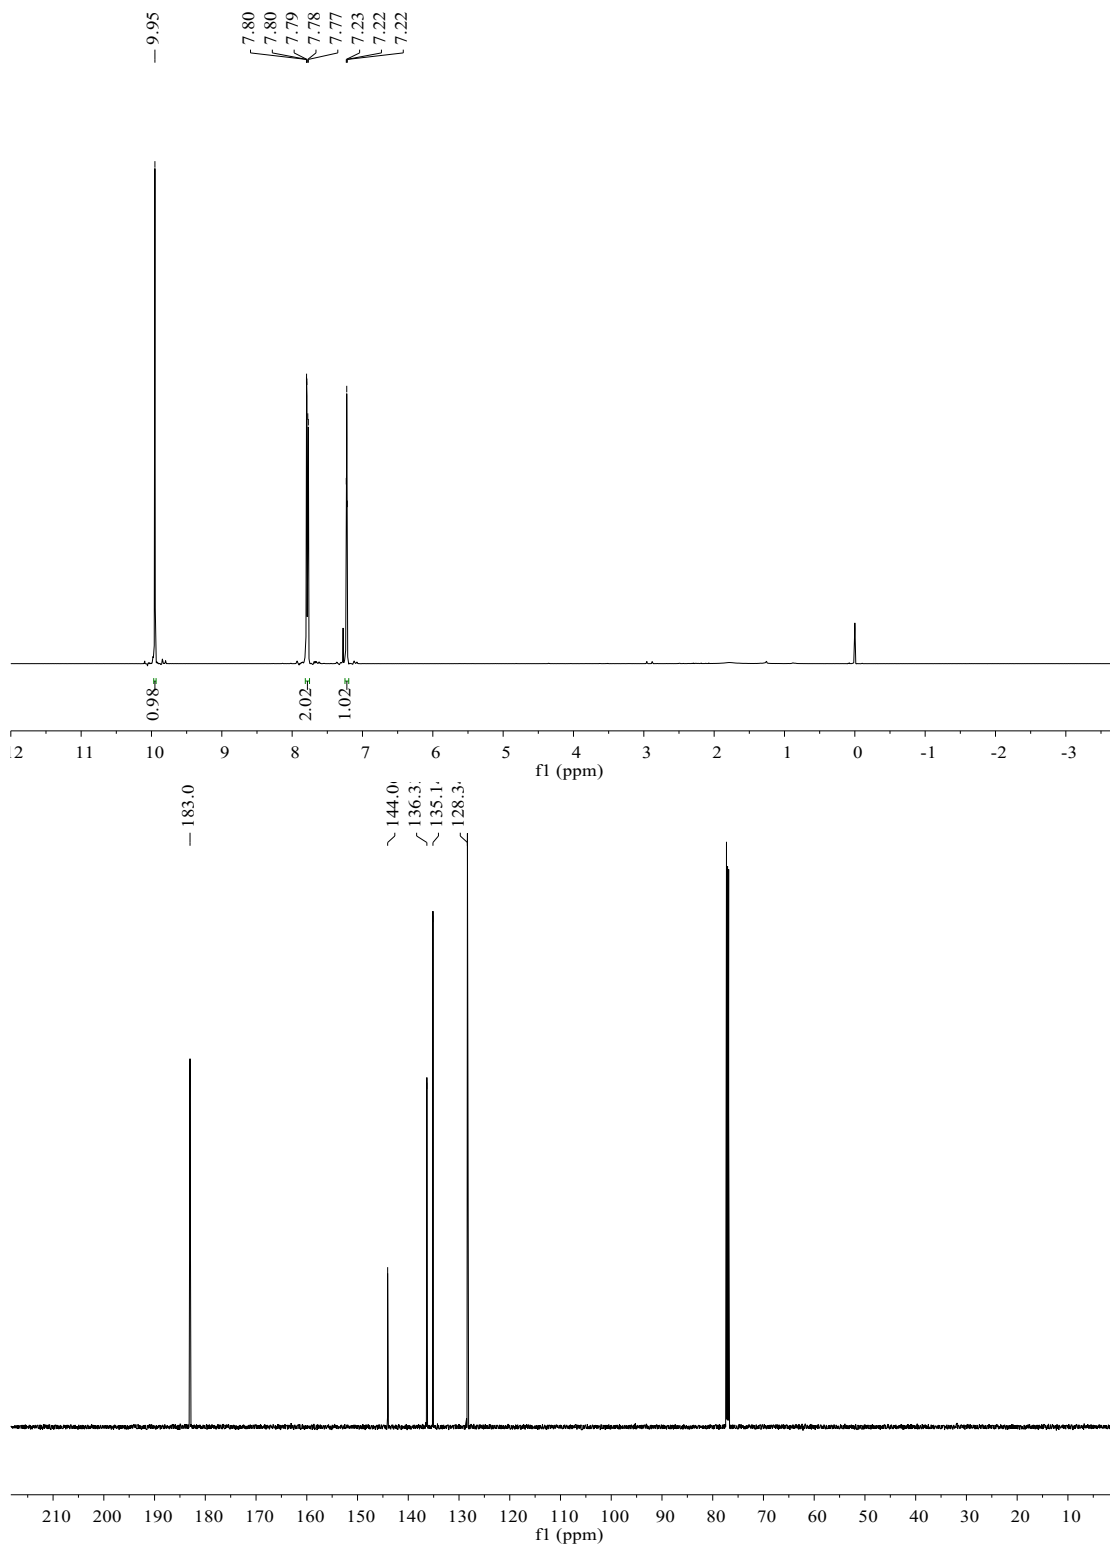

Figure S42  $^1\text{H}$  and  $^{13}\text{C}$  NMR spectrogram of 2-thiophene formaldehyde



#### 4-Quinolinecarboxaldehyde

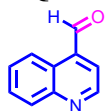

$^1\text{H}$  NMR (600 MHz, Chloroform-*d*)  $\delta$  10.53 (s, 1H), 9.22 (d,  $J = 4.2$  Hz, 1H), 9.04 (d,  $J = 9.2$  Hz, 1H), 8.24 (d,  $J = 8.4$  Hz, 1H), 7.89 – 7.69 (m, 3H), 7.26 (s, 1H).  $^{13}\text{C}$  NMR (151 MHz, Chloroform-*d*)  $\delta$  192.88, 150.46, 149.28, 136.78, 130.21, 130.05, 129.41, 125.82, 124.44, 123.89.

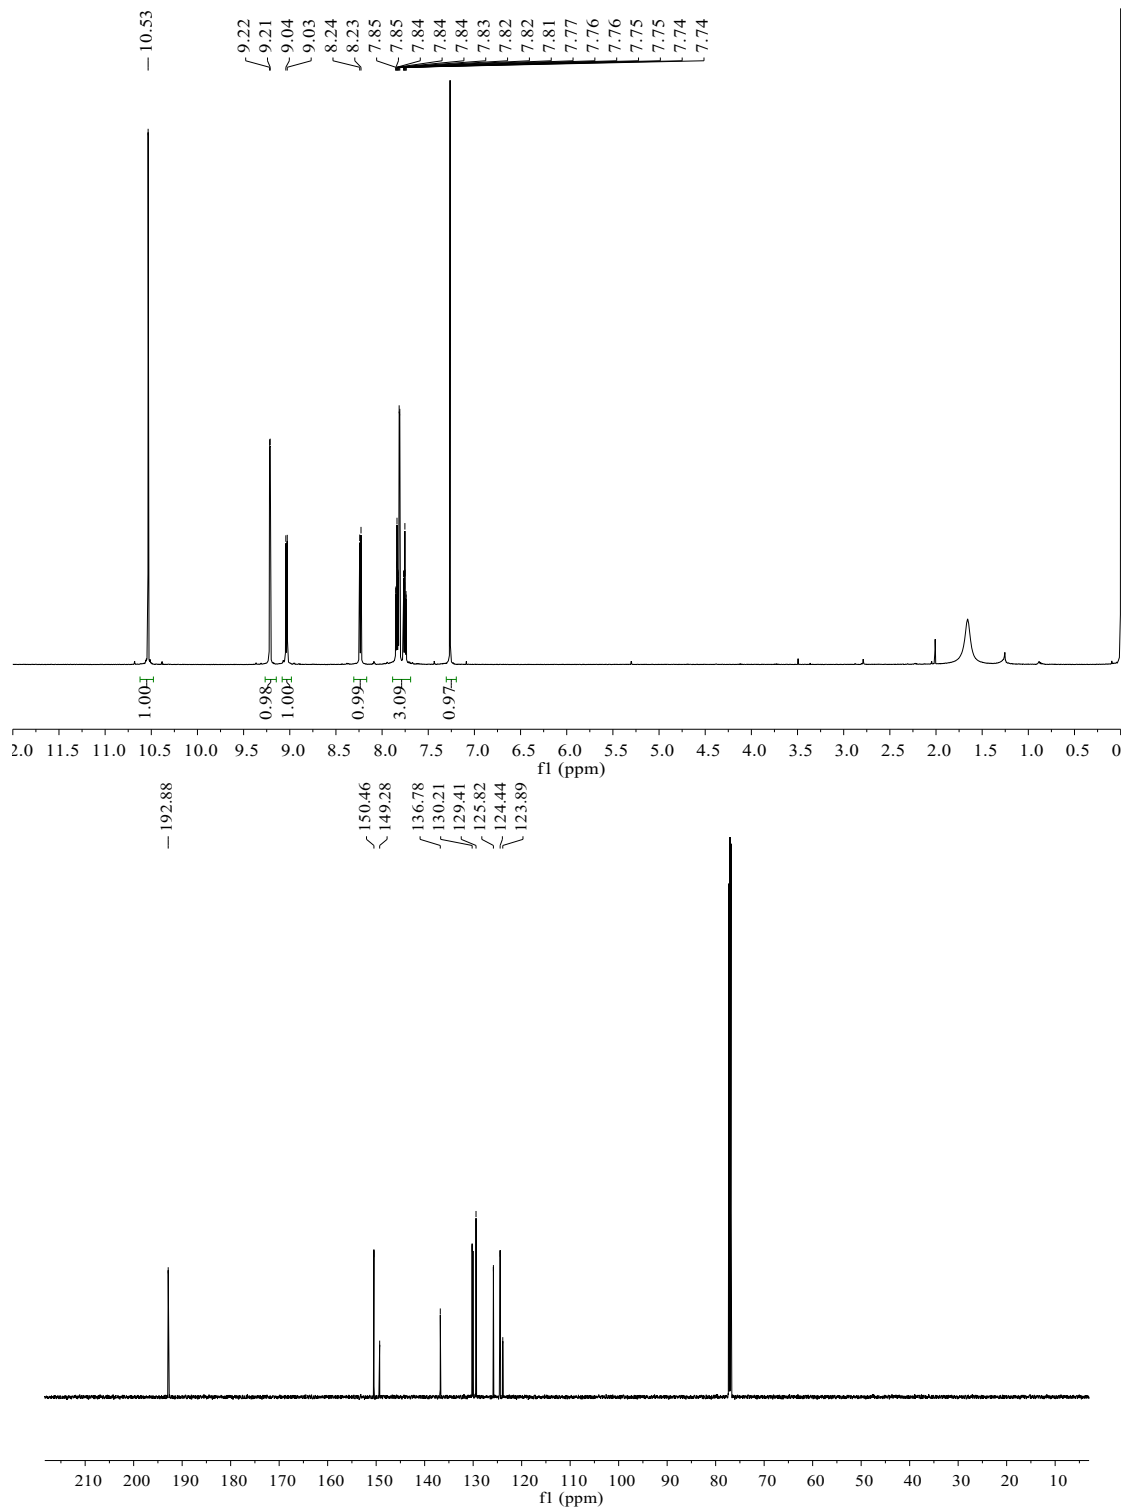

Figure S43  $^1\text{H}$  and  $^{13}\text{C}$  NMR spectrogram of 4-quinolinecarboxaldehyde

### Indole-3-carboxaldehyde

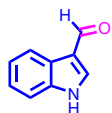

$^1\text{H}$  NMR (600 MHz, Chloroform-*d*)  $\delta$  10.08 (s, 1H), 8.73 (s, 1H), 8.33 (d,  $J = 8.6$  Hz, 1H), 7.94-7.71 (m, 1H), 7.45 (s, 1H), 7.36 - 7.30 (m, 2H).  $^{13}\text{C}$  NMR (151 MHz, DMSO-*d*<sub>6</sub>)  $\delta$  185.42, 138.92, 137.55, 124.61, 123.92, 122.58, 121.30, 118.65, 112.89.

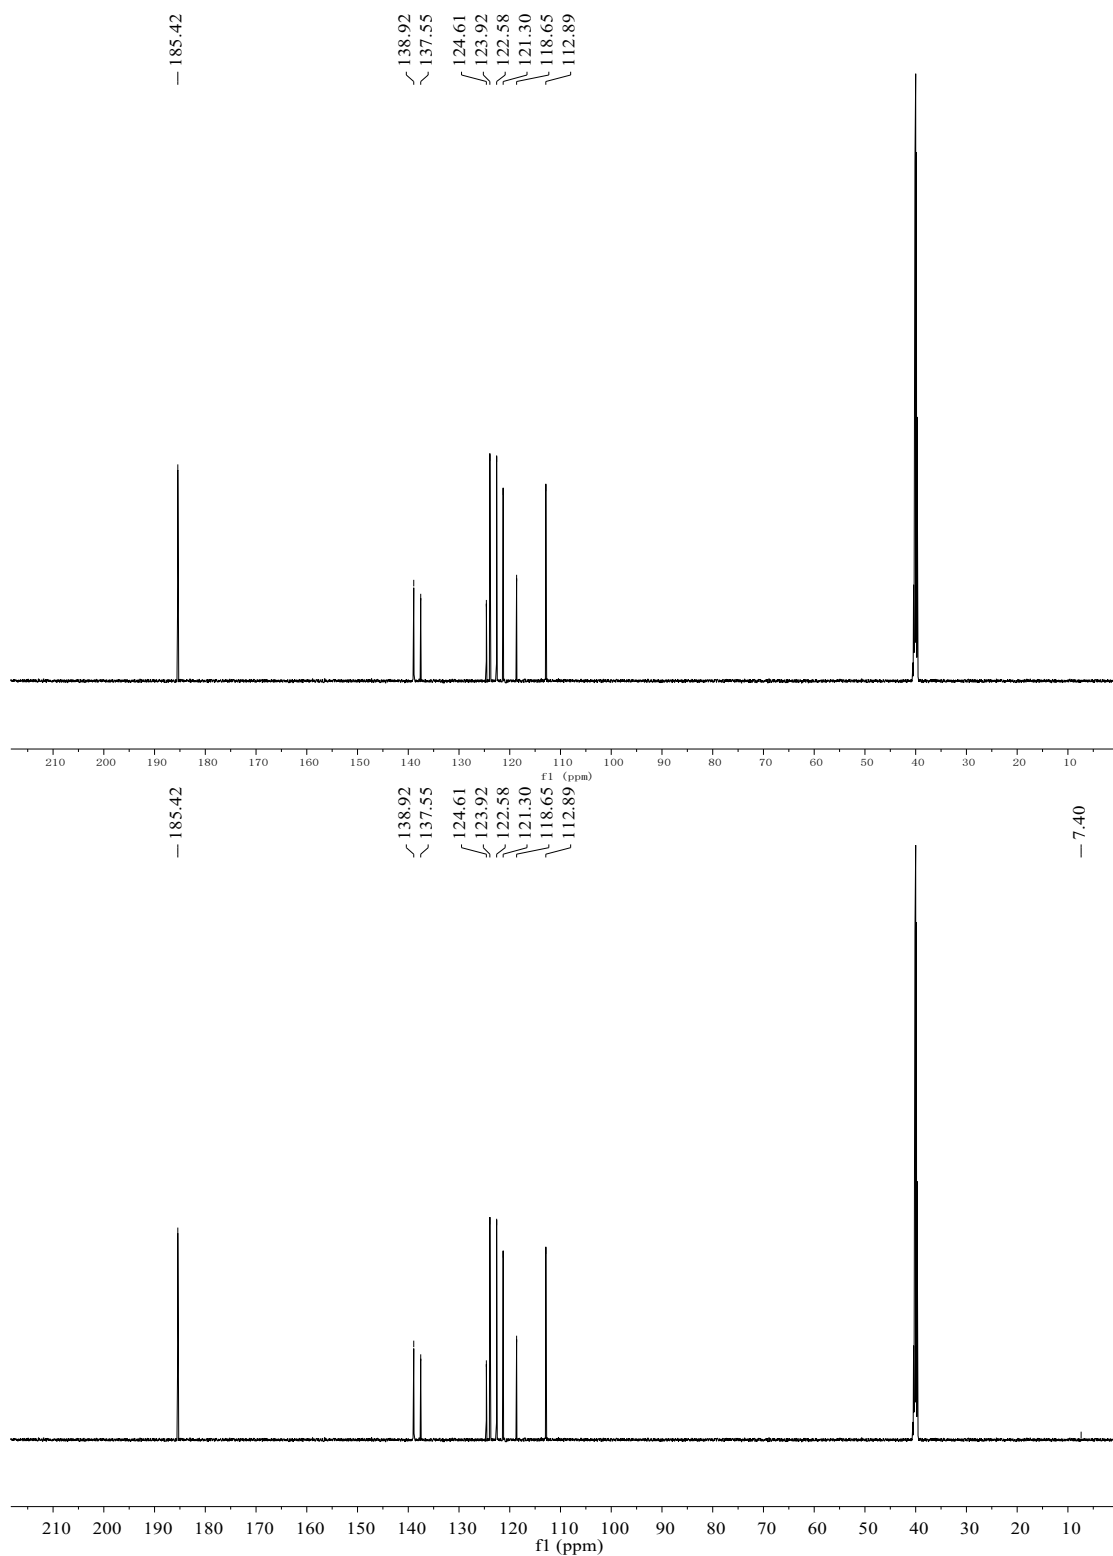

Figure S44  $^1\text{H}$  and  $^{13}\text{C}$  NMR spectrogram of indole-3-carboxaldehyde

### Cyclohexanone

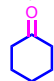

$^1\text{H}$  NMR (600 MHz, Chloroform-*d*)  $\delta$  2.34 (t,  $J = 6.7$  Hz, 2H), 1.87 (p,  $J = 6.2$  Hz, 2H), 1.75 – 1.69 (m, 1H).  $^{13}\text{C}$  NMR (151 MHz, Chloroform-*d*)  $\delta$  212.03, 41.92, 26.98, 24.95.

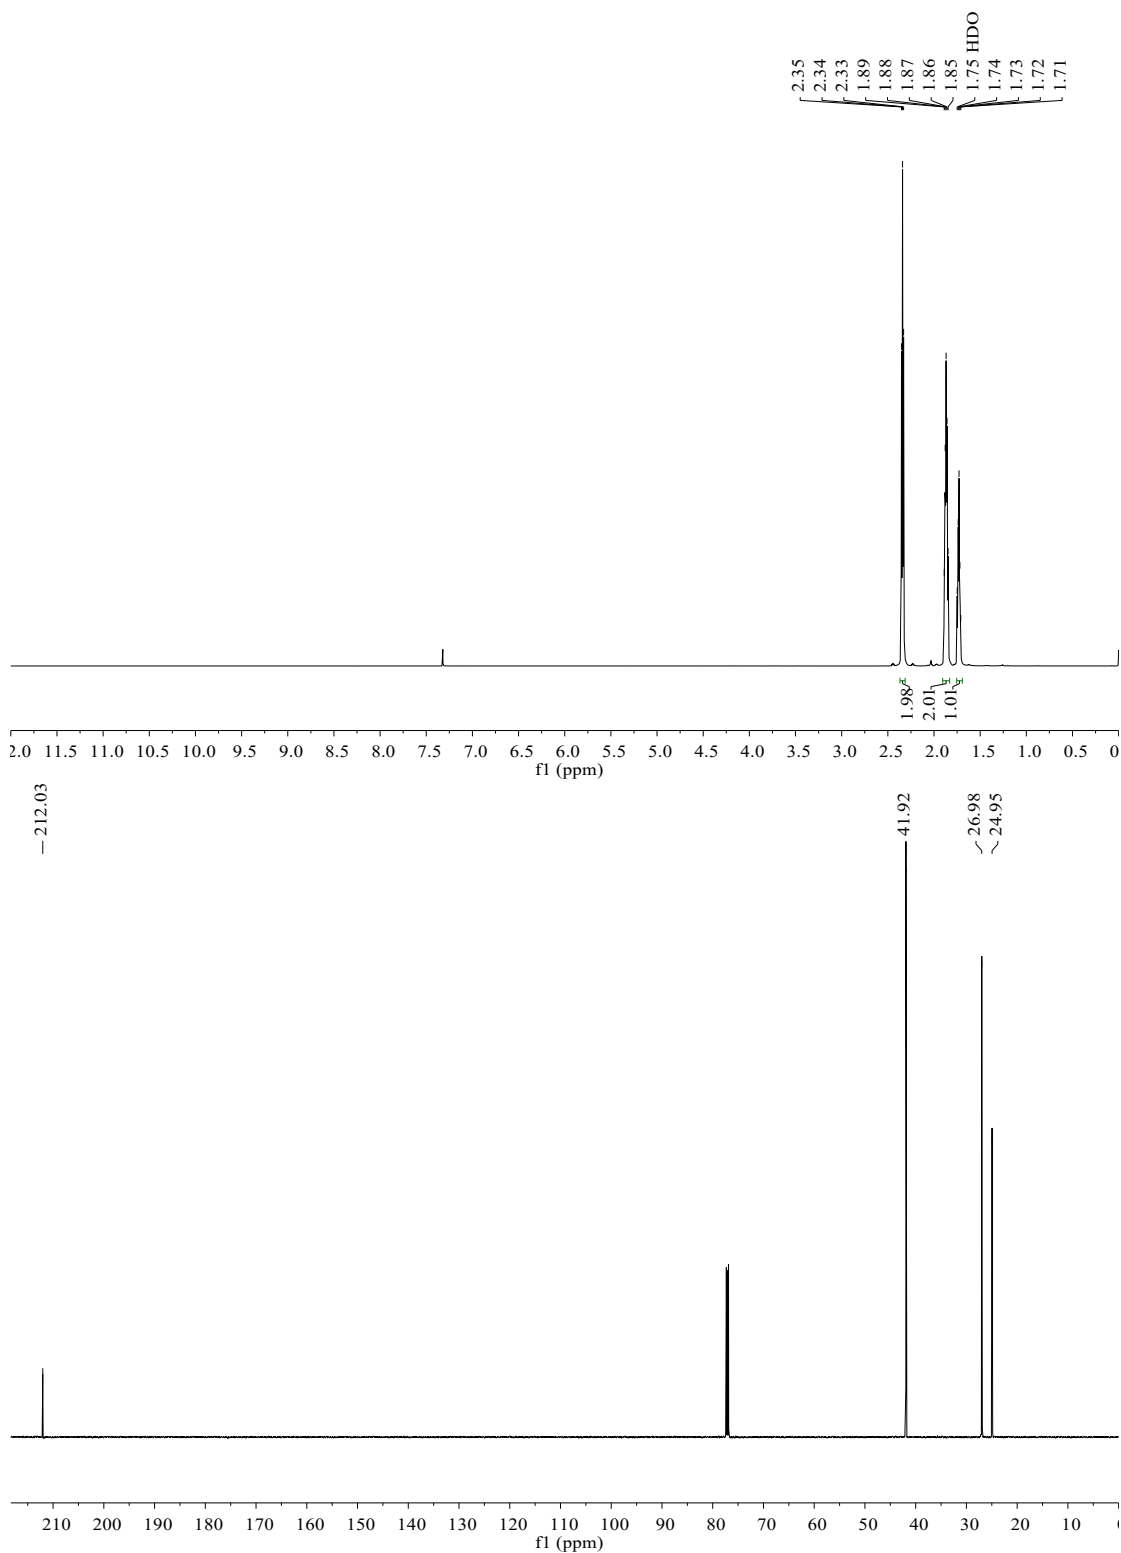

Figure S45  $^1\text{H}$  and  $^{13}\text{C}$  NMR spectrogram of cyclohexanone

**n-Propionaldehyde**

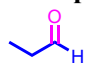

$^1\text{H}$  NMR (600 MHz, Chloroform-*d*)  $\delta$  9.80 (t,  $J = 1.3$  Hz, 1H), 2.48 (qd,  $J = 7.4, 1.4$  Hz, 2H), 1.11 (t,  $J = 7.4$  Hz, 3H).  $^{13}\text{C}$  NMR (151 MHz, Chloroform-*d*)  $\delta$  203.06, 37.25, 6.01.

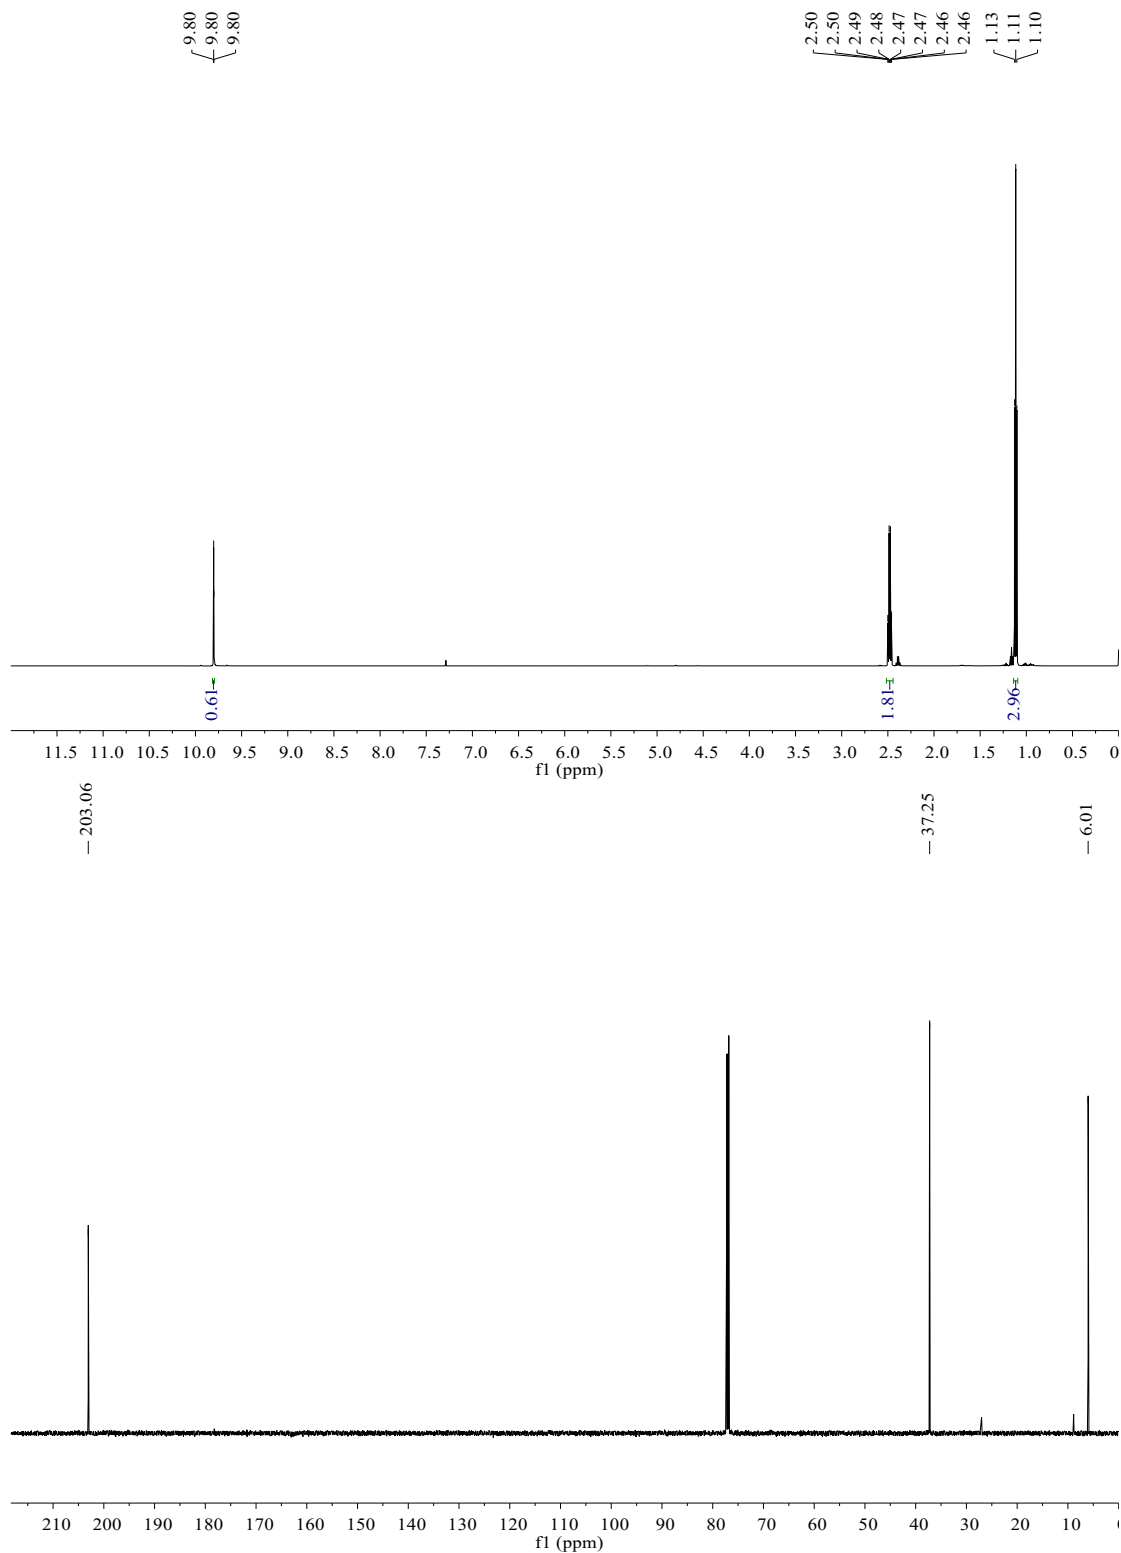

**Figure S46  $^1\text{H}$  and  $^{13}\text{C}$  NMR spectrogram of n-propionaldehyde**

**n-Butylaldehyde**

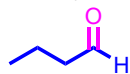

<sup>1</sup>H NMR (600 MHz, Chloroform-*d*) δ 9.77 (s, 1H), 2.42 (tdd, J = 7.3, 1.8, 0.8 Hz, 2H), 1.69 – 1.64 (m, 2H), 0.96 (dd, J = 7.4, 0.8 Hz, 3H). <sup>13</sup>C NMR (151 MHz, Chloroform-*d*) δ 202.89, 45.71, 15.58, 13.64.

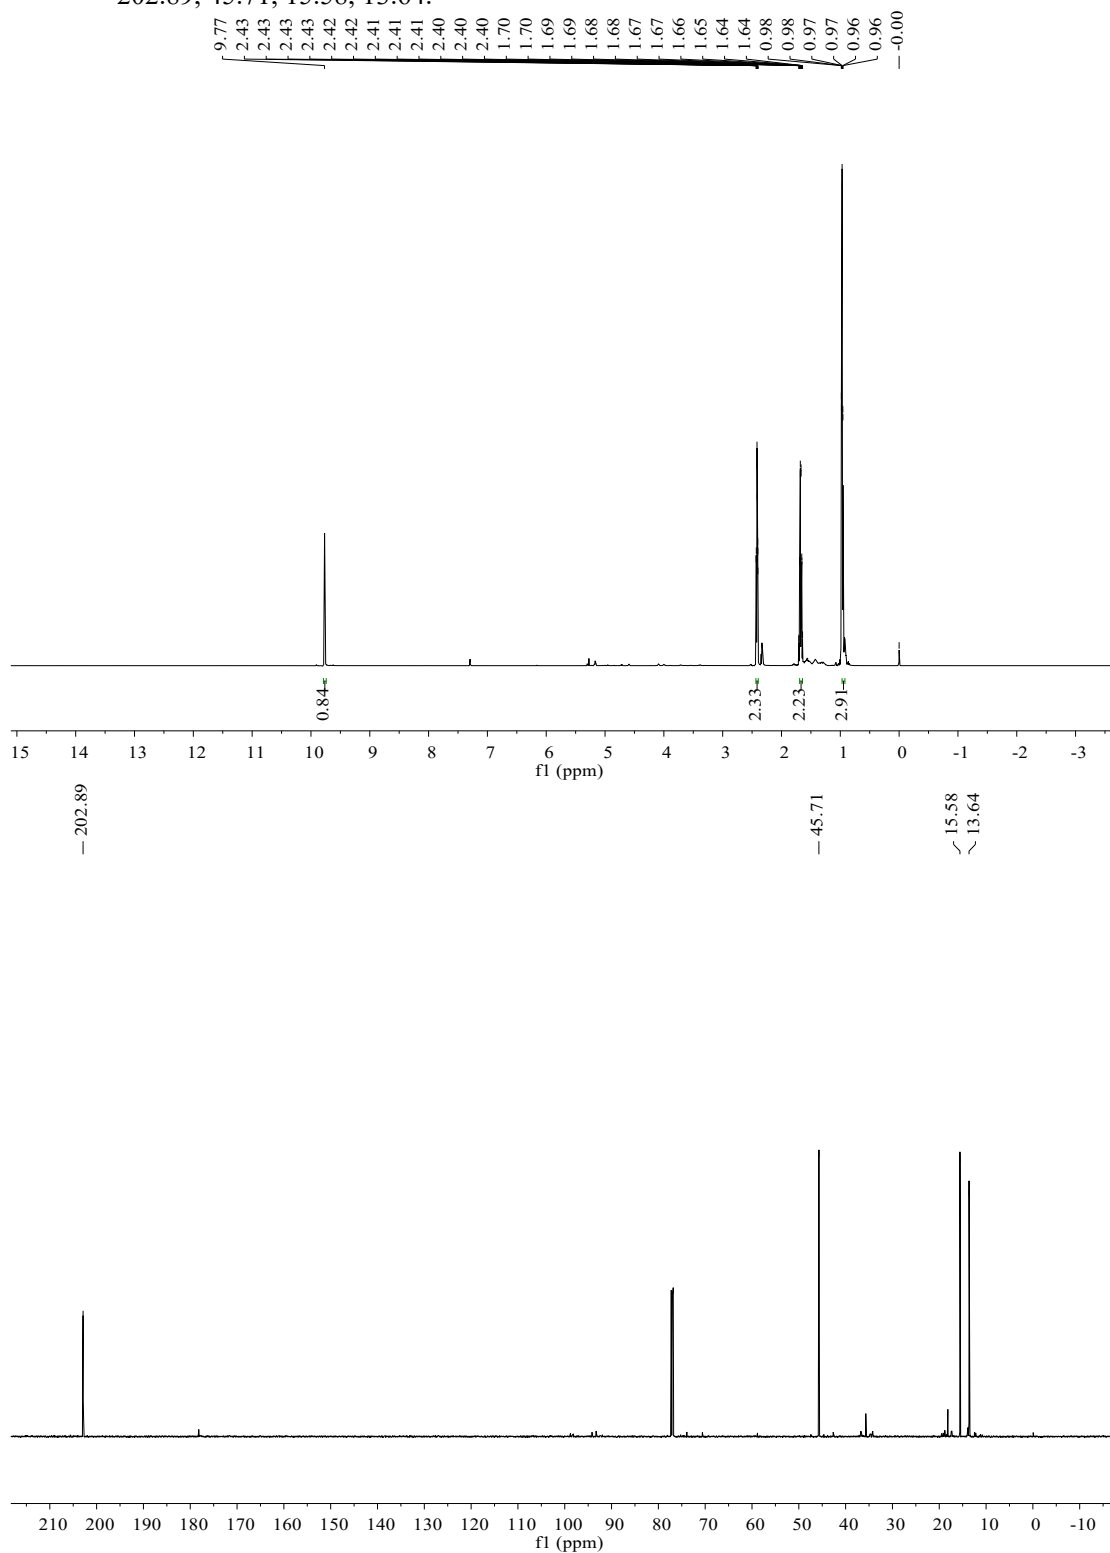

**Figure S47 <sup>1</sup>H and <sup>13</sup>C NMR spectrogram of n-butylaldehyde**

**n-Hexanal**

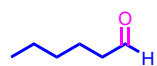

**<sup>1</sup>H NMR (600 MHz, Chloroform-*d*)** δ 9.77 (s, 1H), 2.42 (dt, *J* = 7.5, 4.6 Hz, 2H), 1.64 (p, *J* = 7.4 Hz, 2H), 1.33 (td, *J* = 8.1, 7.0, 4.7 Hz, 4H), 0.92 (s, 3H). **<sup>13</sup>C NMR (151 MHz, Chloroform-*d*)** δ 203.02, 43.88, 31.30, 22.40, 21.75, 13.86.

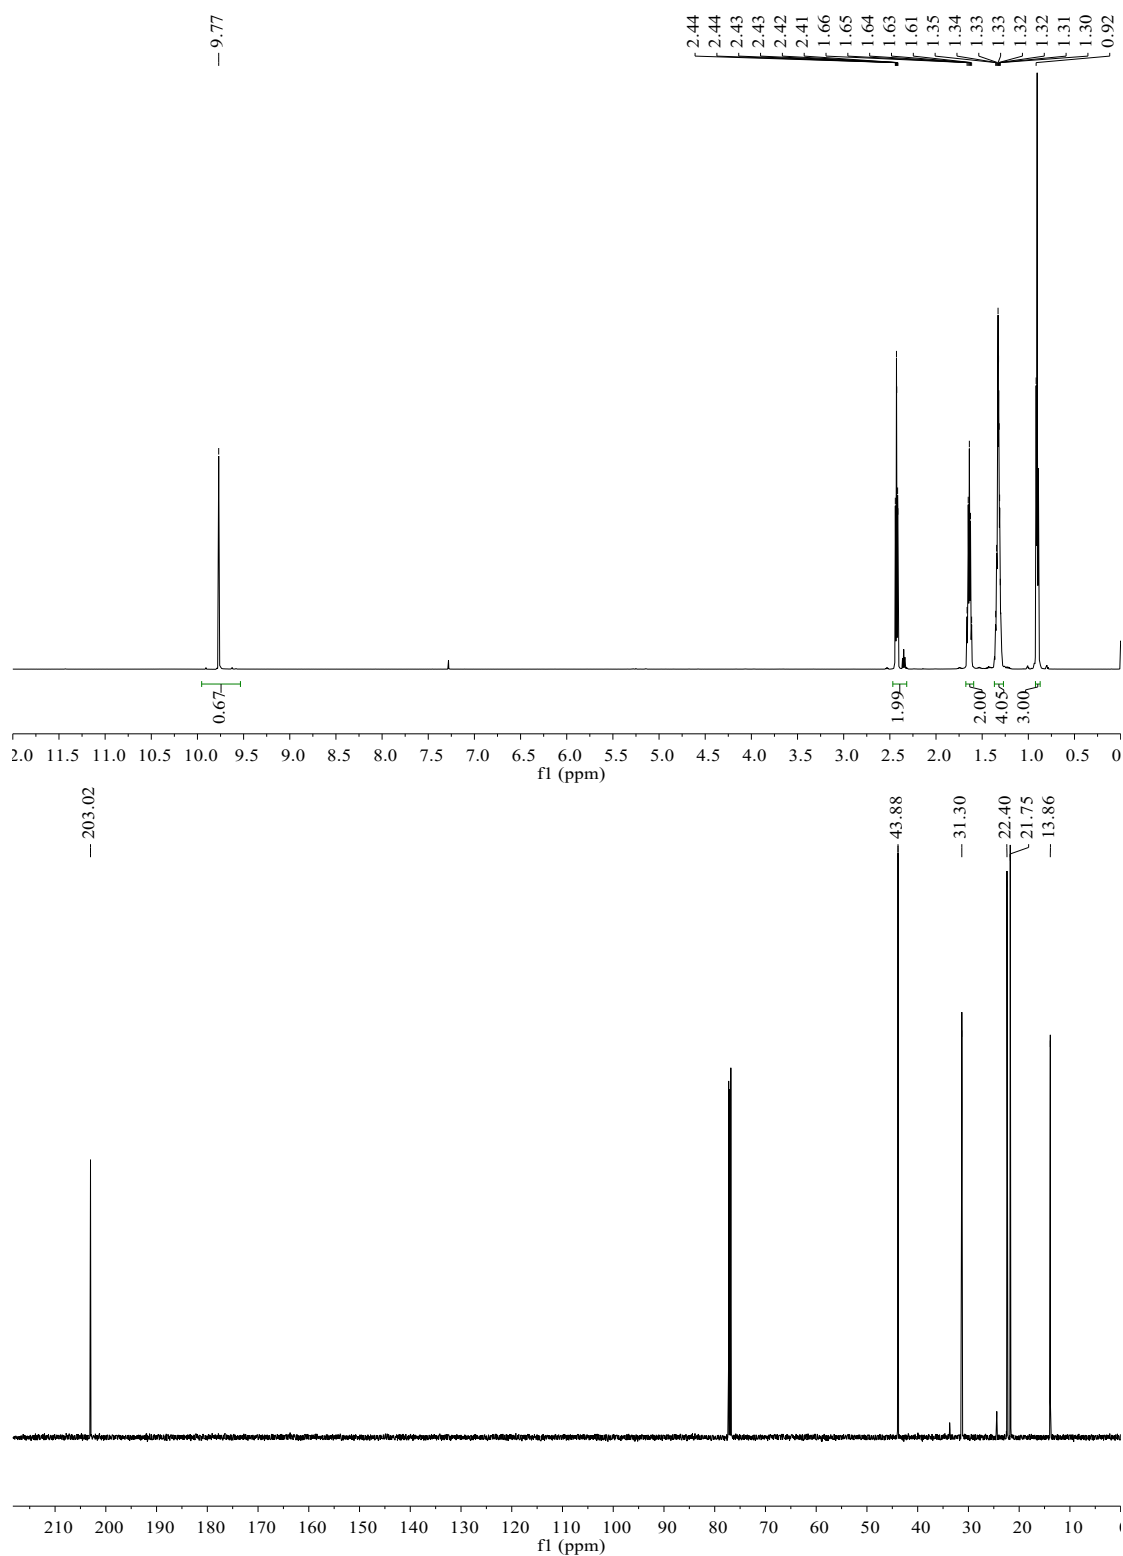

**Figure S48 <sup>1</sup>H and <sup>13</sup>C NMR spectrogram of n-hexanal**

### n-Decanal

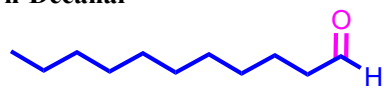

$^1\text{H}$  NMR (600 MHz, Chloroform-*d*)  $\delta$  9.76 (t,  $J = 1.9$  Hz, 1H), 2.42 (td,  $J = 7.4, 1.9$  Hz, 2H), 1.63 (p,  $J = 7.3$  Hz, 2H), 1.29 (dd,  $J = 20.3, 5.4$  Hz, 12H), 0.88 (t,  $J = 7.0$  Hz, 3H).  $^{13}\text{C}$  NMR (151 MHz, Chloroform-*d*)  $\delta$  203.05, 43.94, 31.88 (d,  $J = 6.3$  Hz), 29.37, 22.69, 22.09, 14.11.

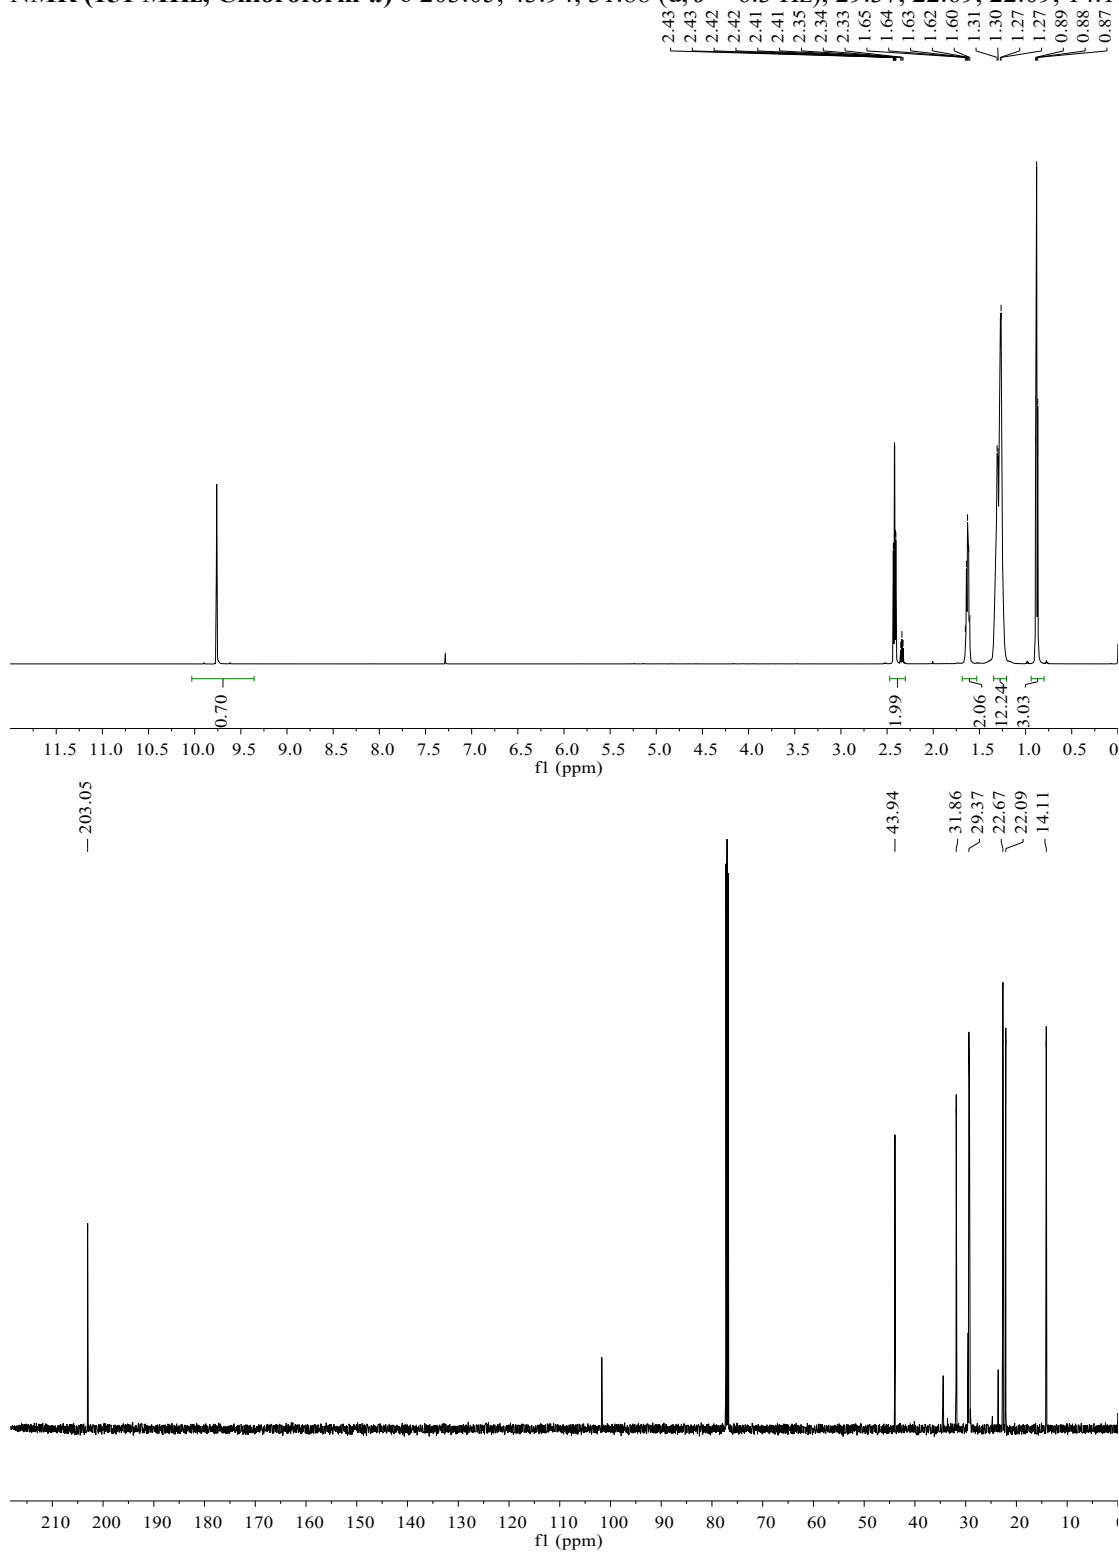

Figure S49  $^1\text{H}$  and  $^{13}\text{C}$  NMR spectrogram of n-decanal

## 6. HPLC/GC, GC-MS/HPLC-MS, AND <sup>1</sup>H NMR DATA

### Acetophenone

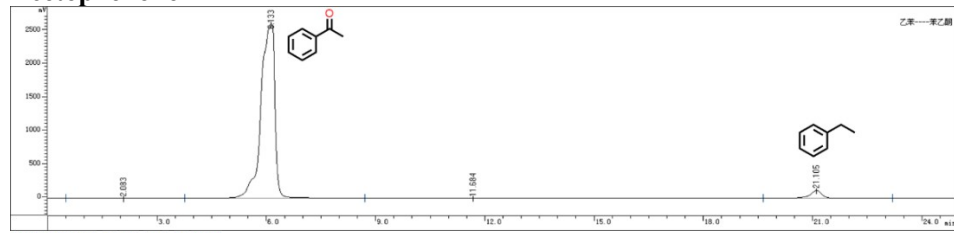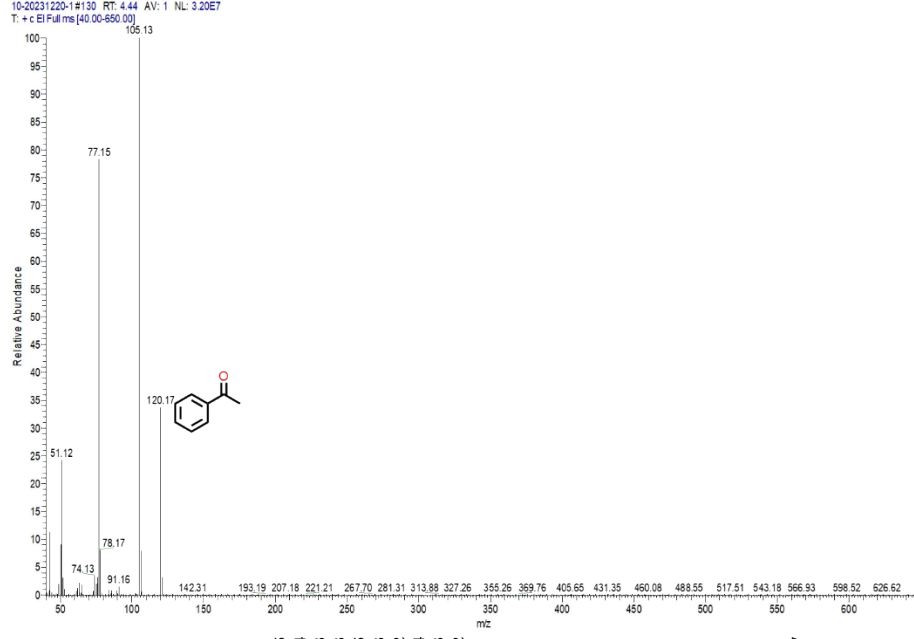

7.95  
7.94  
7.93  
7.93  
7.55  
7.53  
7.52  
7.44  
7.43  
7.42

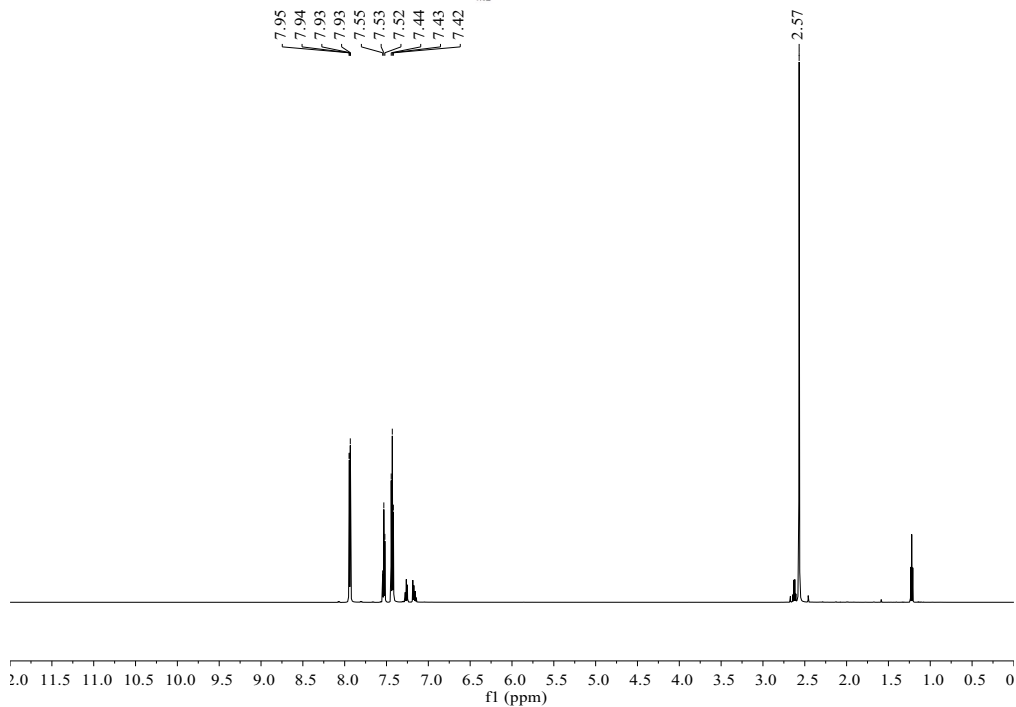

HPLC, GC-MS, and <sup>1</sup>H NMR spectrogram of acetophenone



## 2-Methylacetophenone

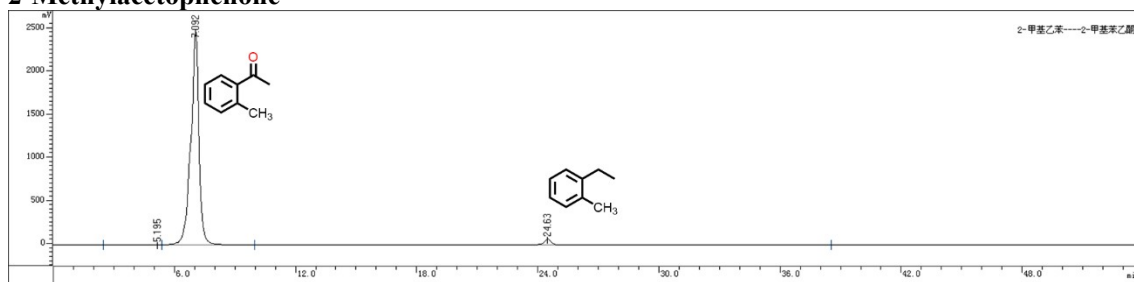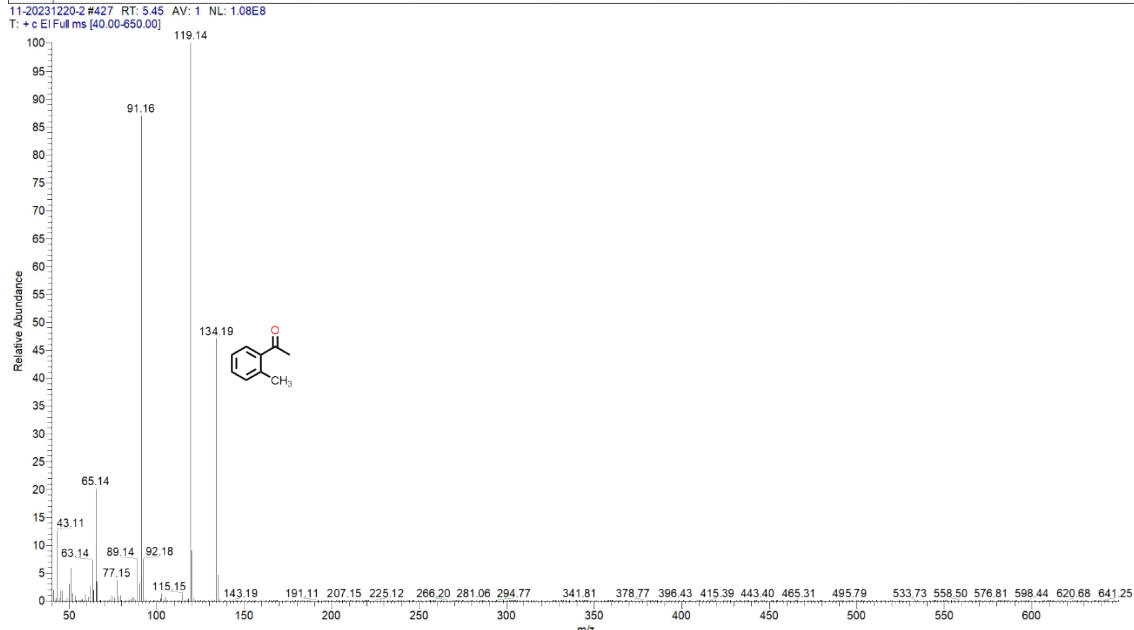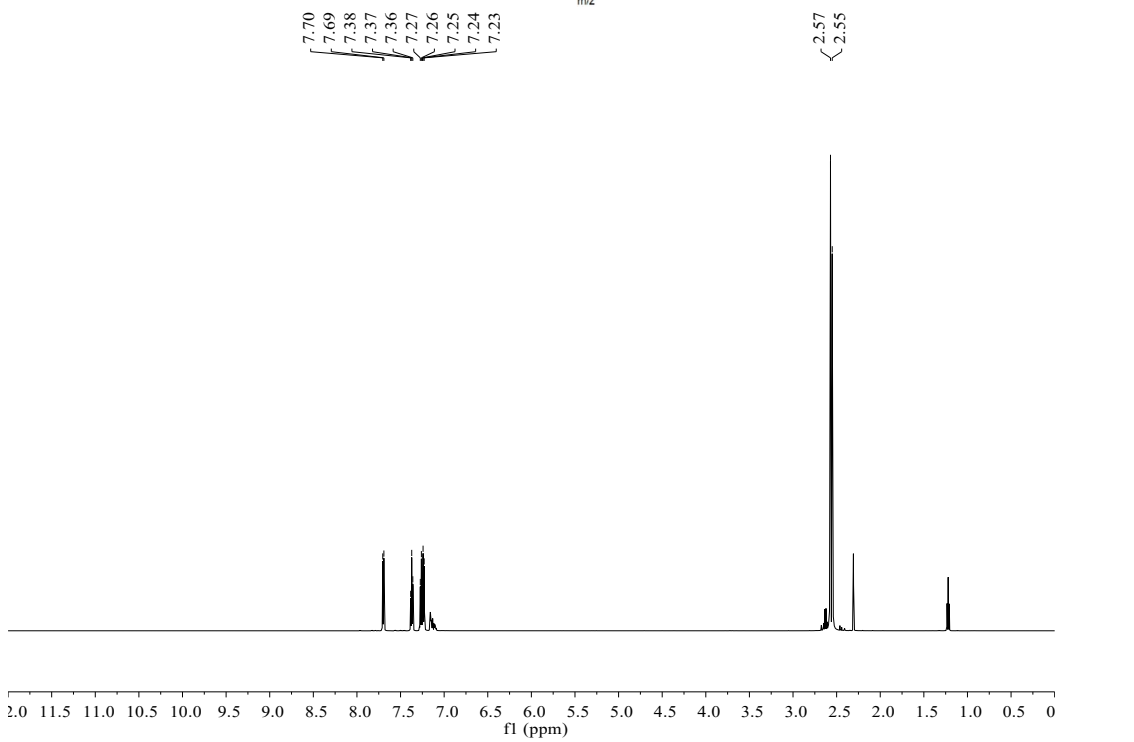

HPLC, GC-MS, and <sup>1</sup>H NMR spectrogram of 2-methylacetophenone

### 3-Methylacetophenone

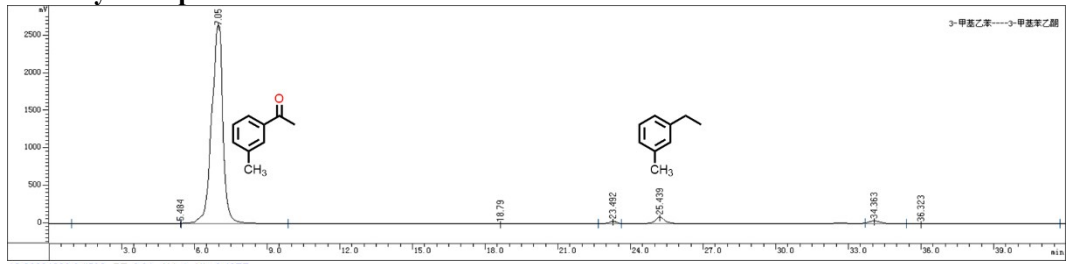

12-20231220-3 #592 RT: 6.01 AV: 1 NL: 3.48E7  
T: + c EI Full ms (40.00-650.00)

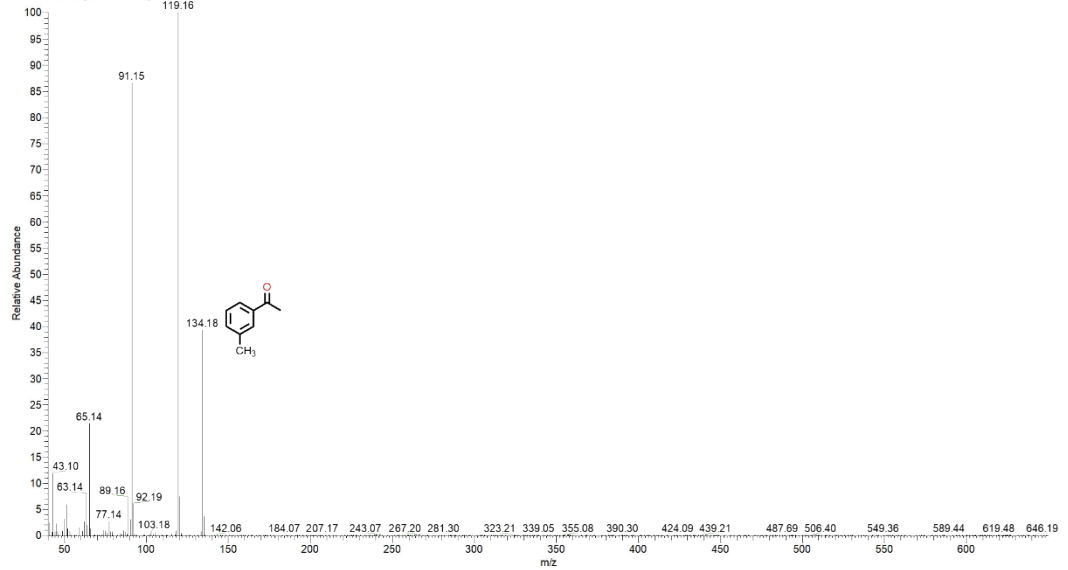

7.74  
7.73  
7.72  
7.34  
7.33  
7.32  
7.31  
7.29

2.55  
2.37

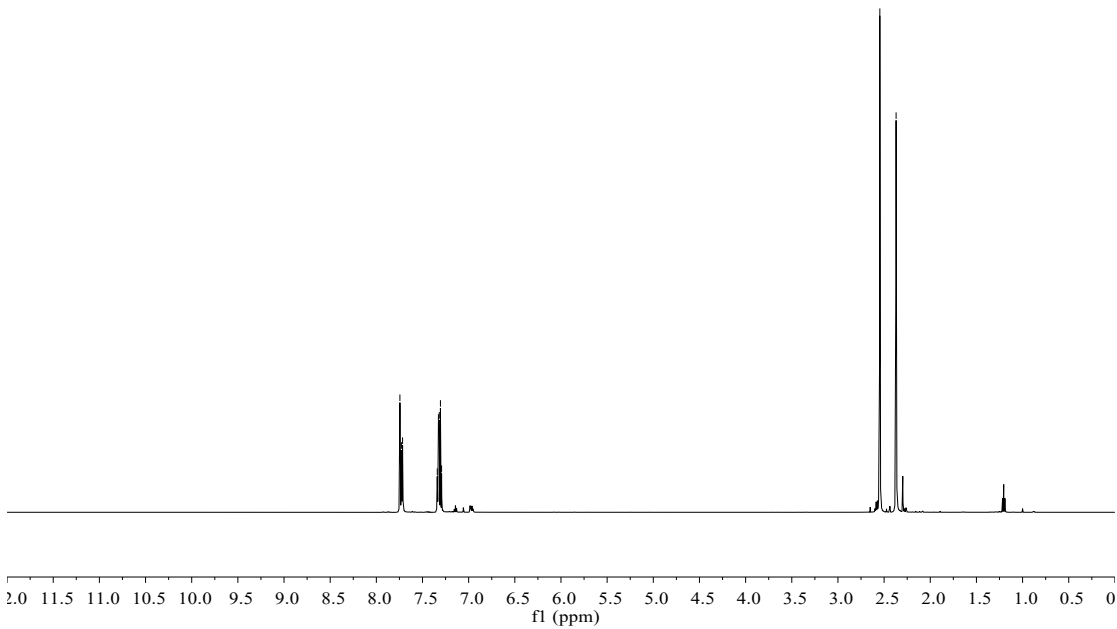

HPLC, GC-MS, and  $^1\text{H}$  NMR spectrogram of 3-methylacetophenone

# 4-Methylacetophenone

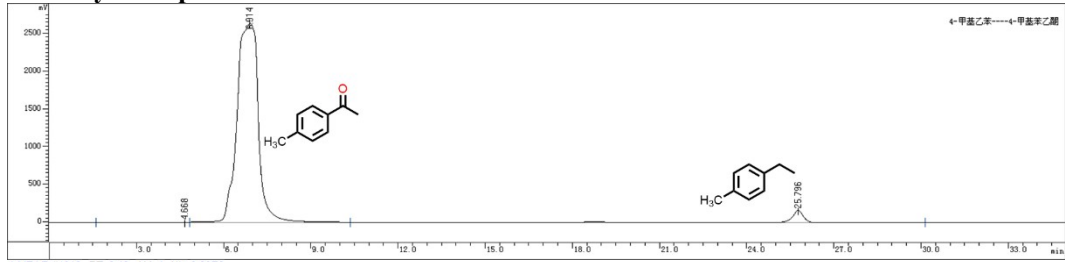

4-ME-YB #1318 RT: 8.48 AV: 1 NL: 3.66E6  
T: +c EI Full ms [40.00-650.00]

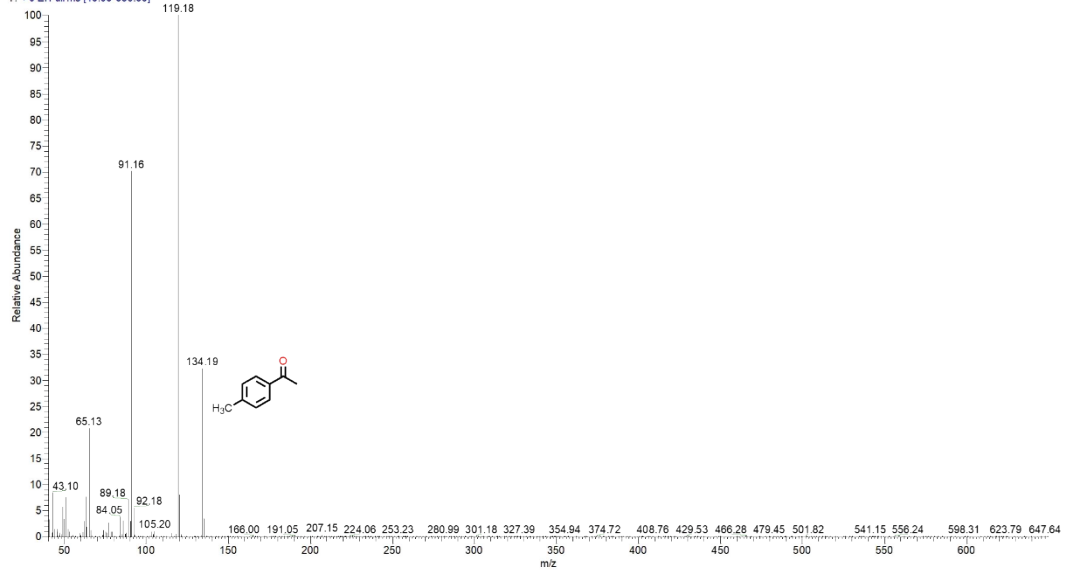

~ 7.72  
~ 7.70

~ 7.10  
~ 7.09

~ 2.41  
~ 2.25

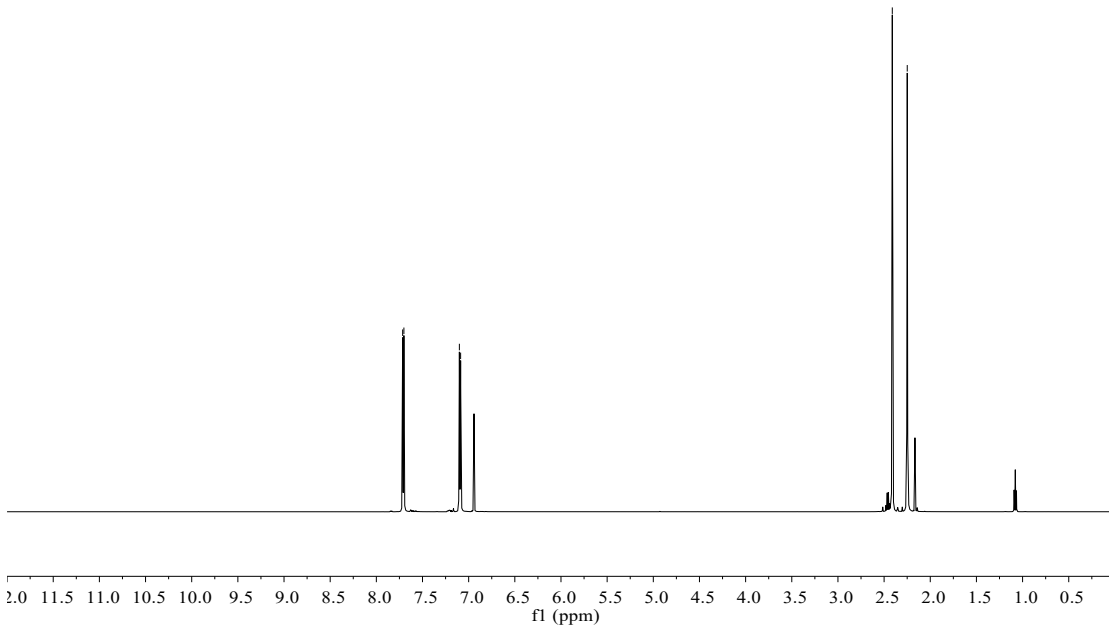

HPLC, GC-MS, and  $^1\text{H}$  NMR spectrogram of 4-methylacetophenone

### 4-Methoxy-acetophenone

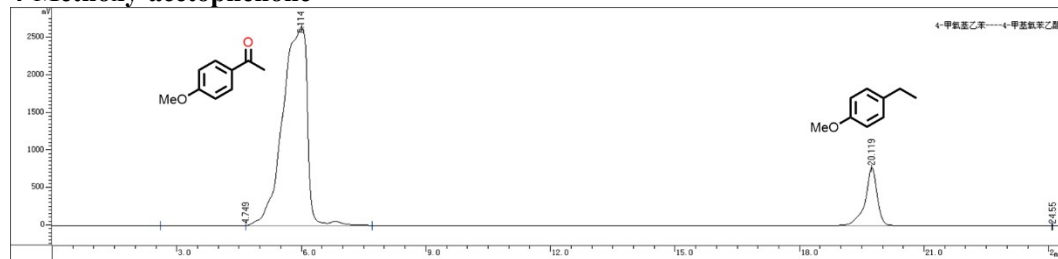

4-OMe-YB #1892 RT: 10.43 AV: 1 NL: 5.45E5  
T: + c EI Full ms [40.00-650.00]

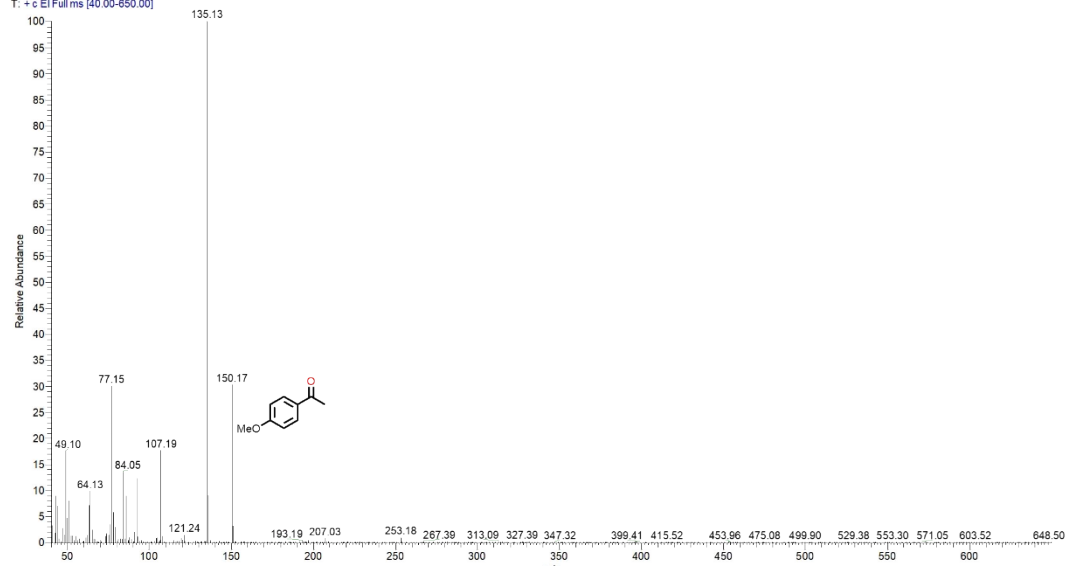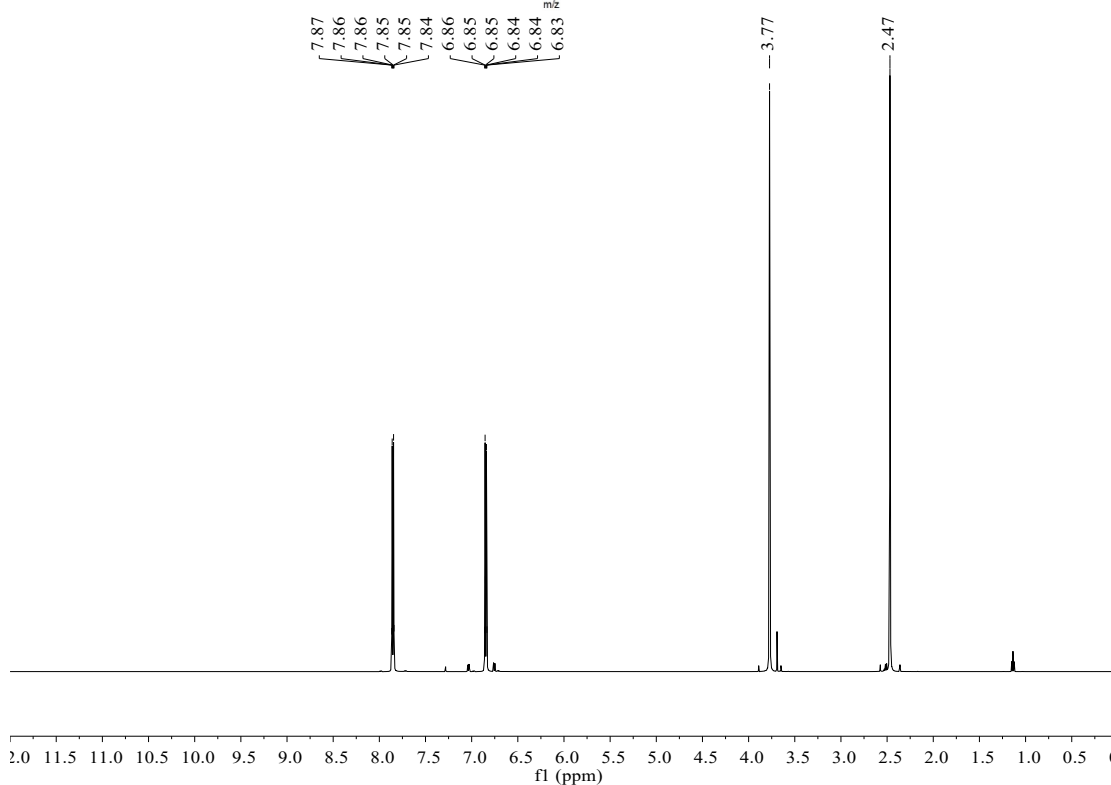

HPLC, GC-MS, and  $^1\text{H}$  NMR spectrogram of 4-methoxy-acetophenone

# 4-Hydroxyacetophenone

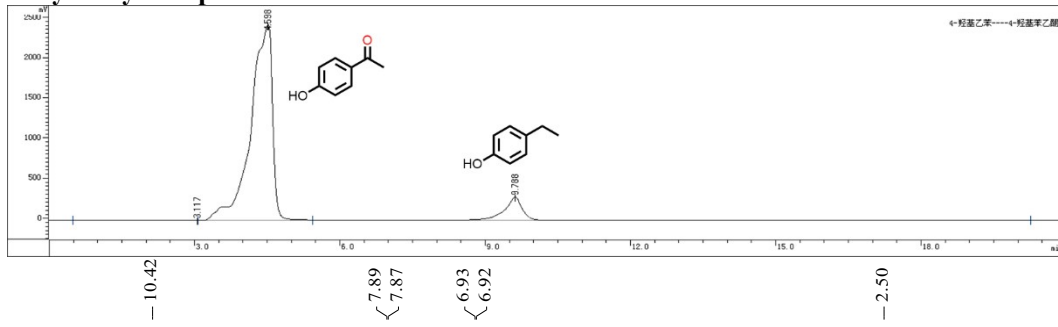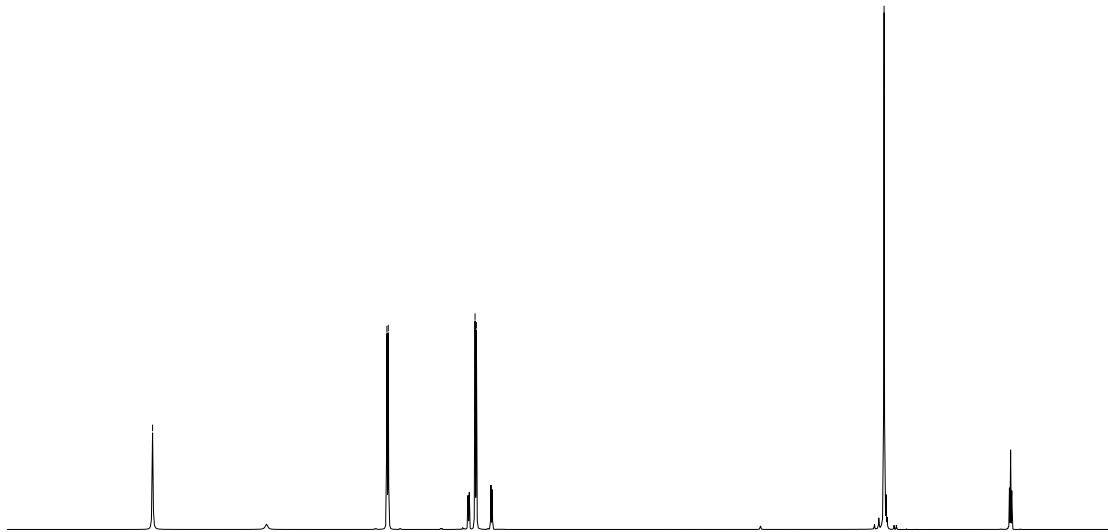

13-20231220-6 #1661 RT: 9.65 AV: 1 NL: 1.03E8  
T: +c EI Full ms (40.00-650.00)

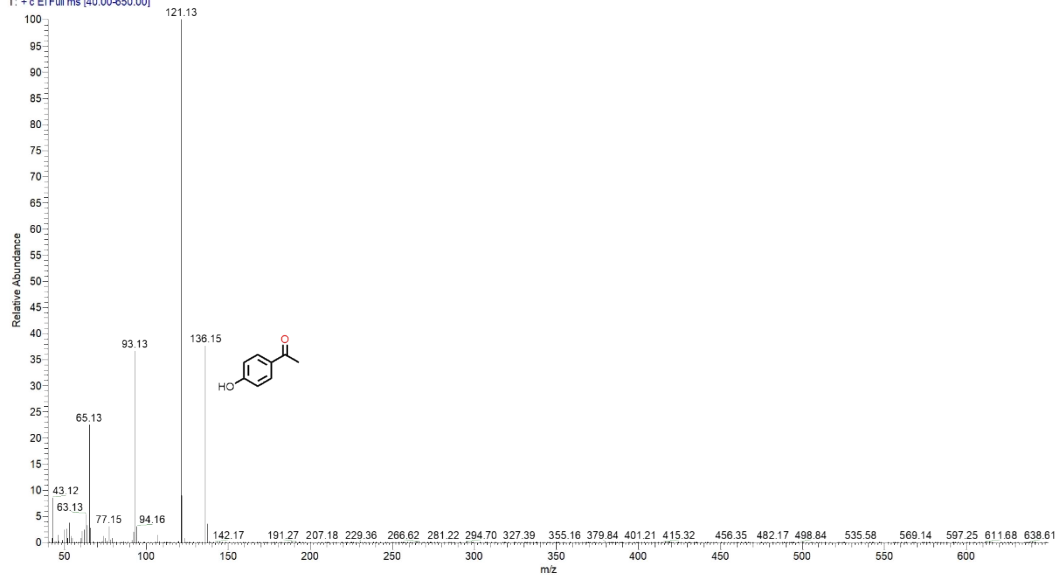

HPLC, GC-MS, and <sup>1</sup>H NMR spectrogram of 4-hydroxyacetophenone

## 2-Hydroxyacetophenone

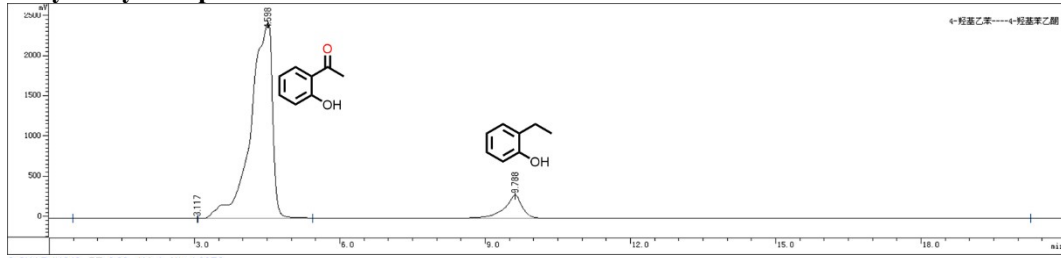

2-CH-19 #1242 RT: 8.22 AV: 1 NL: 1.30E6  
T: +c EI Fullms (40.00-650.00)

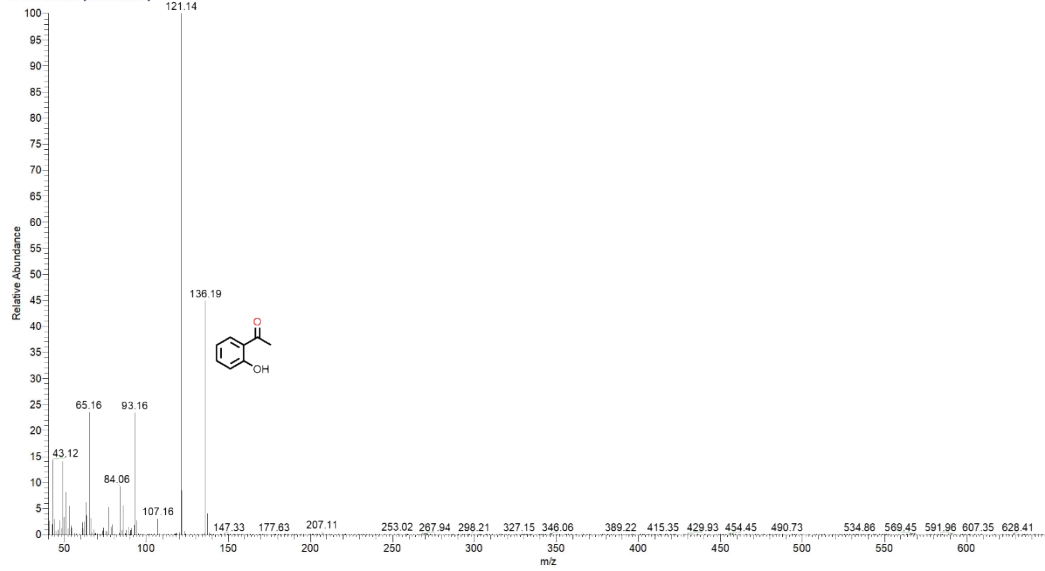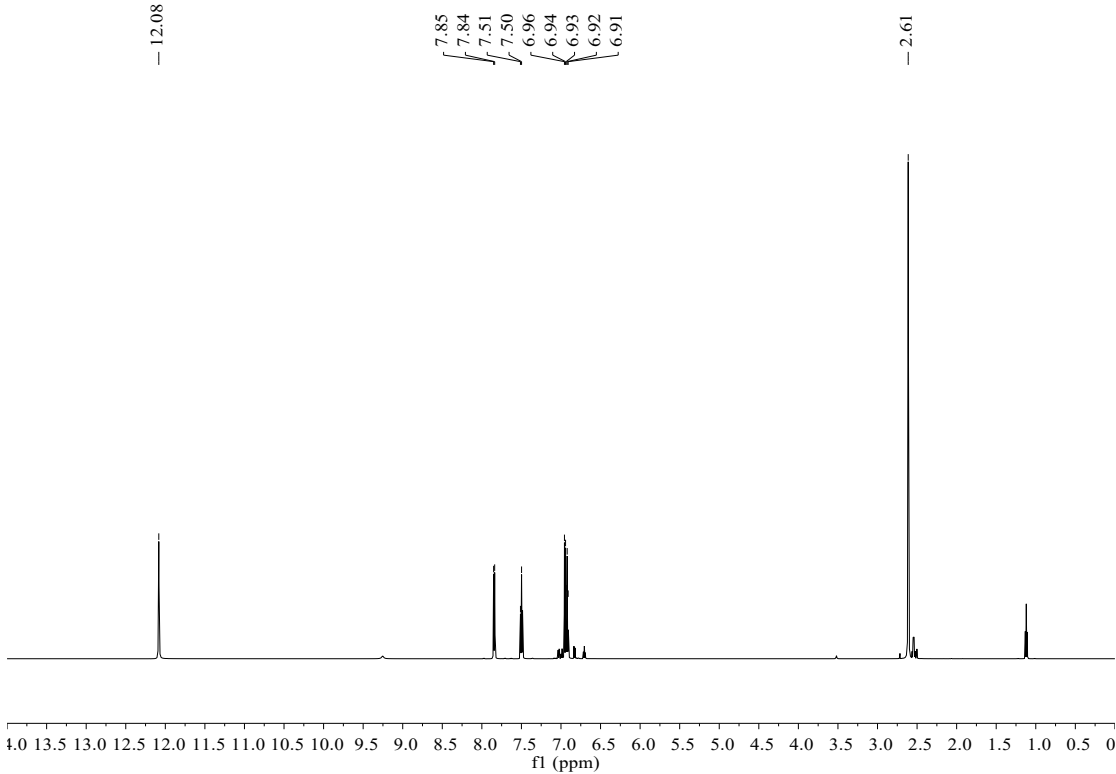

HPLC, GC-MS, and  $^1\text{H}$  NMR spectrogram of 2-hydroxyacetophenone

## 2-Bromoacetophenone

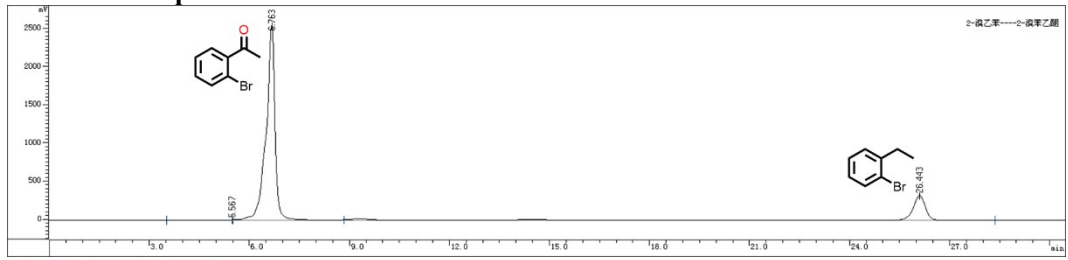

2-Br-YE #1616 RT: 6.49 AV: 1 NL: 4.67E7  
T: +c E: Full ms [40.00-650.00]

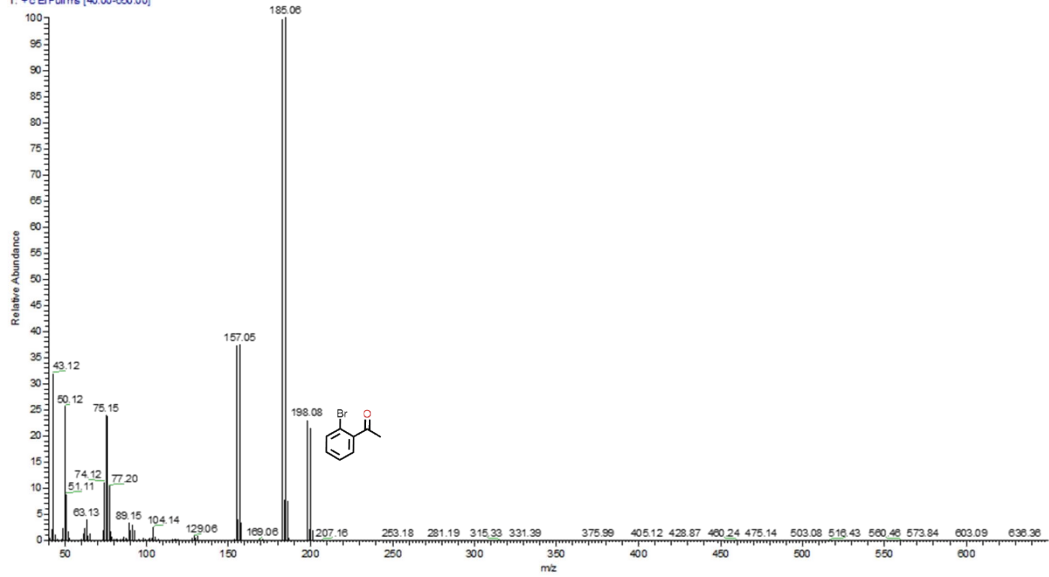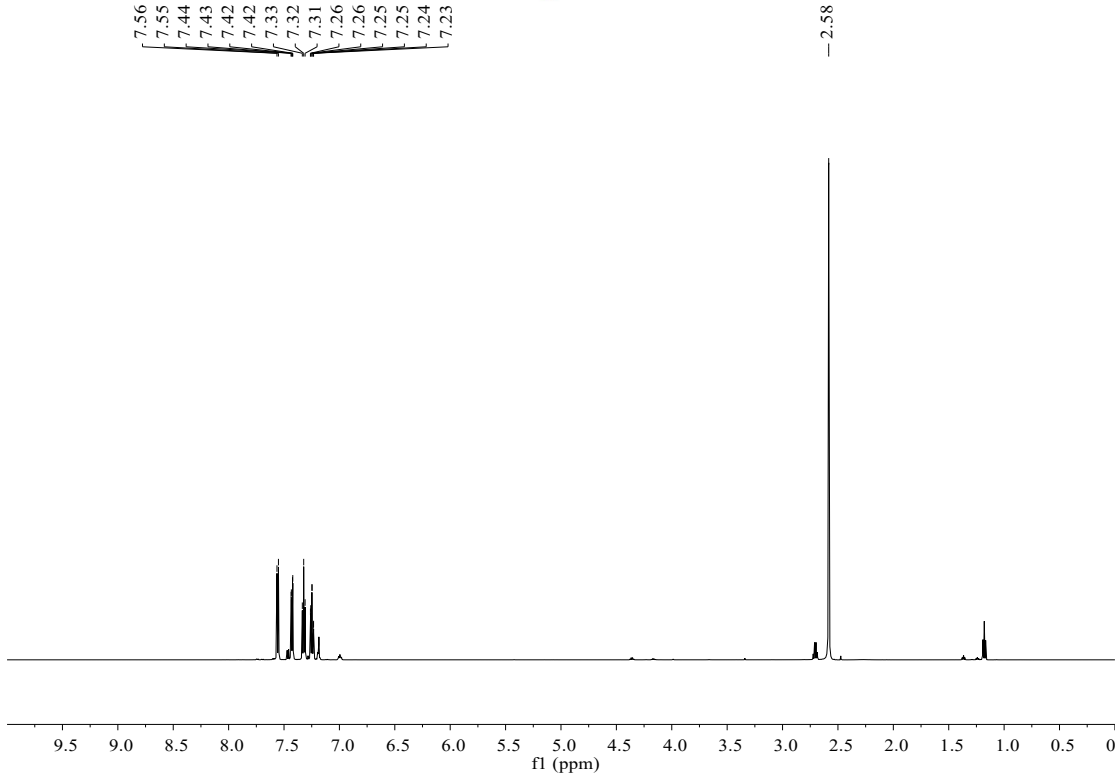

HPLC, GC-MS, and  $^1\text{H}$  NMR spectrogram of 2-bromoacetophenone

# 4-Bromoacetophenone

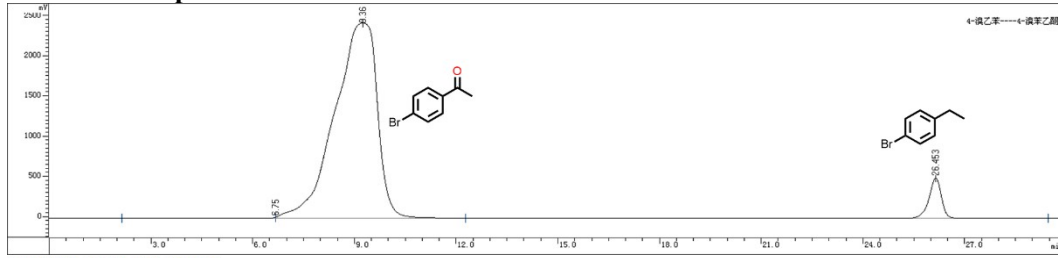

4-Br-YE #1747 RT: 8.94 AV: 1 NL: 8.79E5  
T: +c EI Full ms [40.00-650.00]

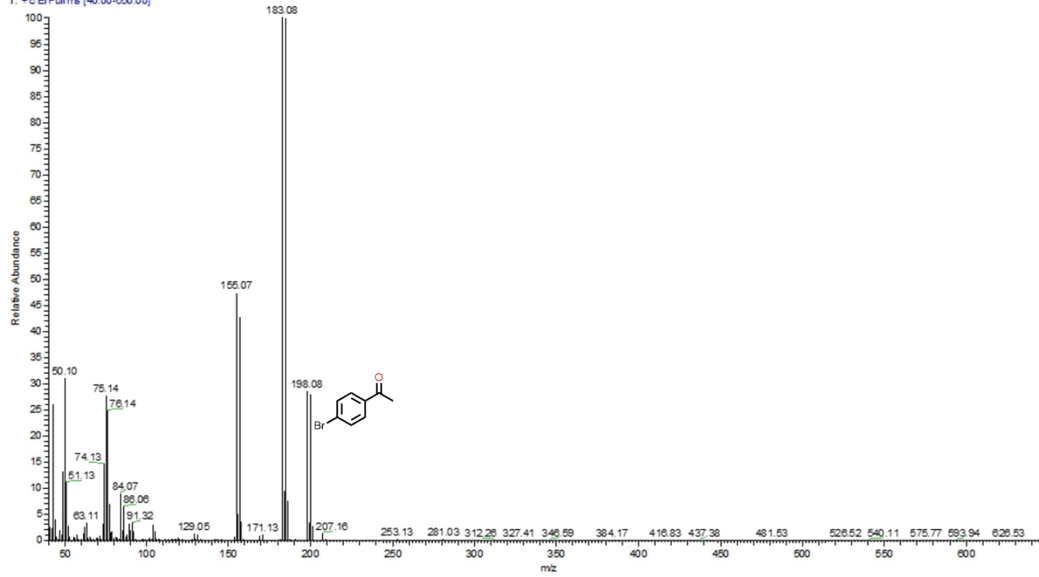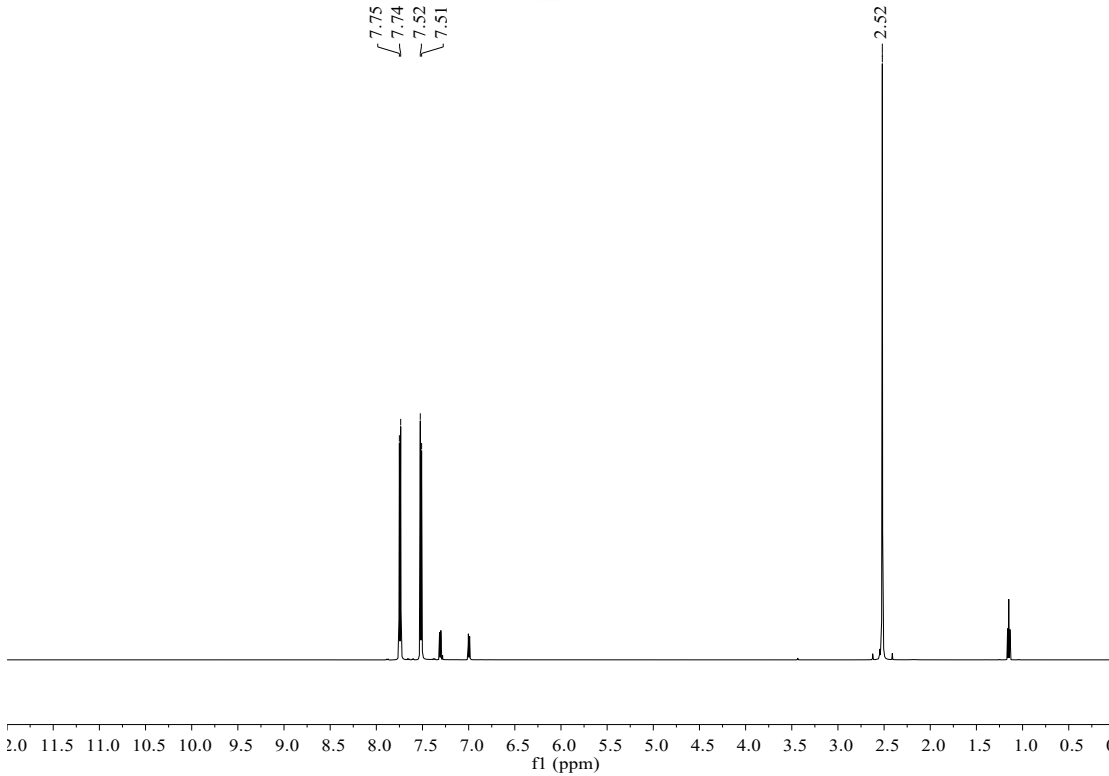

HPLC, GC-MS, and  $^1\text{H}$  NMR spectrogram of 4-bromoacetophenone



# 4-Iodoacetophenone

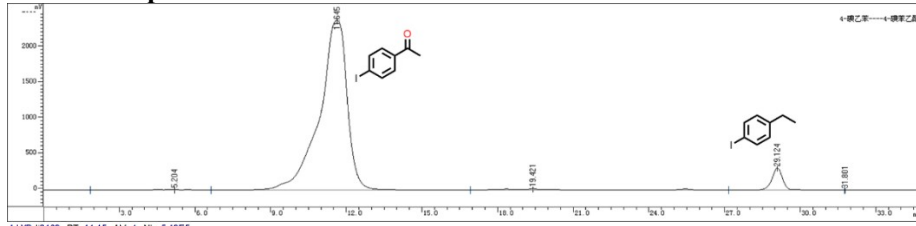

411982102 RT: 11.15 AV: 1 NL: 543E5  
T: + e El Full.ms [40.00-650.00]

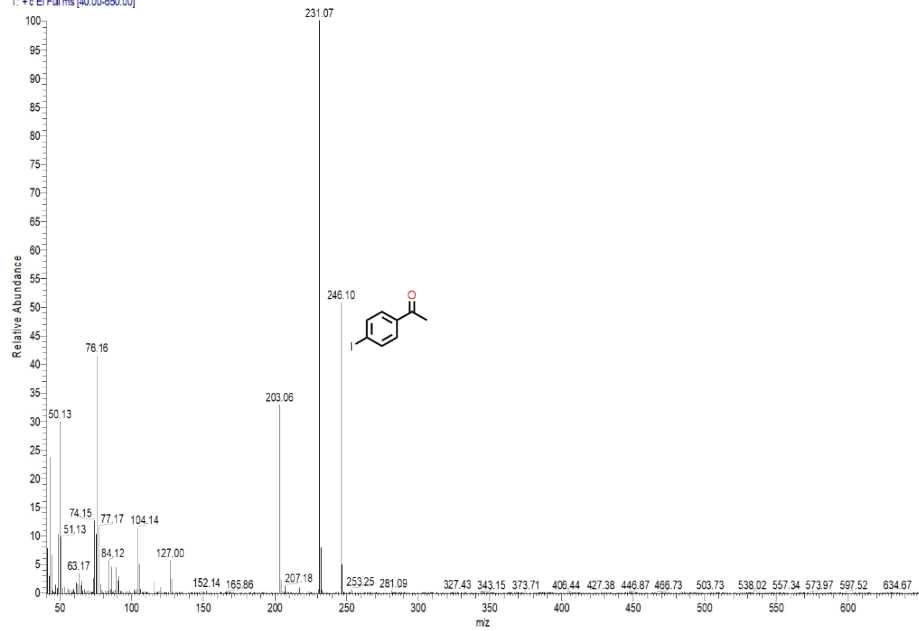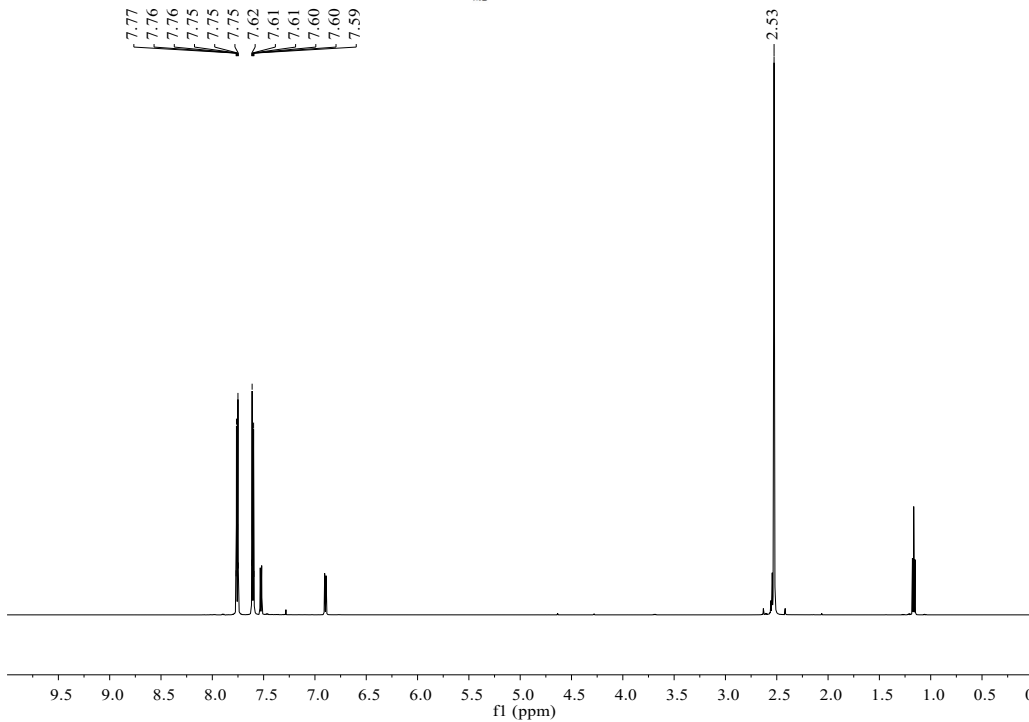

HPLC, GC-MS, and <sup>1</sup>H NMR spectrogram of 4-Iodoacetophenone

# 4-Aminoacetophenone

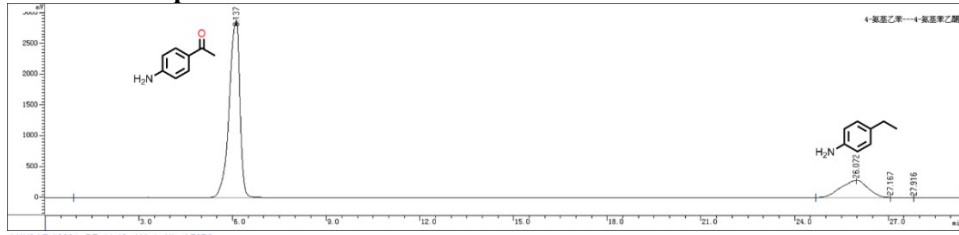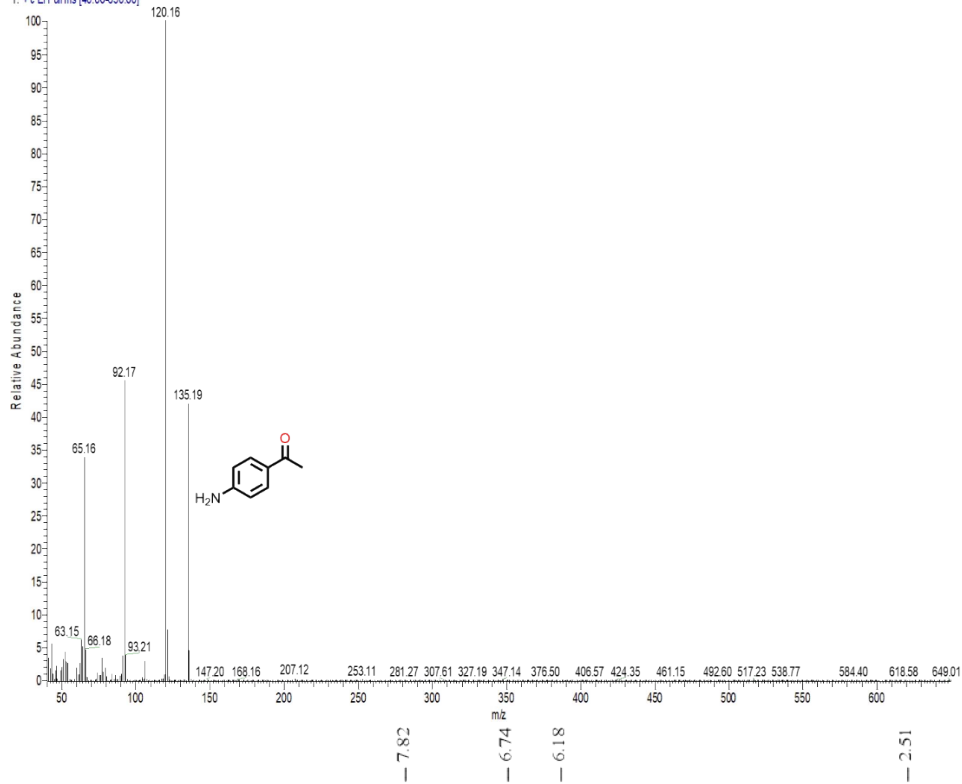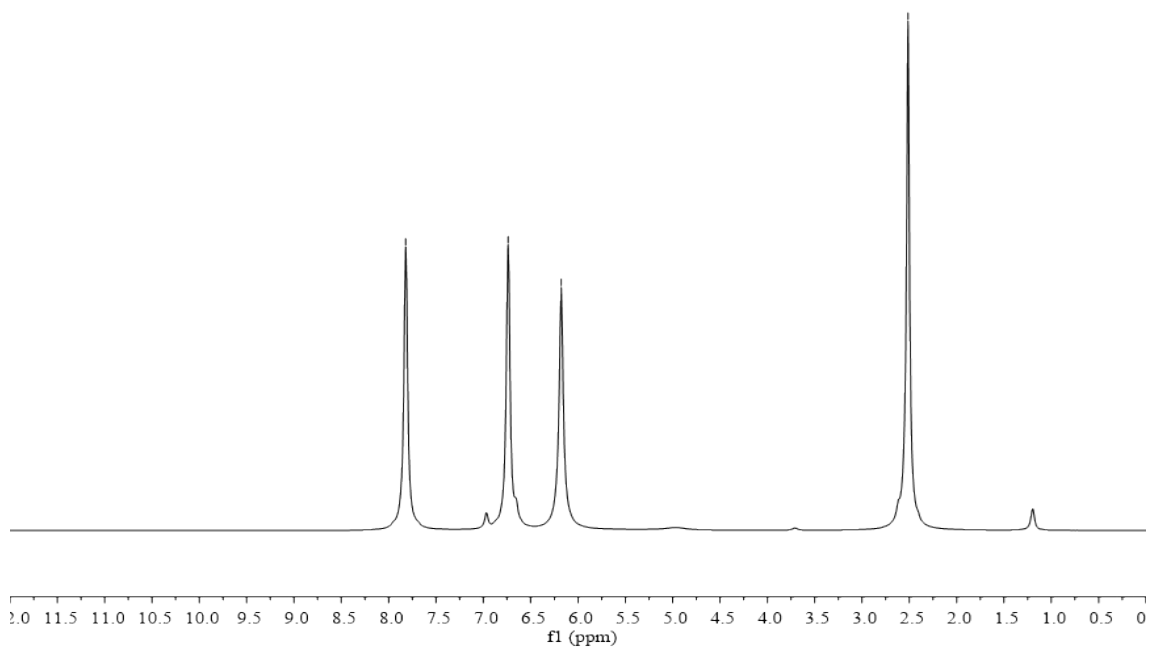

HPLC, GC-MS, and <sup>1</sup>H NMR spectrogram of 4-aminoacetophenone

# 4-Nitroacetophenone

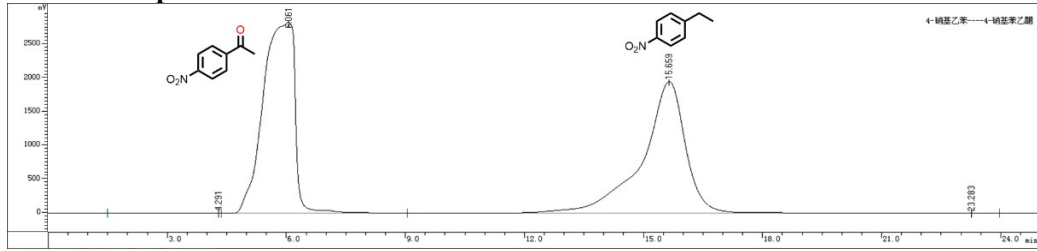

4-NO2.YB #2082 RT: 11.11 AV: 1 NL: 2.17E6  
T: + c EI Full ms [40.00-650.00]

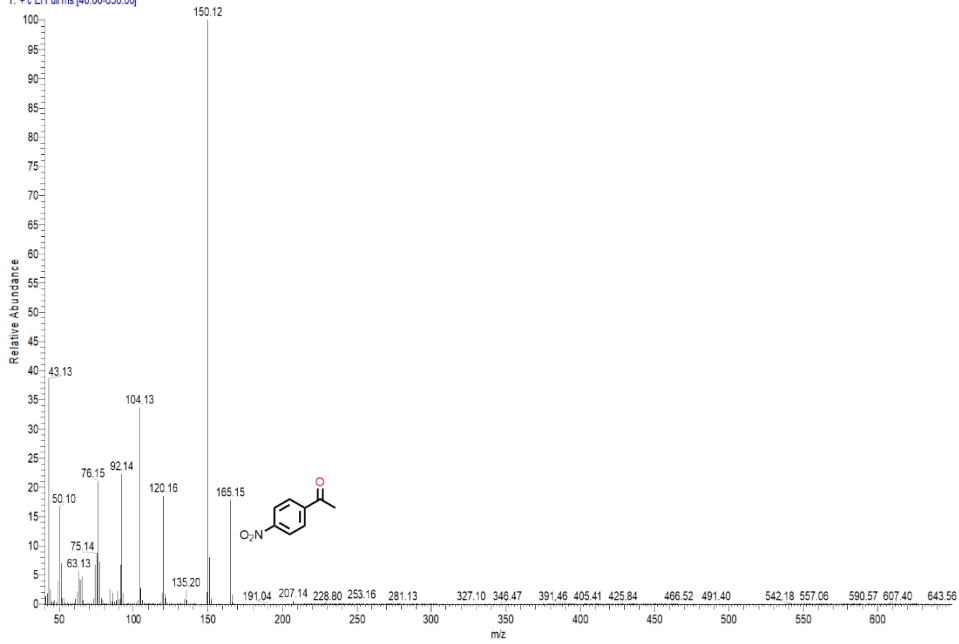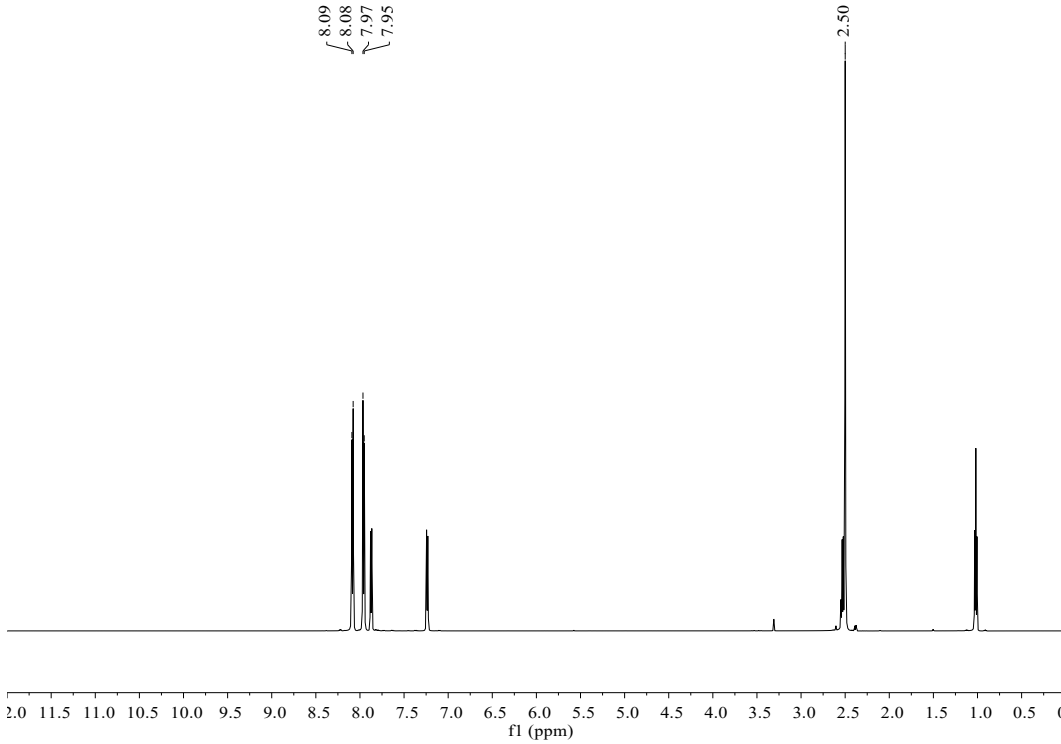

HPLC, GC-MS, and  $^1\text{H}$  NMR spectrogram of 4-nitroacetophenone

# Benzophenone

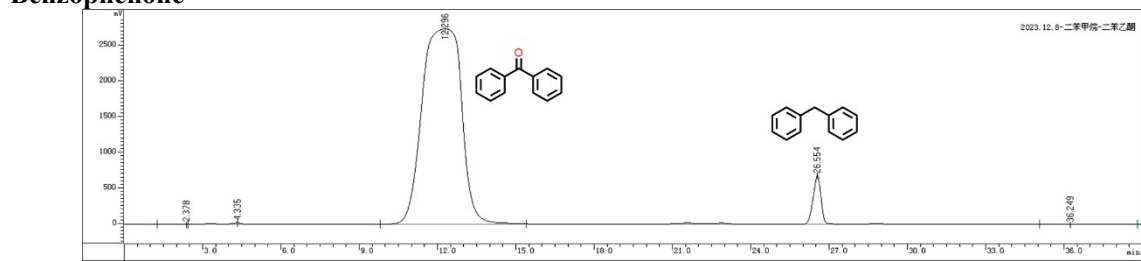

15-20231220-13#2348 RT: 11.98 AV: 1 NL: 2.61E8  
T: + e EI Full ms (40.00-650.00)

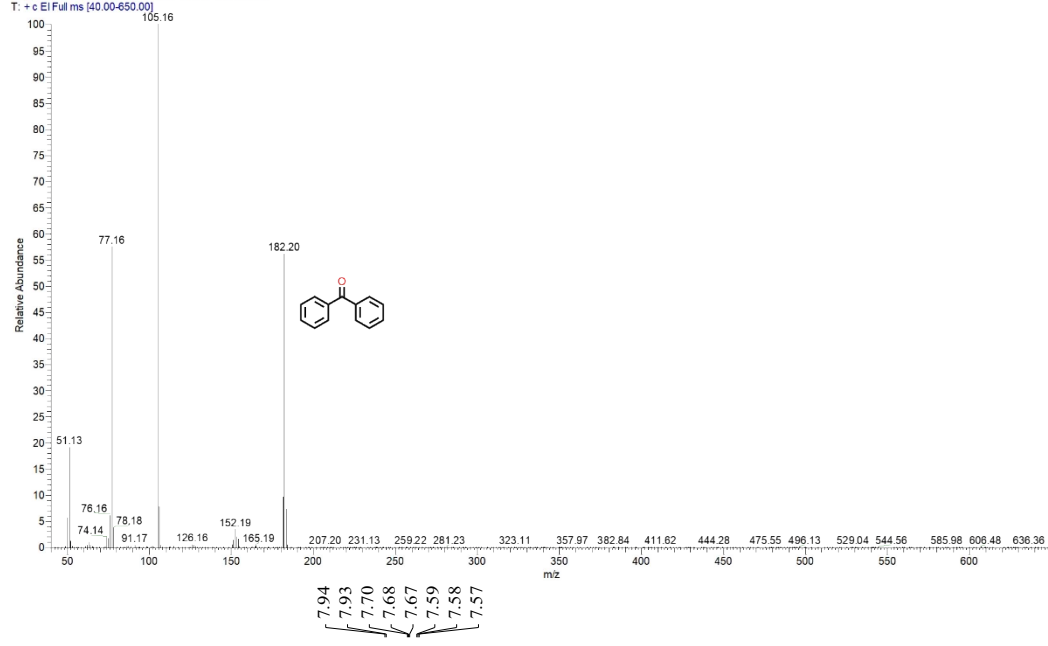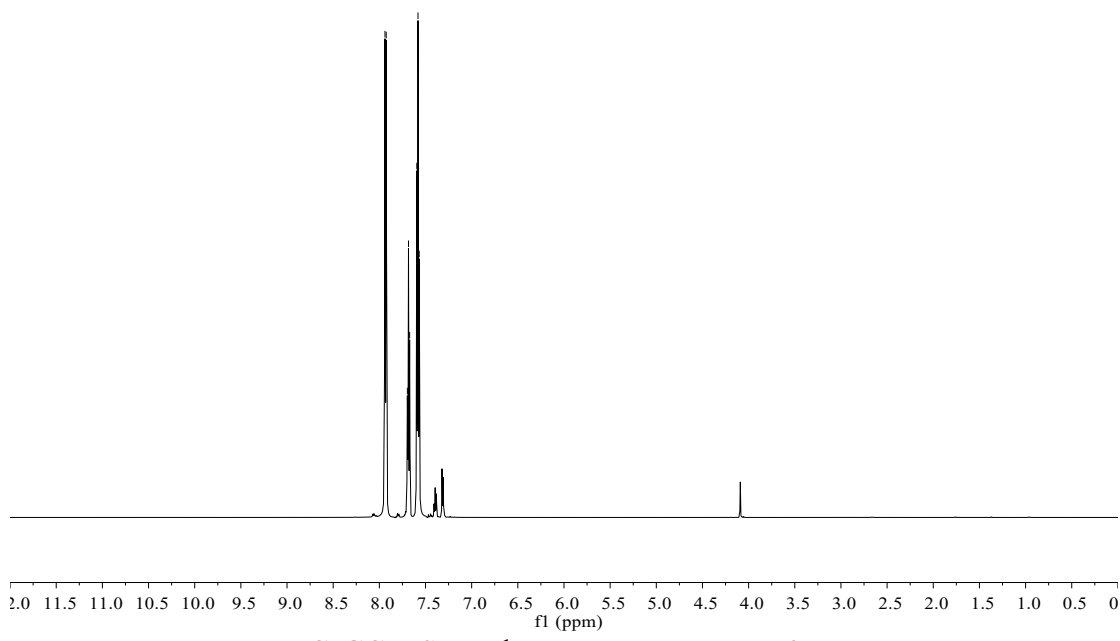

HPLC, GC-MS, and  $^1\text{H}$  NMR spectrogram of benzophenone

# 4, 4-Dihydroxybenzophenone

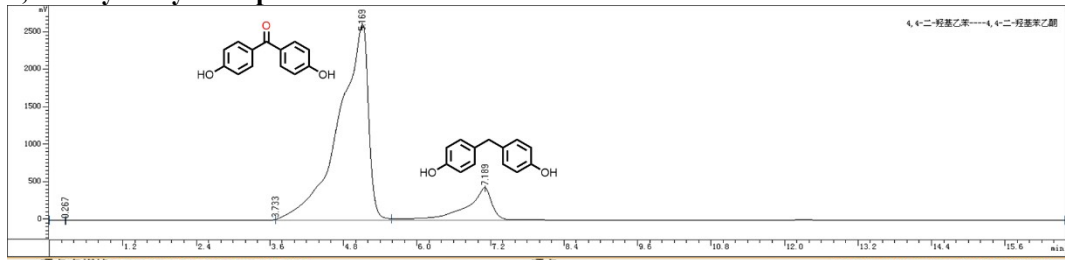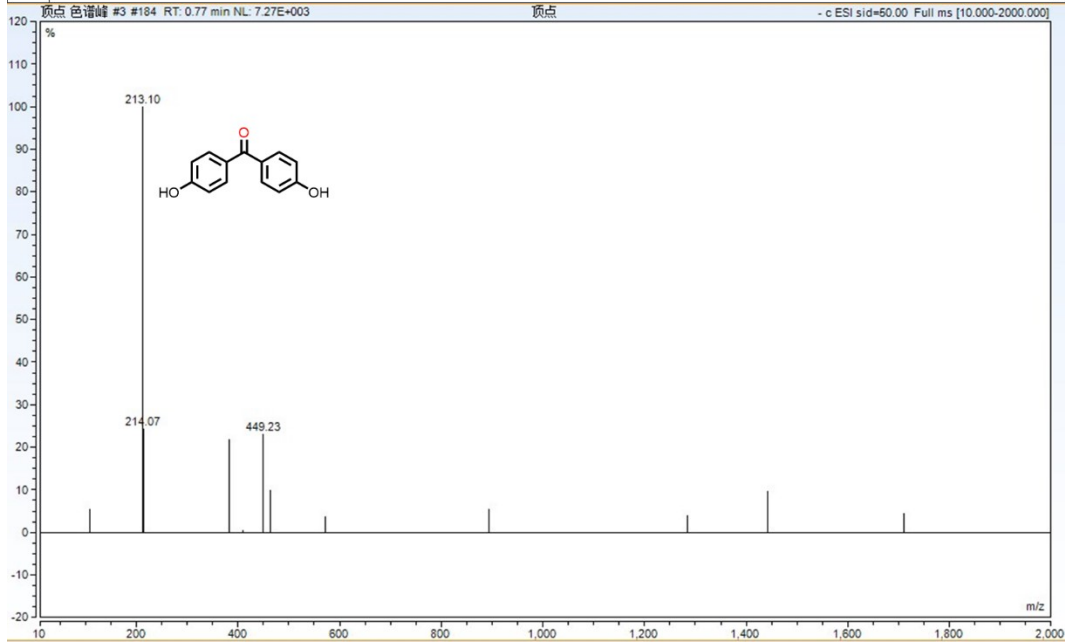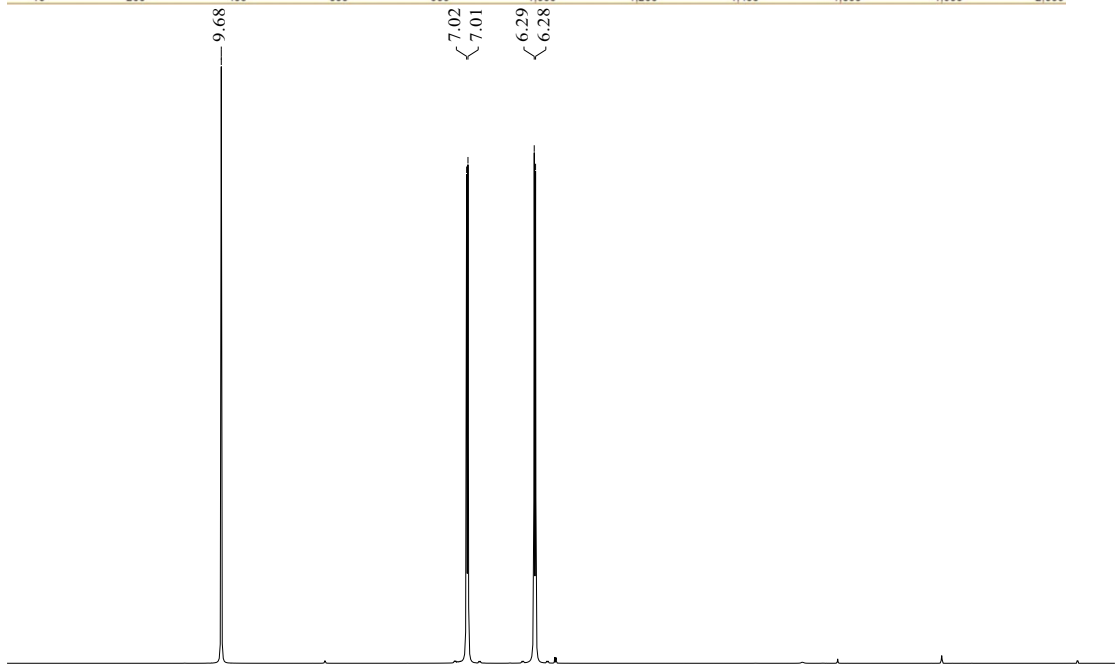

2.0 11.5 11.0 10.5 10.0 9.5 9.0 8.5 8.0 7.5 7.0 6.5 6.0 5.5 5.0 4.5 4.0 3.5 3.0 2.5 2.0 1.5 1.0 0.5 0  
f1 (ppm)

HPLC, HPLC-MS, and  $^1\text{H}$  NMR spectrogram of 4, 4-dihydroxybenzophenone

# 4, 4-Diaminobenzophenone

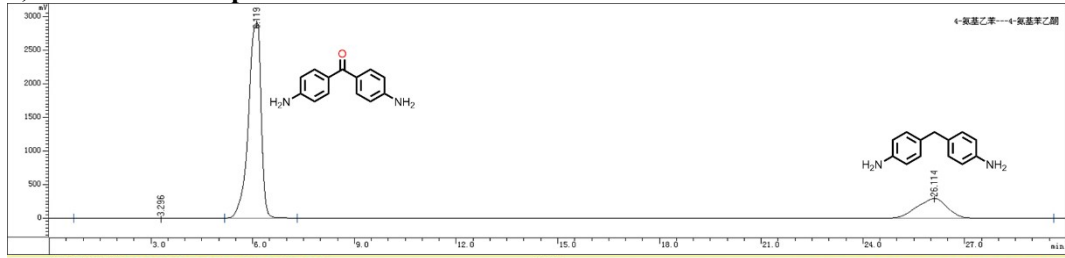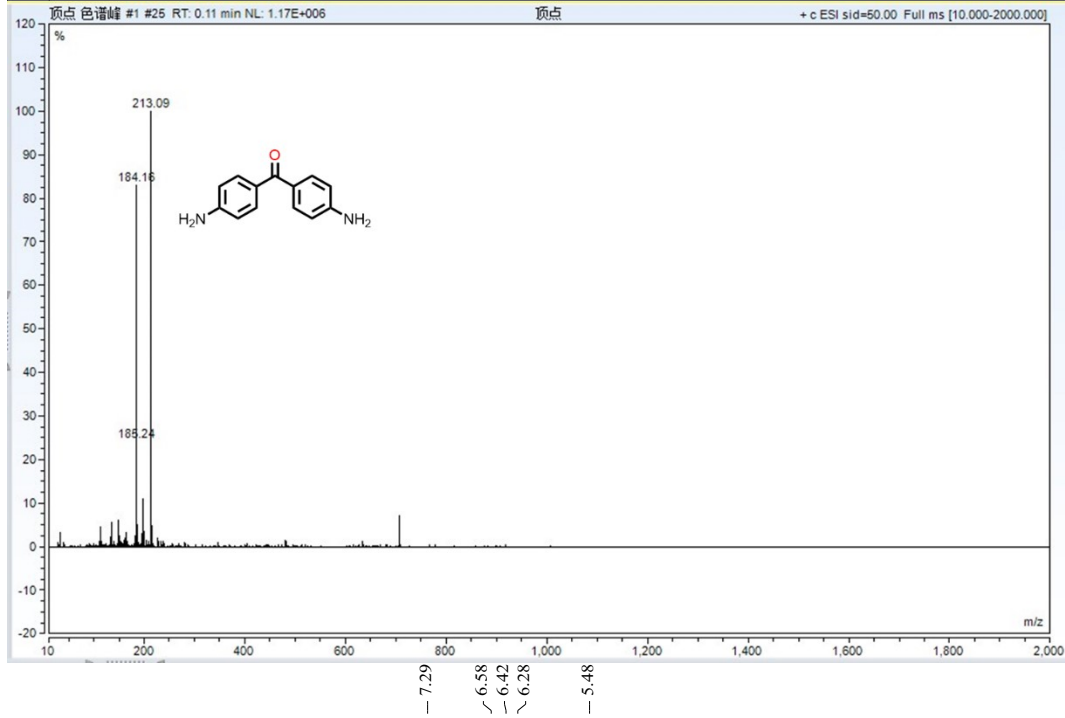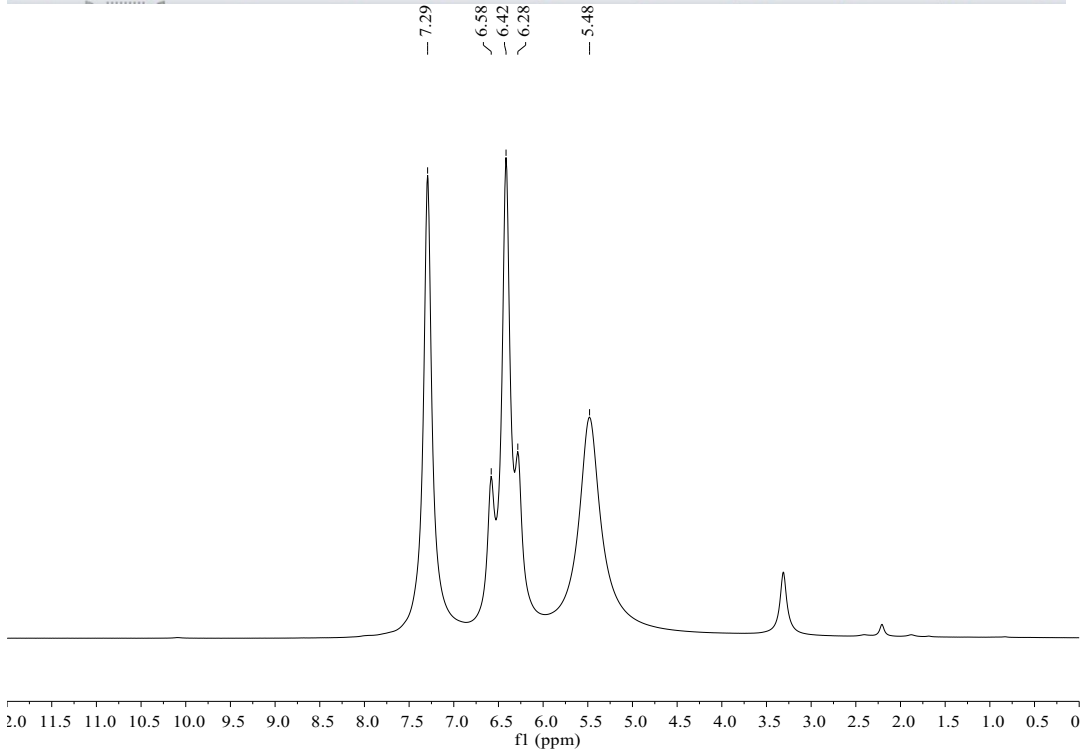

HPLC, HPLC-MS, and  $^1\text{H}$  NMR spectrogram of 4, 4-diaminobenzophenone

# Xanthone

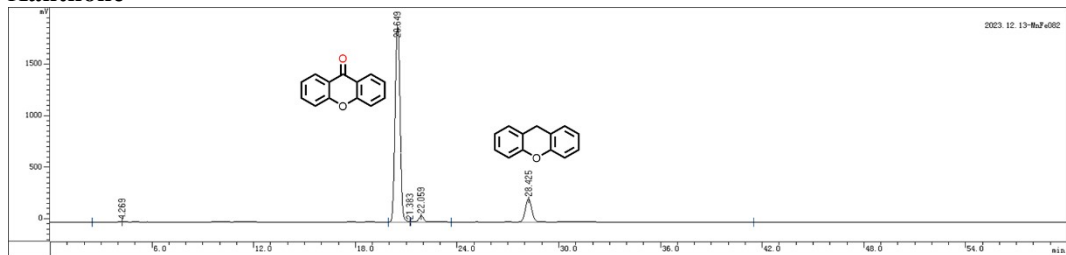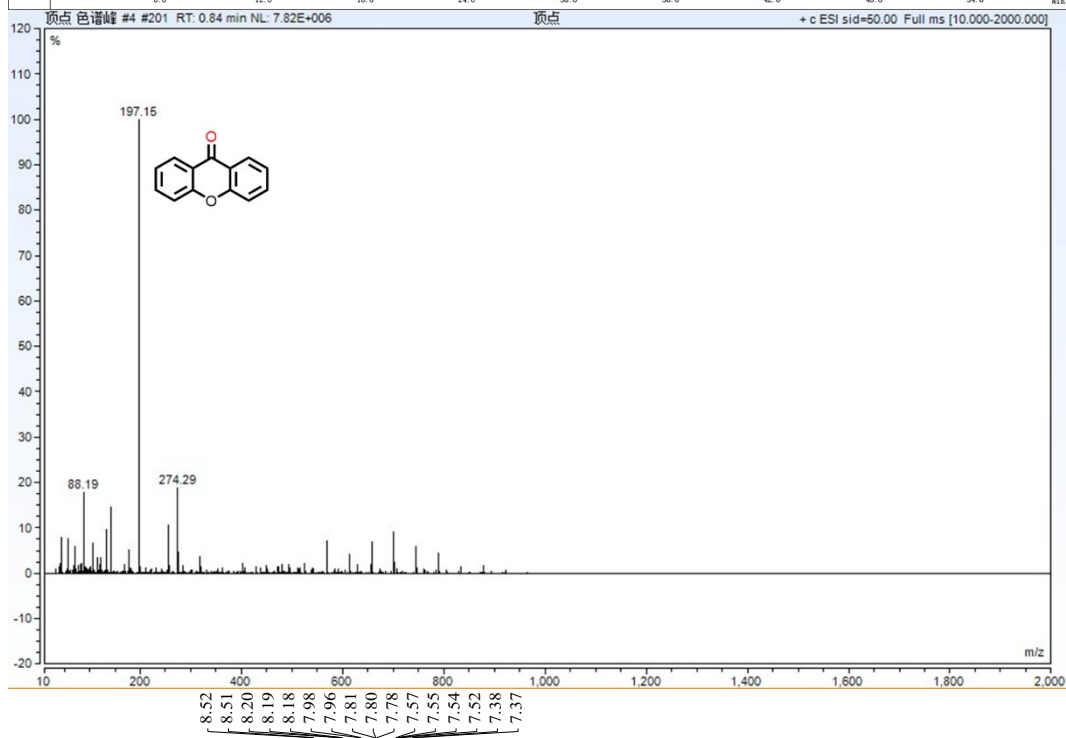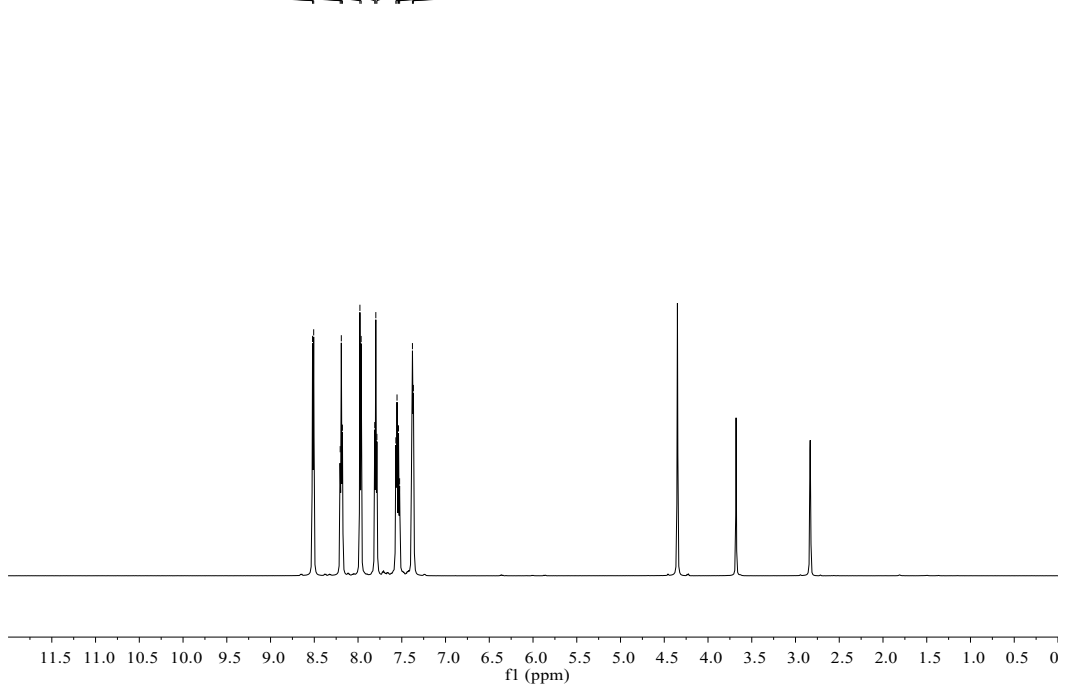

HPLC, HPLC-MS, and  $^1\text{H}$  NMR spectrogram of xanthone

# 9-Thioxanthone

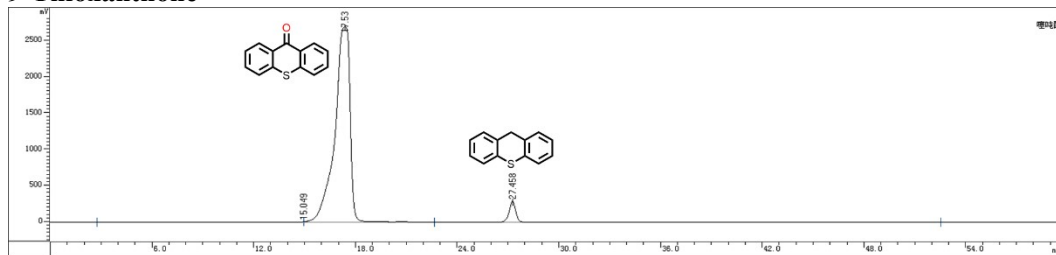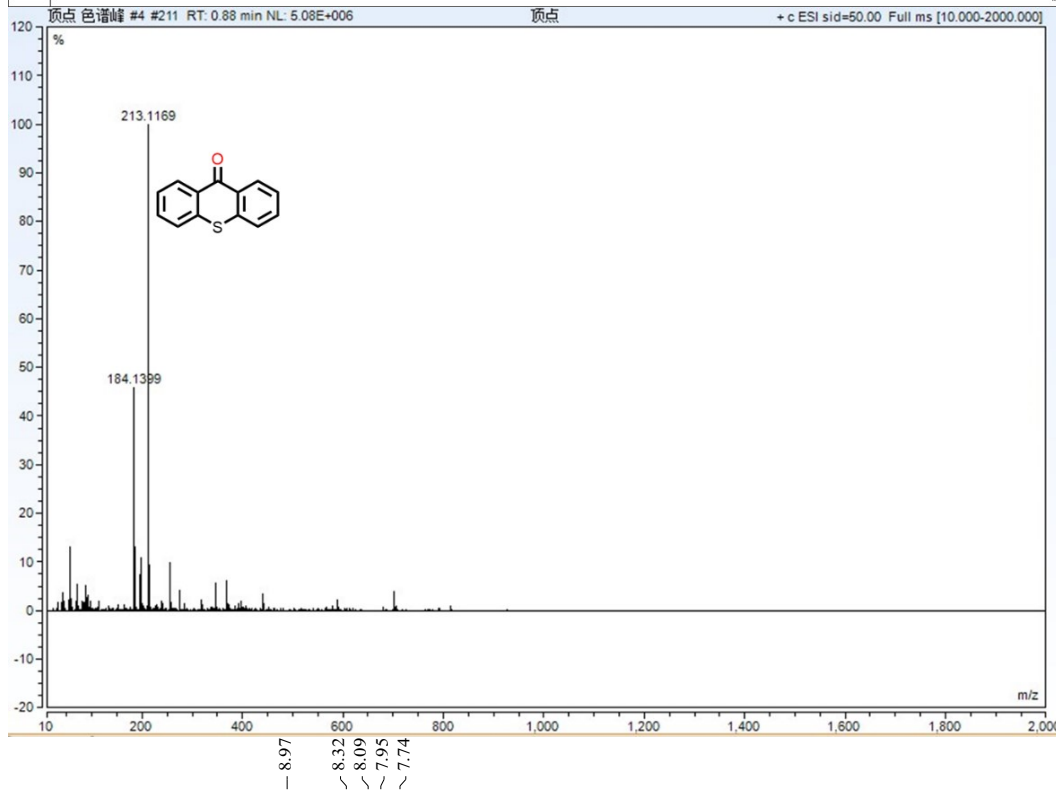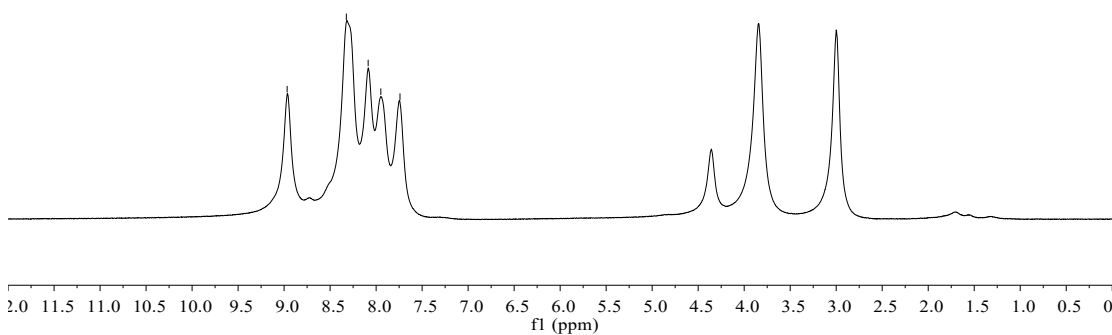

HPLC, HPLC-MS, and <sup>1</sup>H NMR spectrogram of 9-thioxanthone



# Benzaldehyde

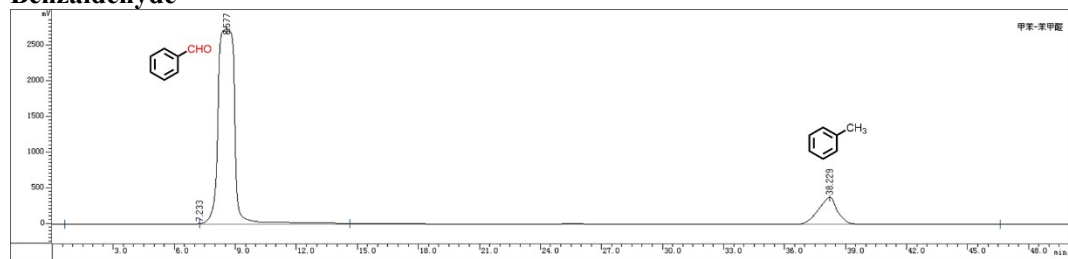

18-2 #473 RT: 5.11 AV: 1 NL: 3.48E7  
T: + e EI Full ms (40.00-650.00)

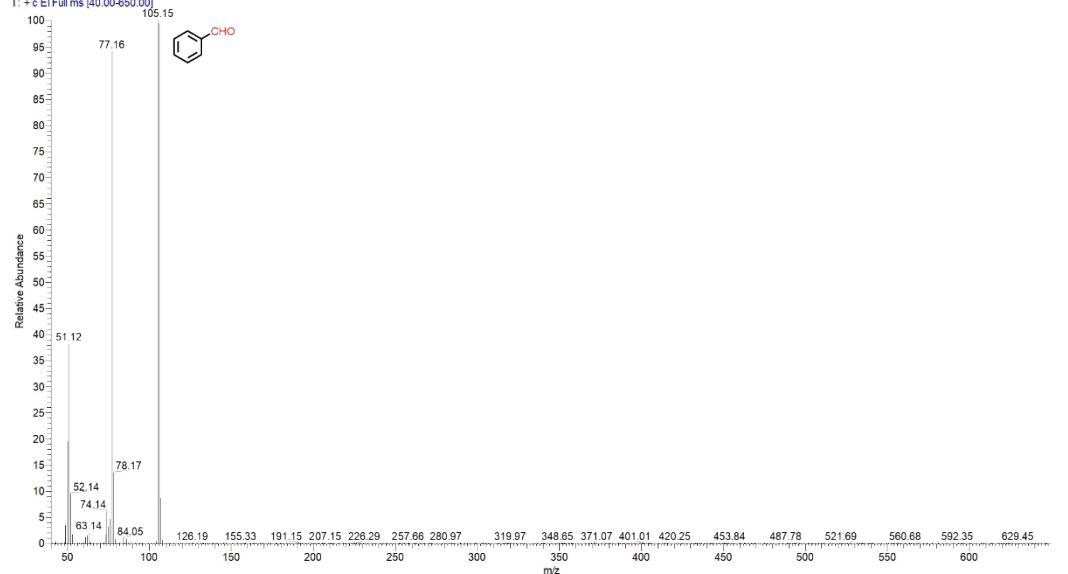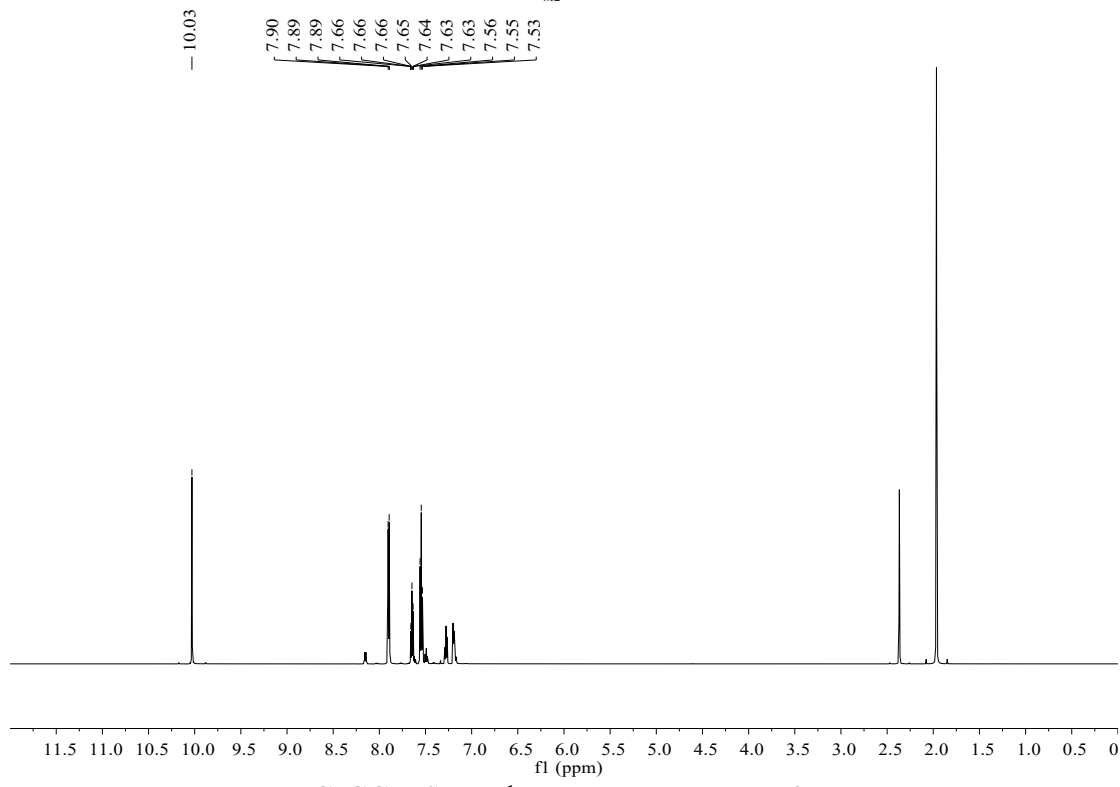

HPLC, GC-MS, and <sup>1</sup>H NMR spectrogram of benzaldehyde

# Cyclohexanone

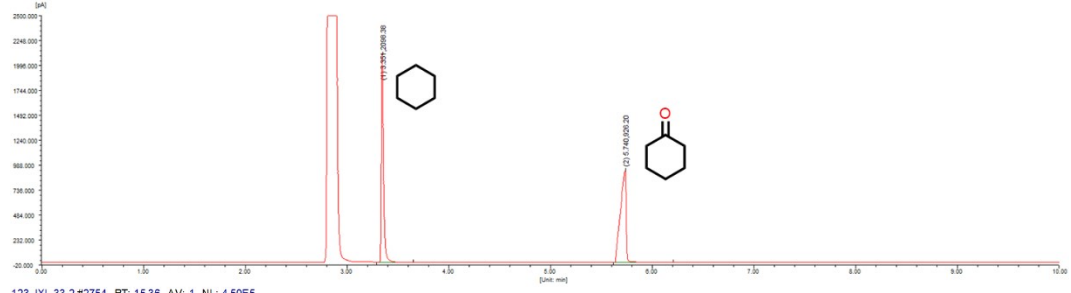

123-JXL-33-2 #2754 RT: 15.36 AV: 1 NL: 4.50E5  
T: +c EI Full ms [40.00-650.00]

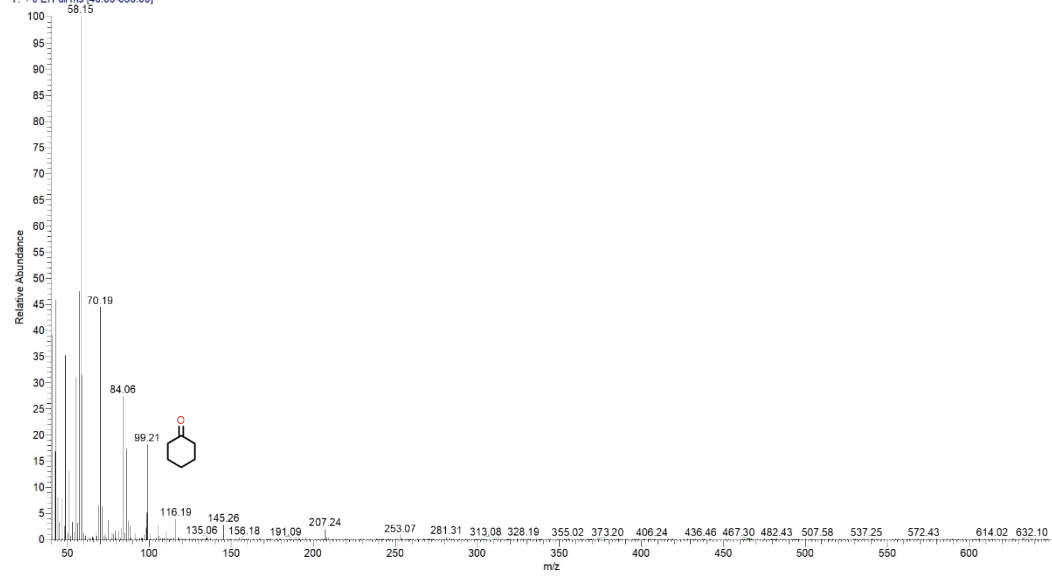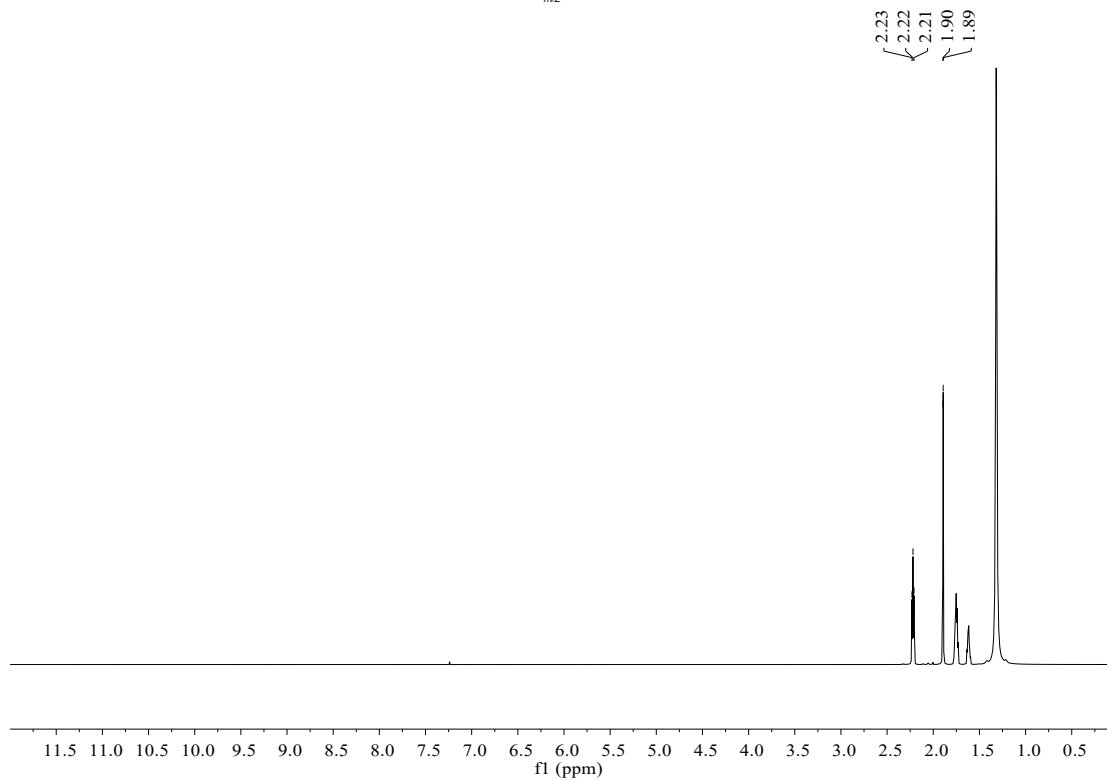

GC, GC-MS, and  $^1\text{H}$  NMR spectrogram of cyclohexanone

# Phenol

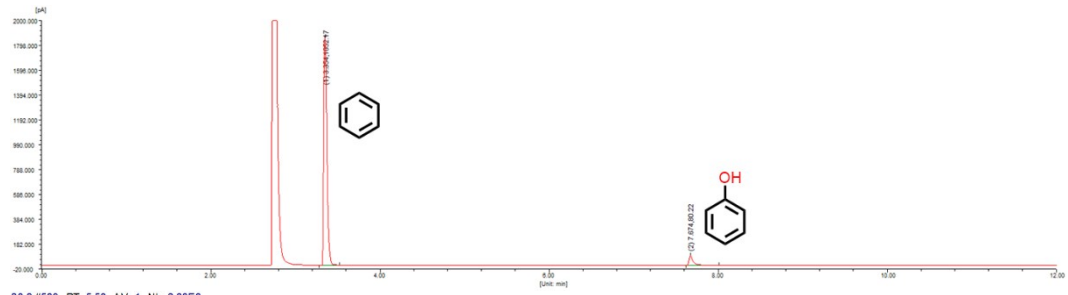

20-2 #589 RT: 5.50 AV: 1 NL: 2.68E8  
T: -c EI Full ms (40.00-650.00)

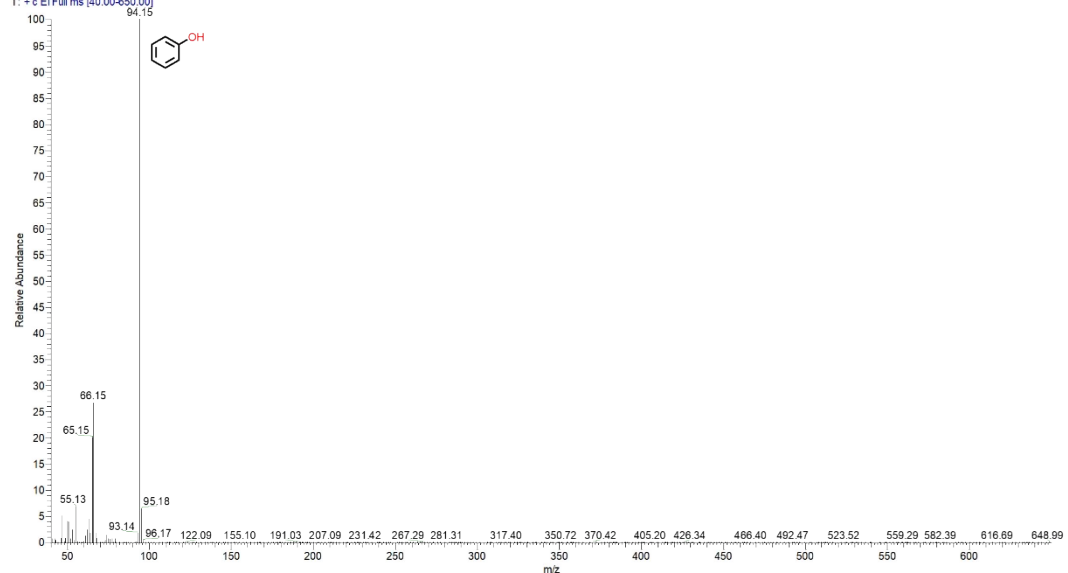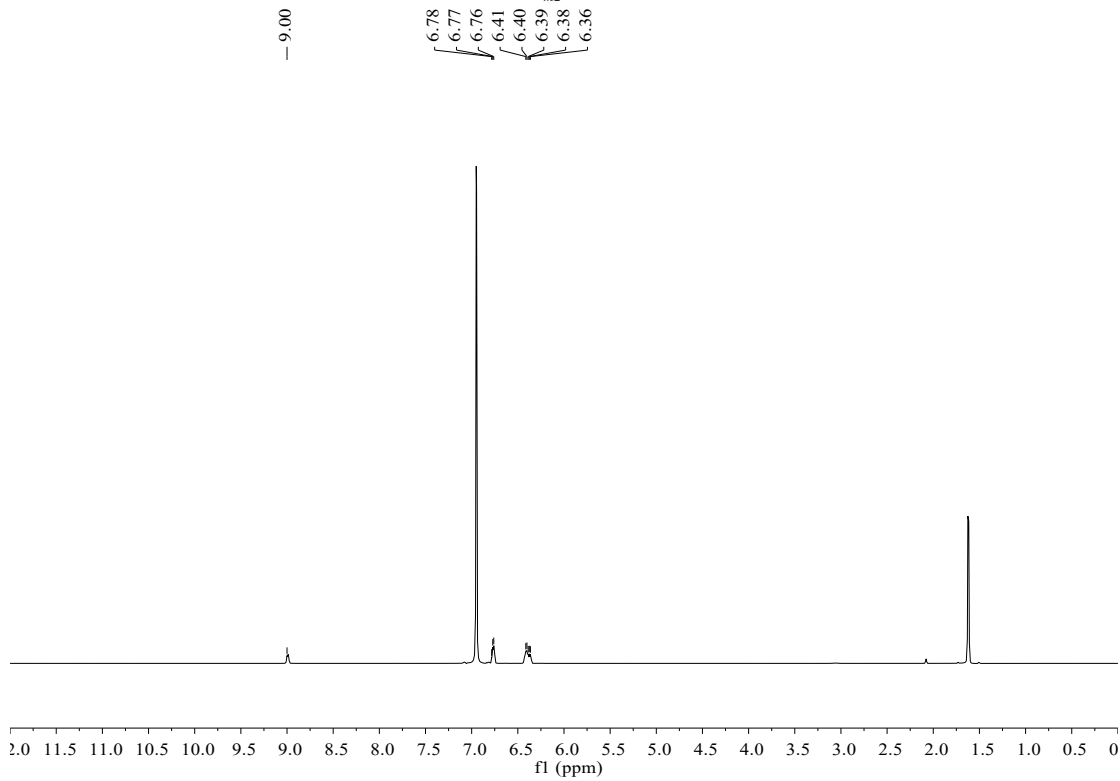

GC, GC-MS, and <sup>1</sup>H NMR spectrogram of phenol

# Benzaldehyde

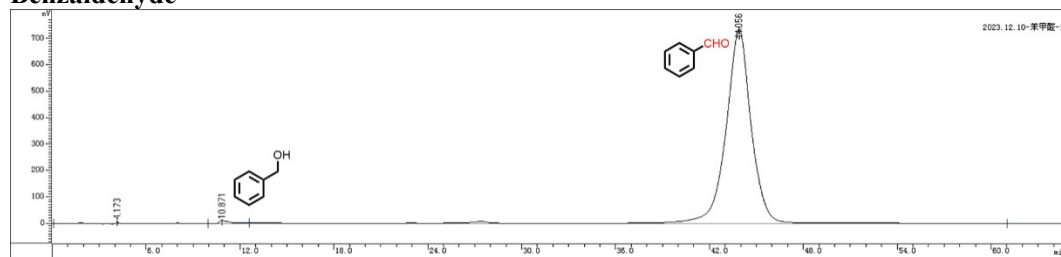

benjachur#367 RT: 5.25 AV: 1 NL: 4.48E5

T: -c EI Full ms [40.00-650.00]

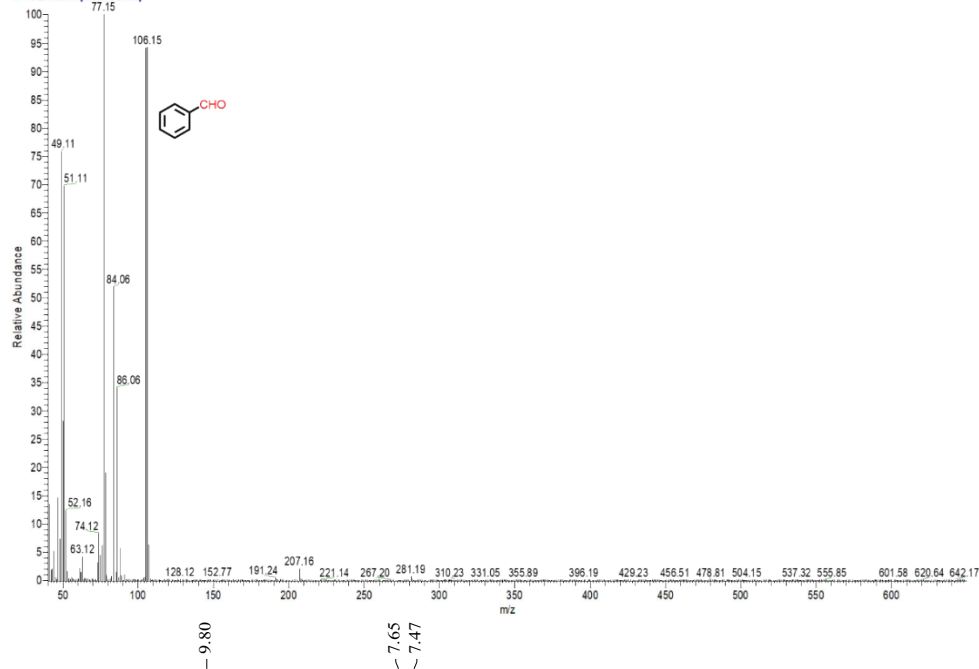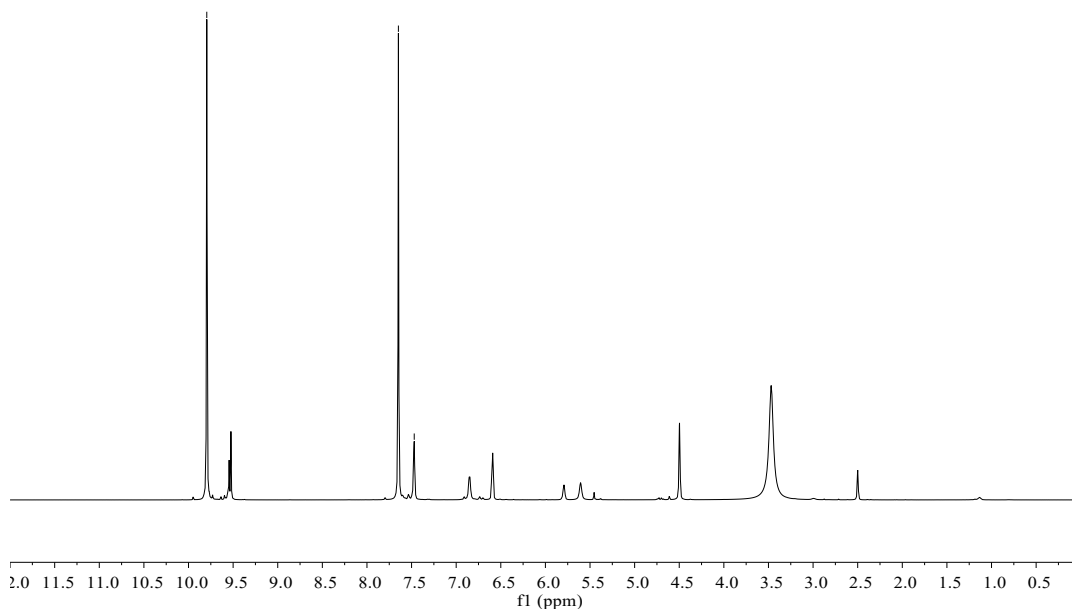

HPLC, GC-MS, and  $^1\text{H}$  NMR spectrogram of benzaldehyde

# Phenyl acetaldehyde

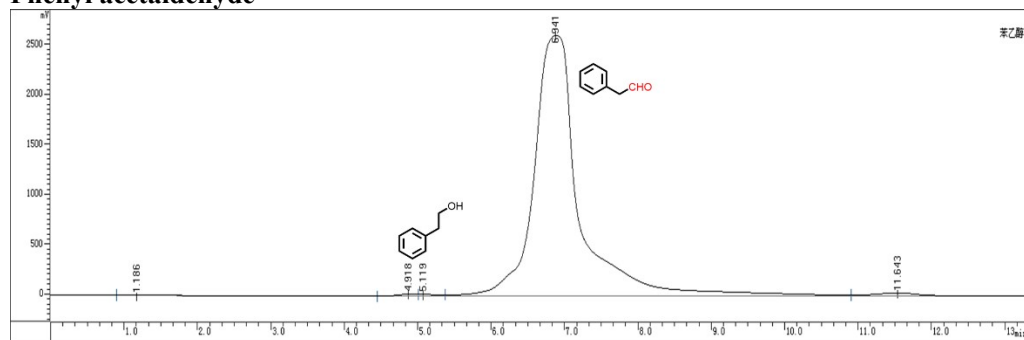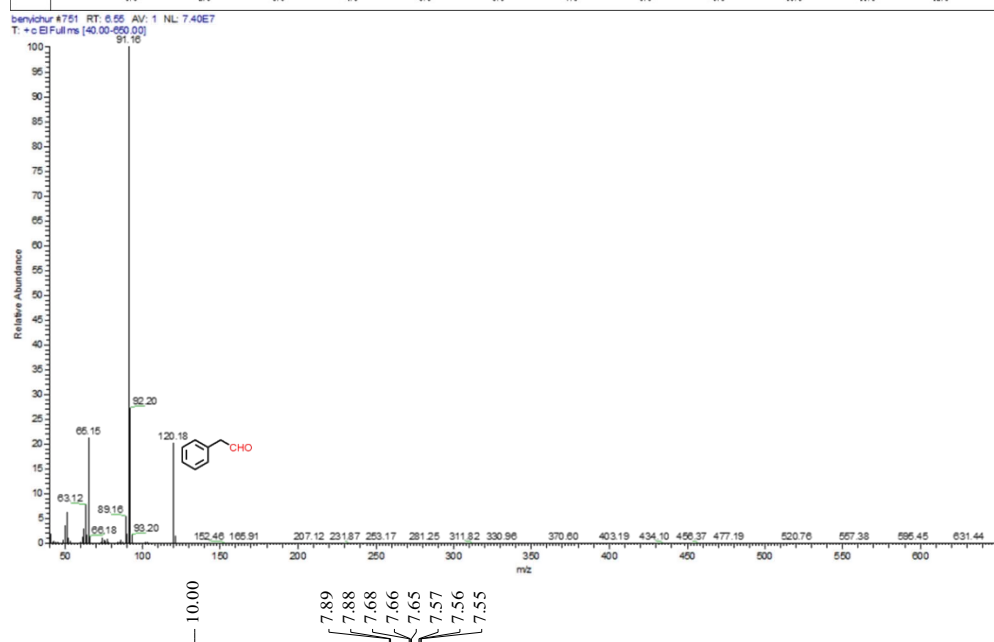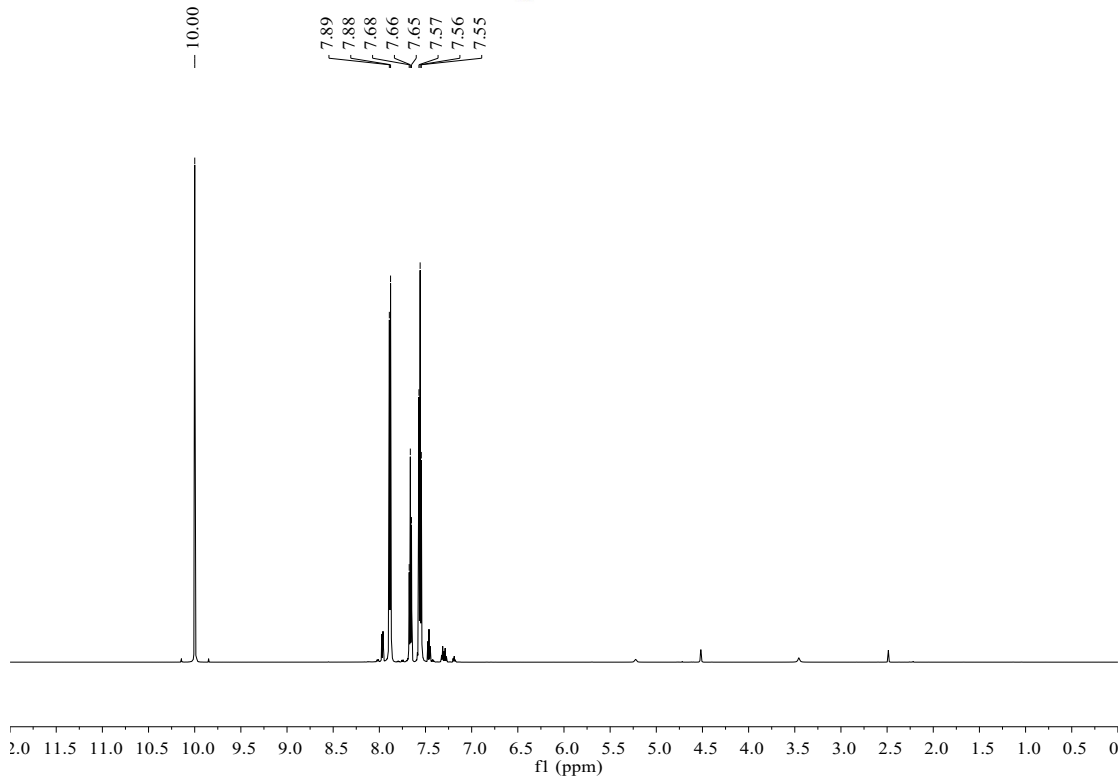

HPLC, GC-MS, and  $^1\text{H}$  NMR spectrogram of phenyl acetaldehyde

# 4-Formylpyridine

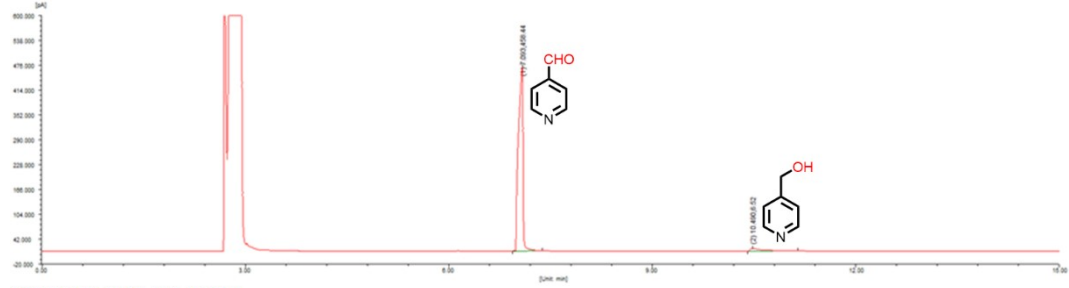

bidinola:cur #412 RT: 5.40 AV: 1 NL: 902E7  
T: +c EI Full ms [40.00-650.00]

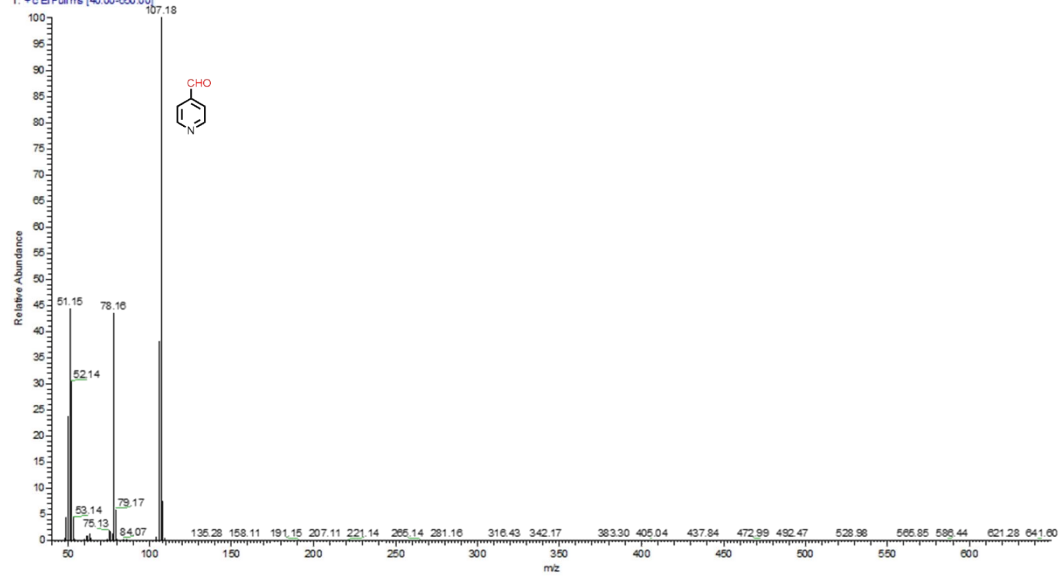

10.09  
8.86  
7.78

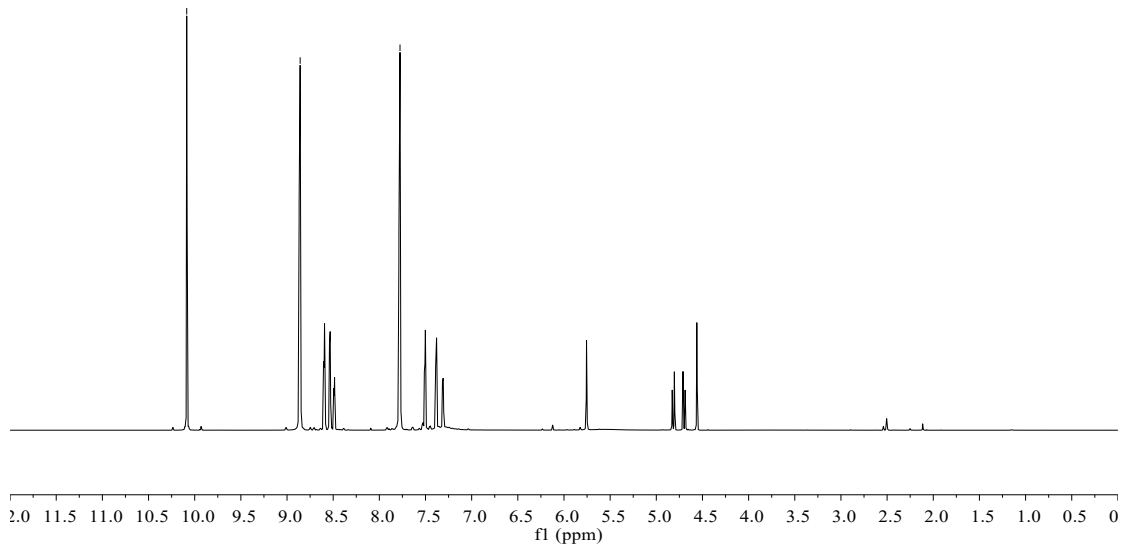

GC, GC-MS, and <sup>1</sup>H NMR spectrogram of 4-formylpyridine

# Cinnamaldehyde

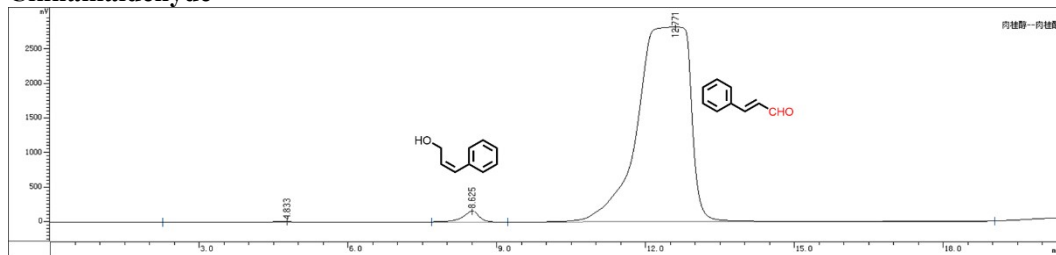

rouquelchur #1578 RT: 9.36 AV: 1 NL: 1.32E7  
T: +c EI Fullms [40.00-650.00]

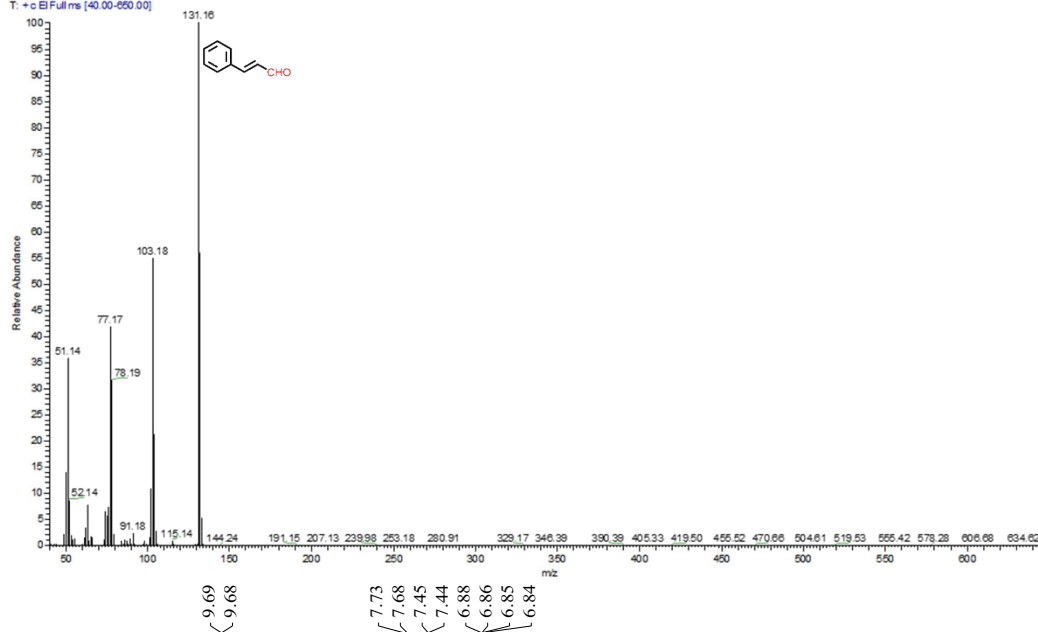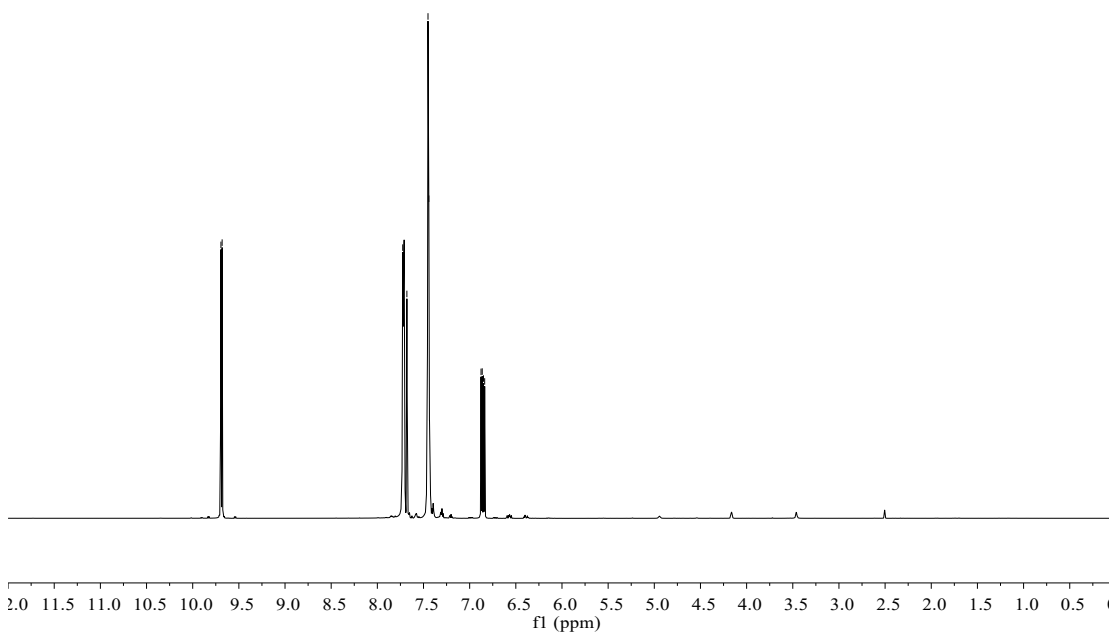

HPLC, GC-MS, and  $^1\text{H}$  NMR spectrogram of cinnamaldehyde

# Furfural

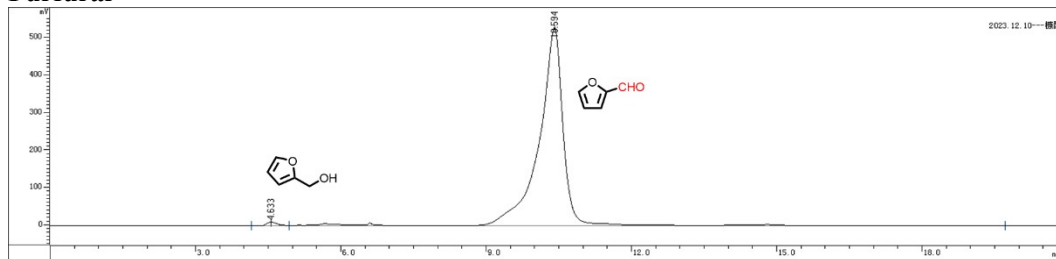

25-JXL #2849 RT: 14.69 AV: 1 NL: 2.21E7

T: + c EI Full ms [40.00-650.00]

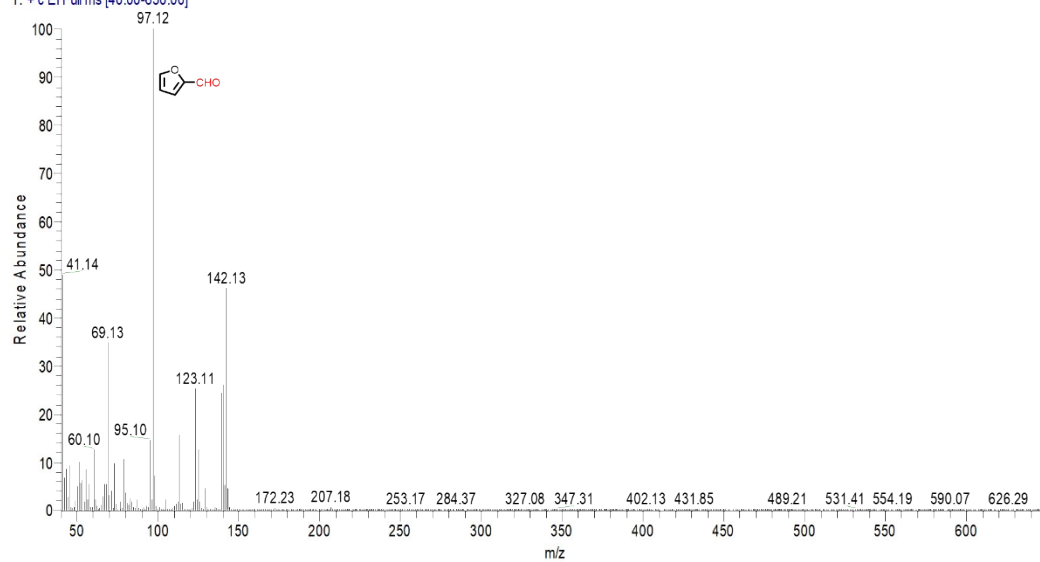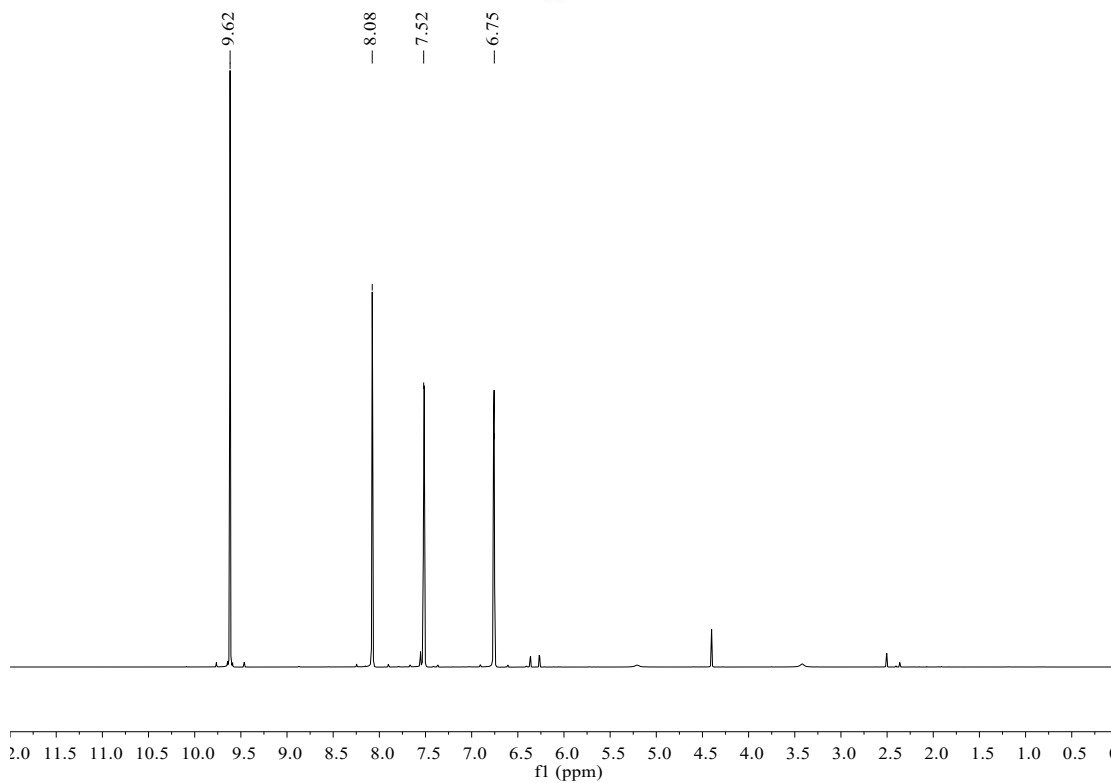

HPLC, GC-MS, and <sup>1</sup>H NMR spectrogram of furfural



## 2, 5-Diformylfuran

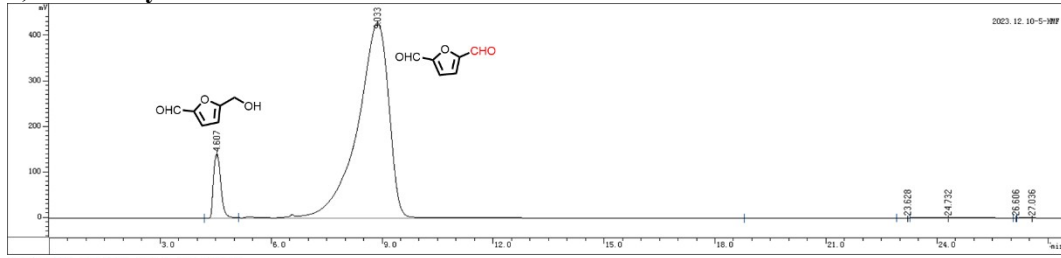

26-2 #1106 RT: 7.26 AV: 1 NL: 2.71E7  
T: + c EI Full ms [40.00-650.00]

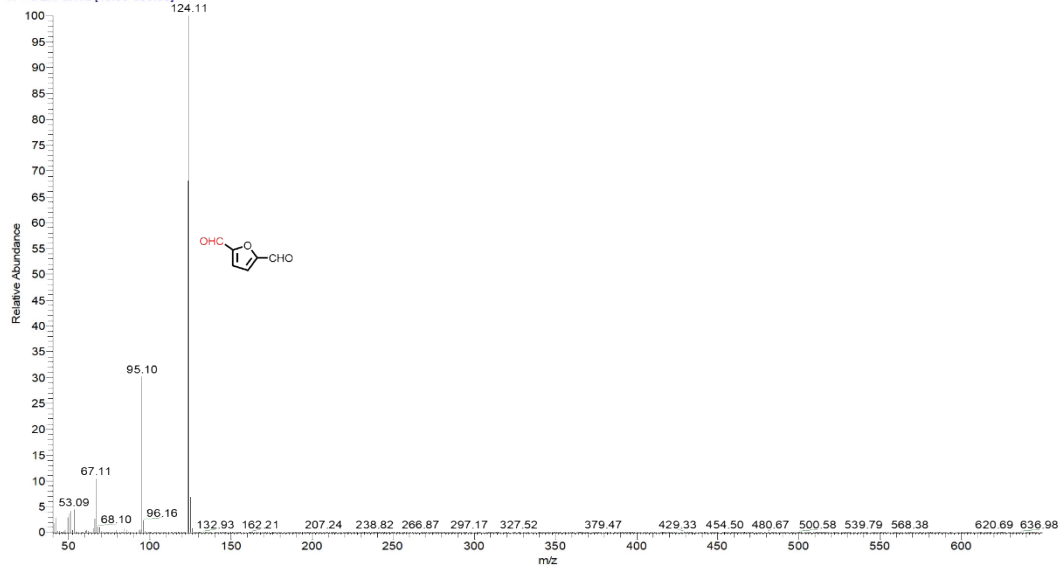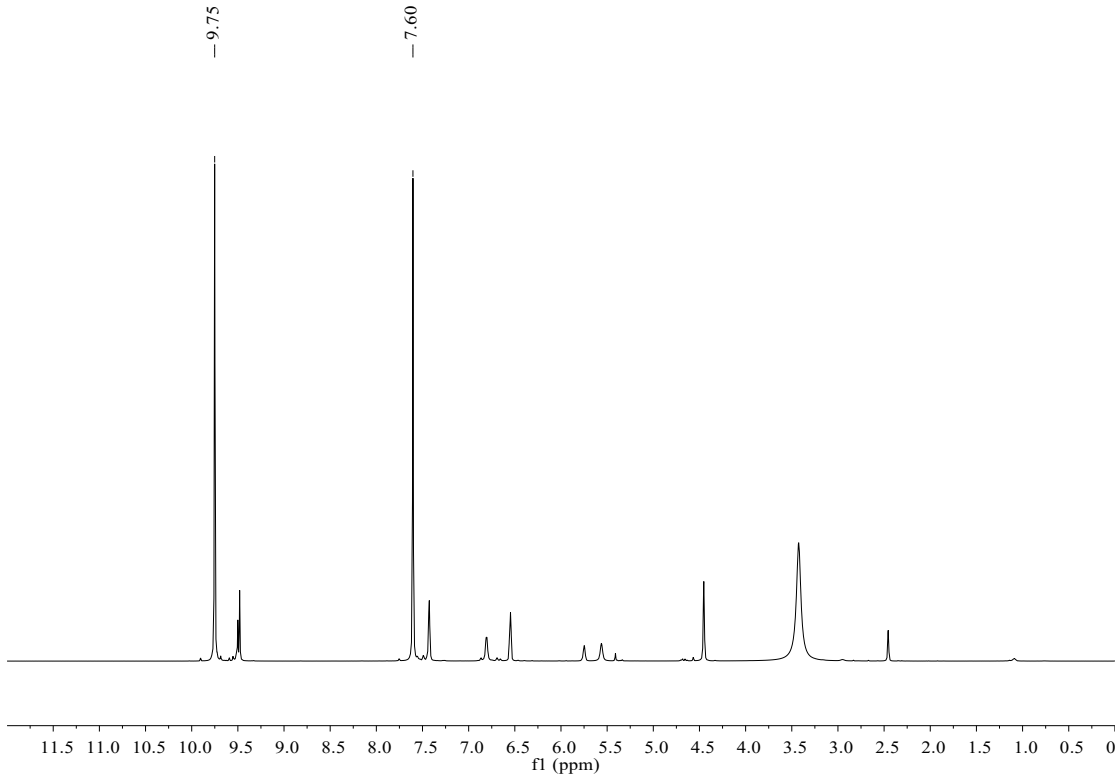

HPLC, GC-MS, and  $^1\text{H}$  NMR spectrogram of 2, 5-diformylfuran

# 5-Methylfurfural

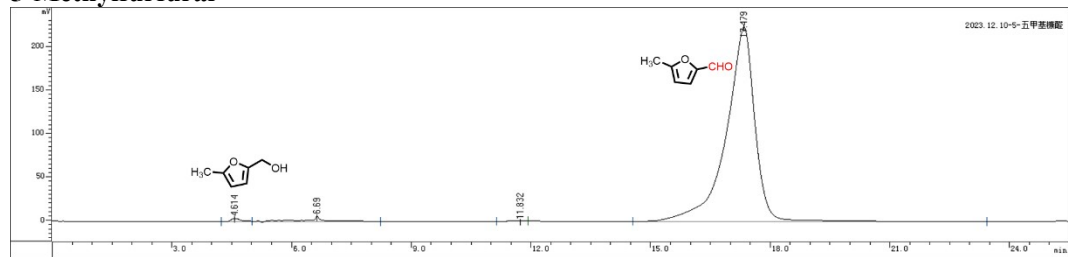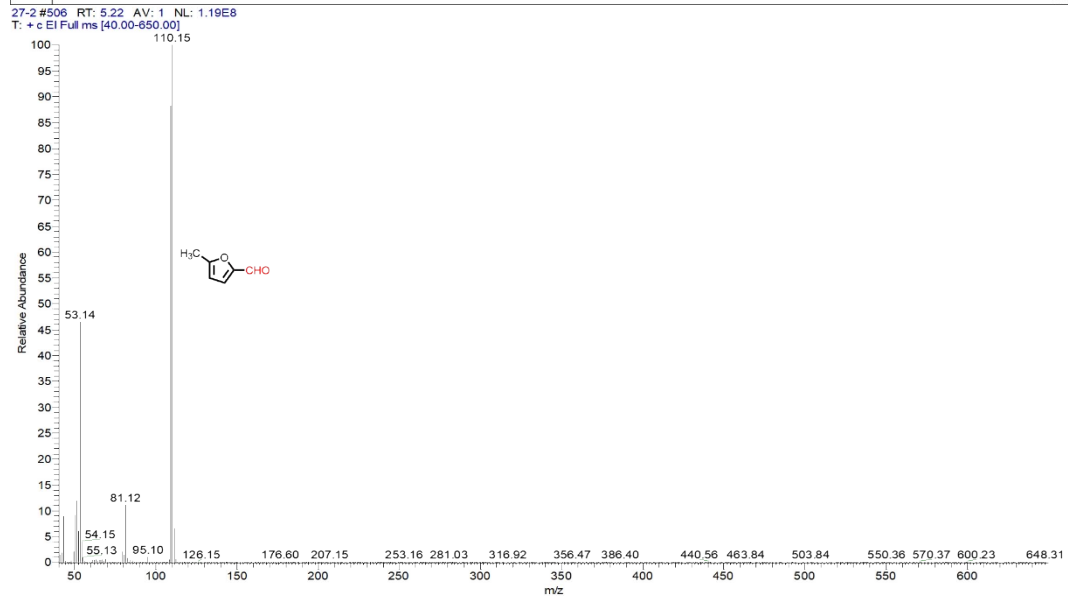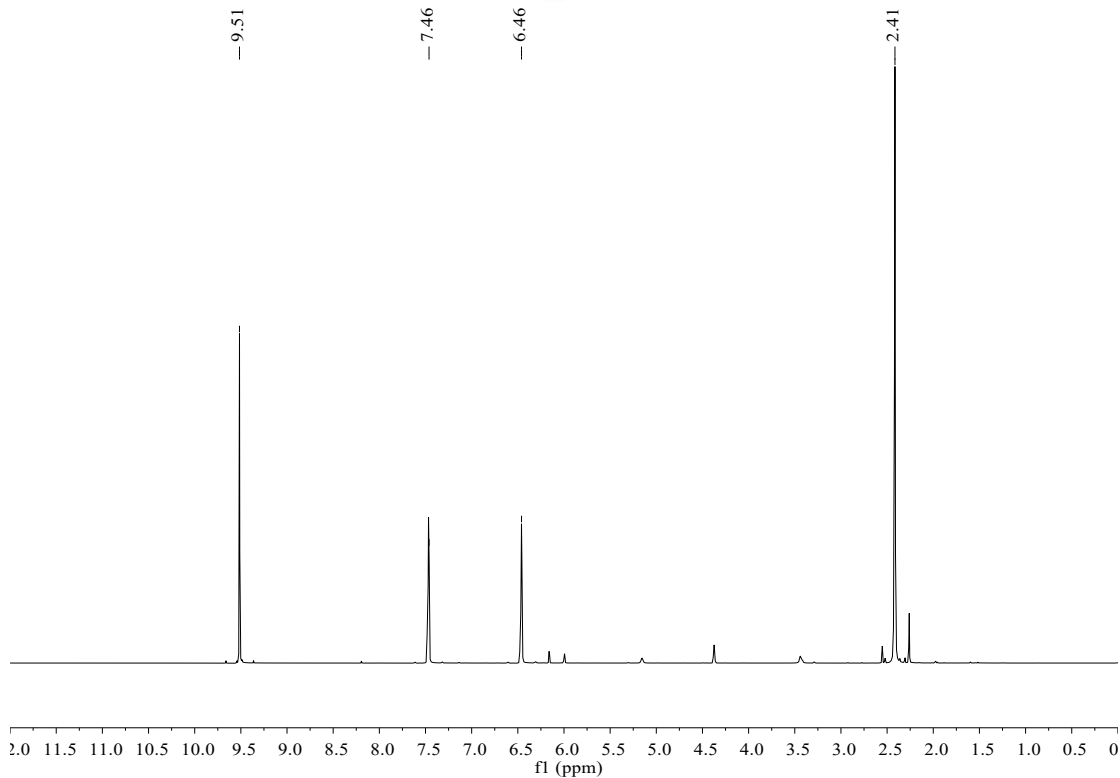

HPLC, GC-MS, and <sup>1</sup>H NMR spectrogram of 5-methylfurfural

# 5-Formyl-2-Furoic Acid

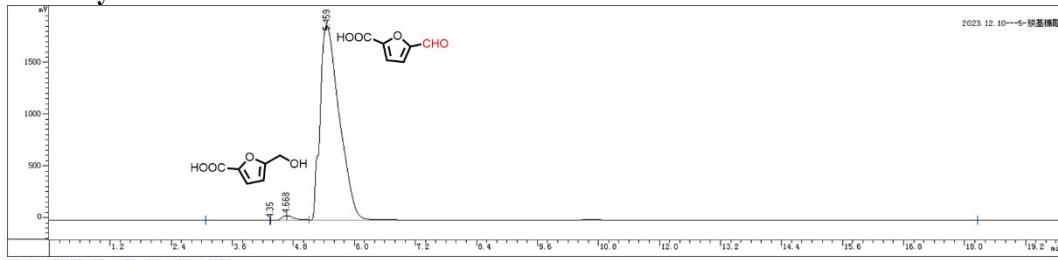

28-JXL-3#2877 RT: 14.78 AV: 1 NL: 1.80E8  
T: + e EI Full ms (40.00-650.00)

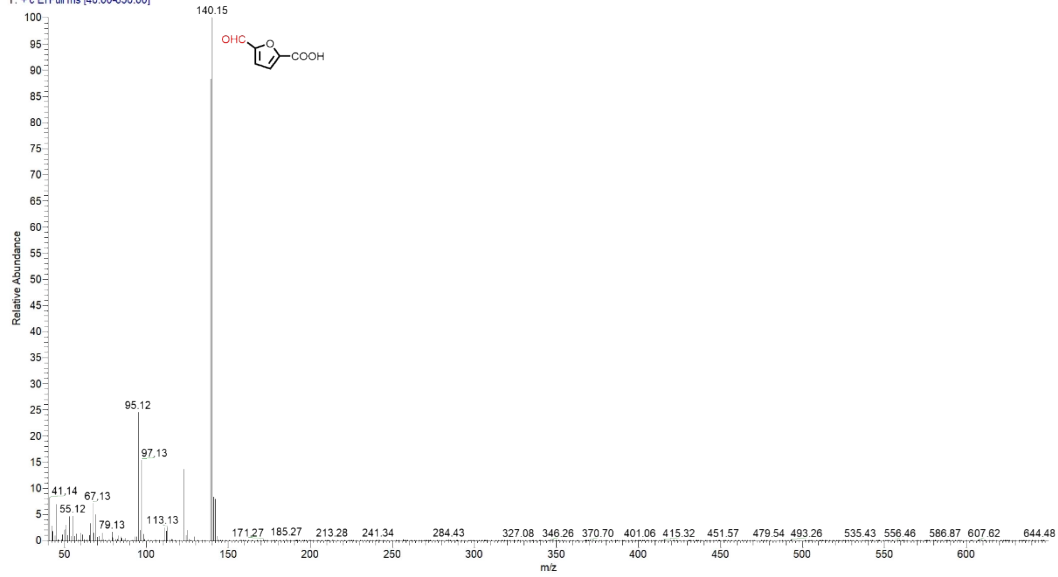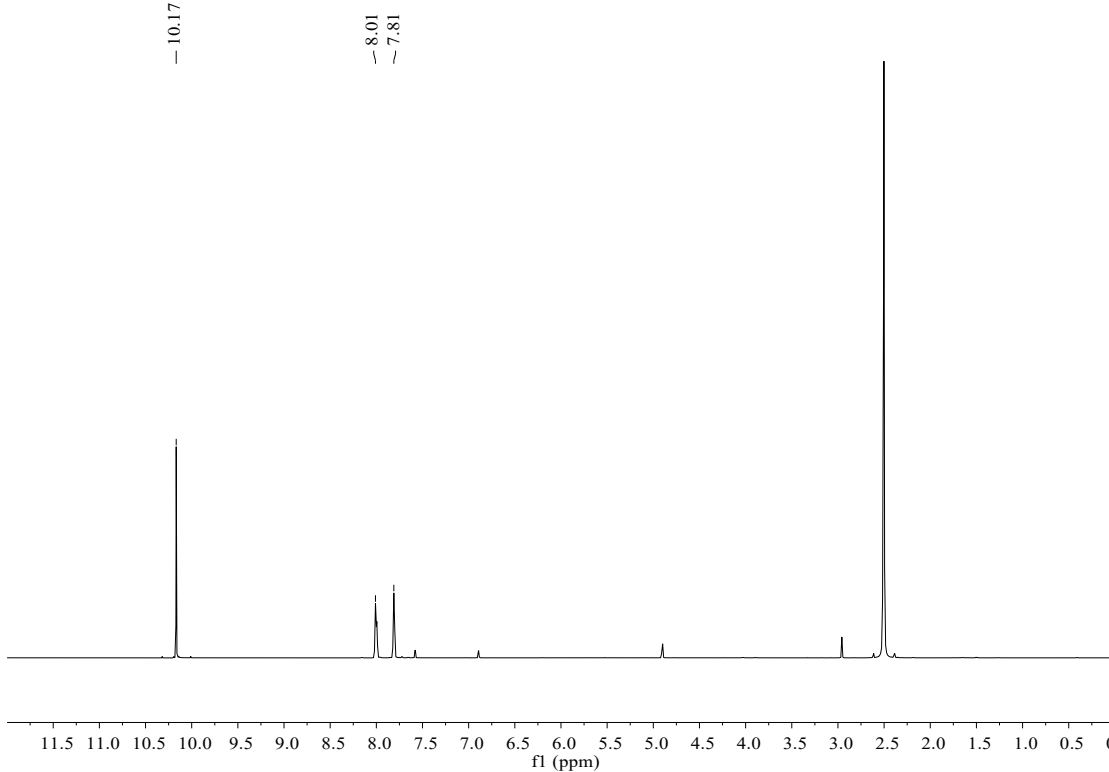

HPLC, GC-MS, and <sup>1</sup>H NMR spectrogram of 5-formylfuran-2-carboxylic acid

## 2-Thiophene formaldehyde

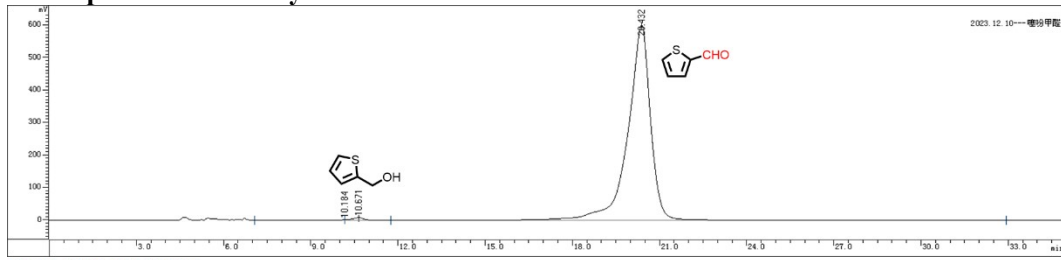

20.62 RT: 5.90 AV: 1 NL: 5.95E7

T: c-c Full ms [40.00-650.00]

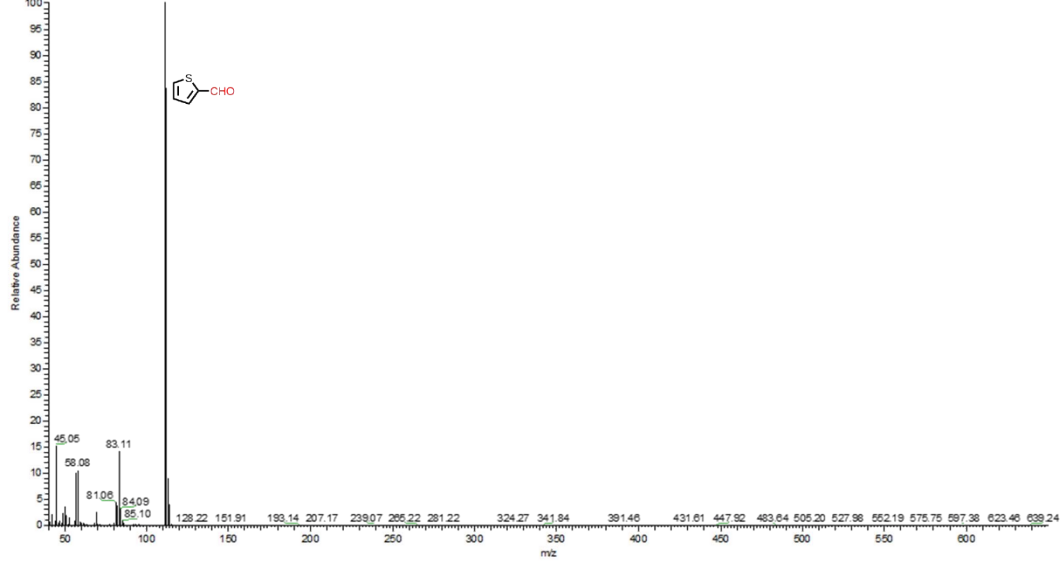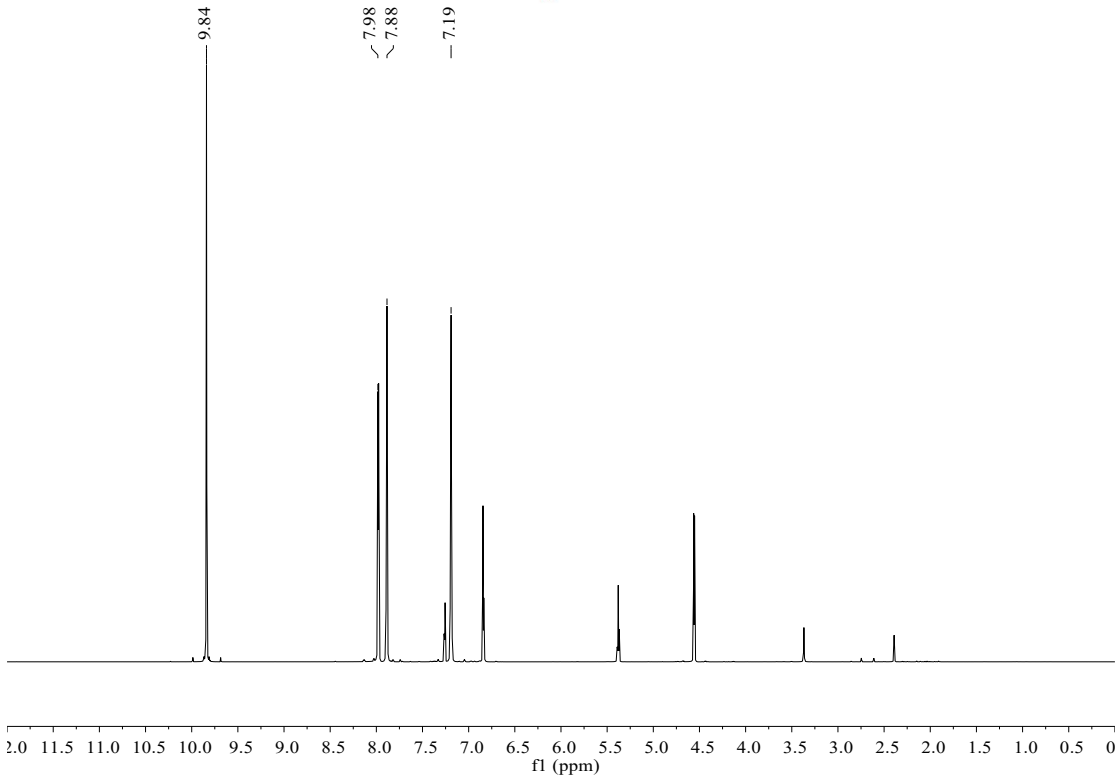

HPLC, GC-MS, and  $^1\text{H}$  NMR spectrogram of 2-thiophene formaldehyde

# 4-Quinoline formaldehyde

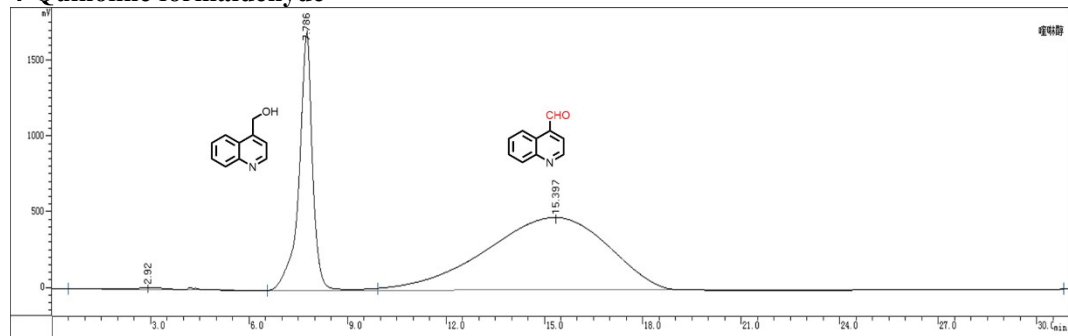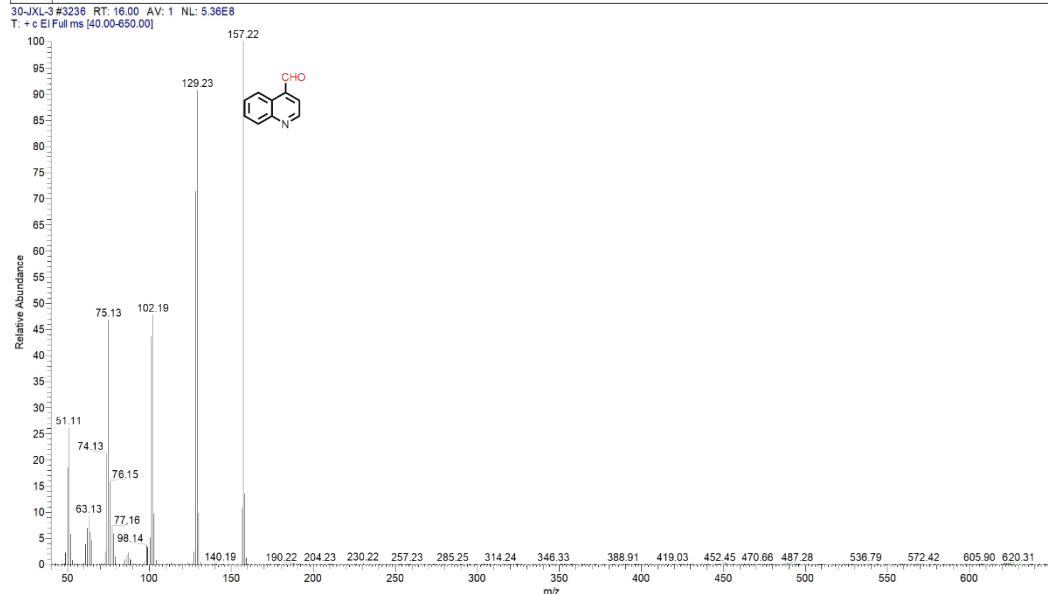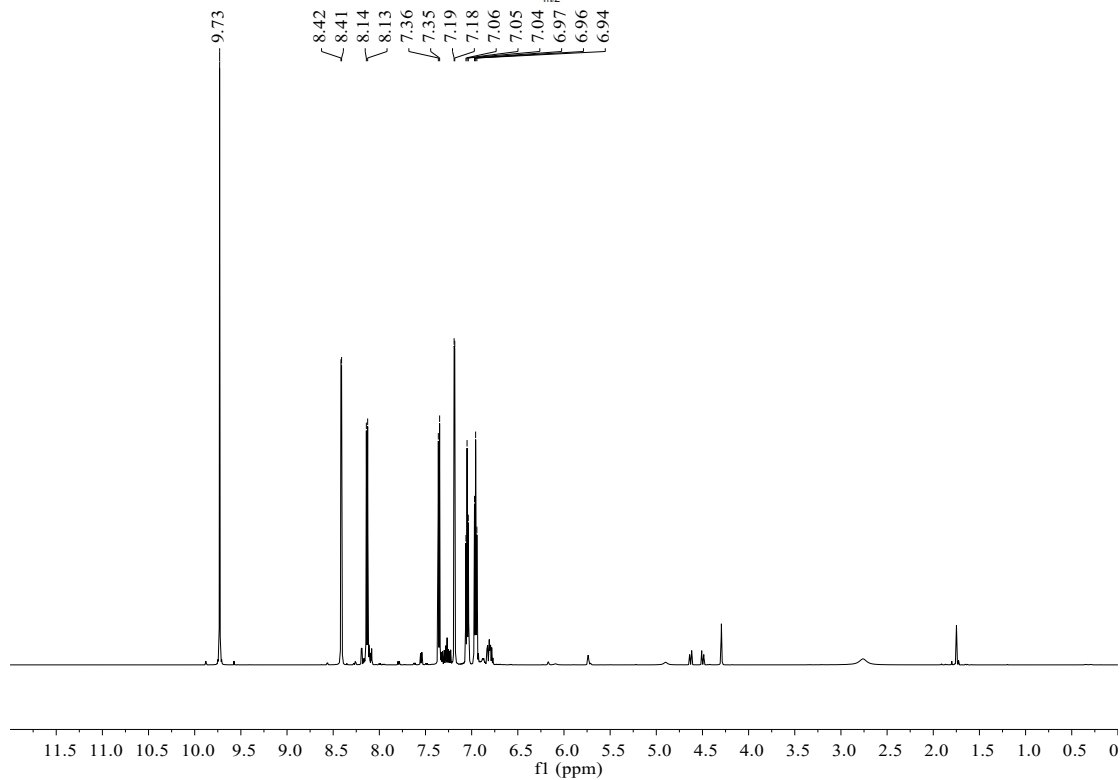

HPLC, GC-MS, and <sup>1</sup>H NMR spectrogram of 4-quinoline formaldehyde

### 3-Indolecarboxaldehyde

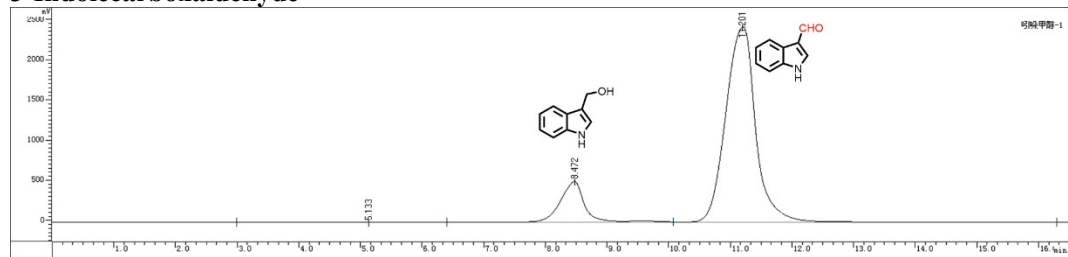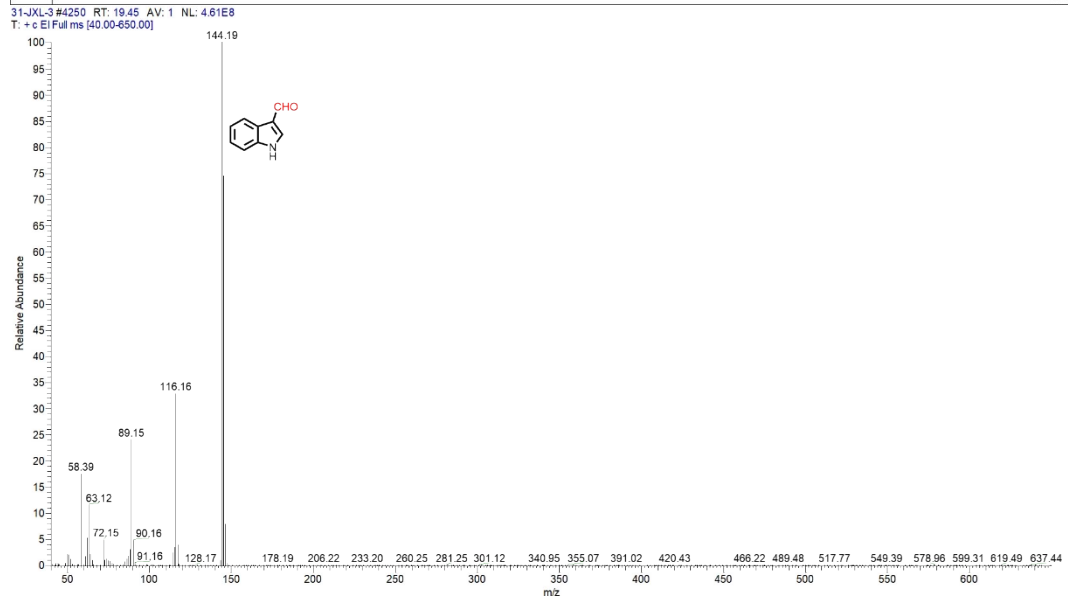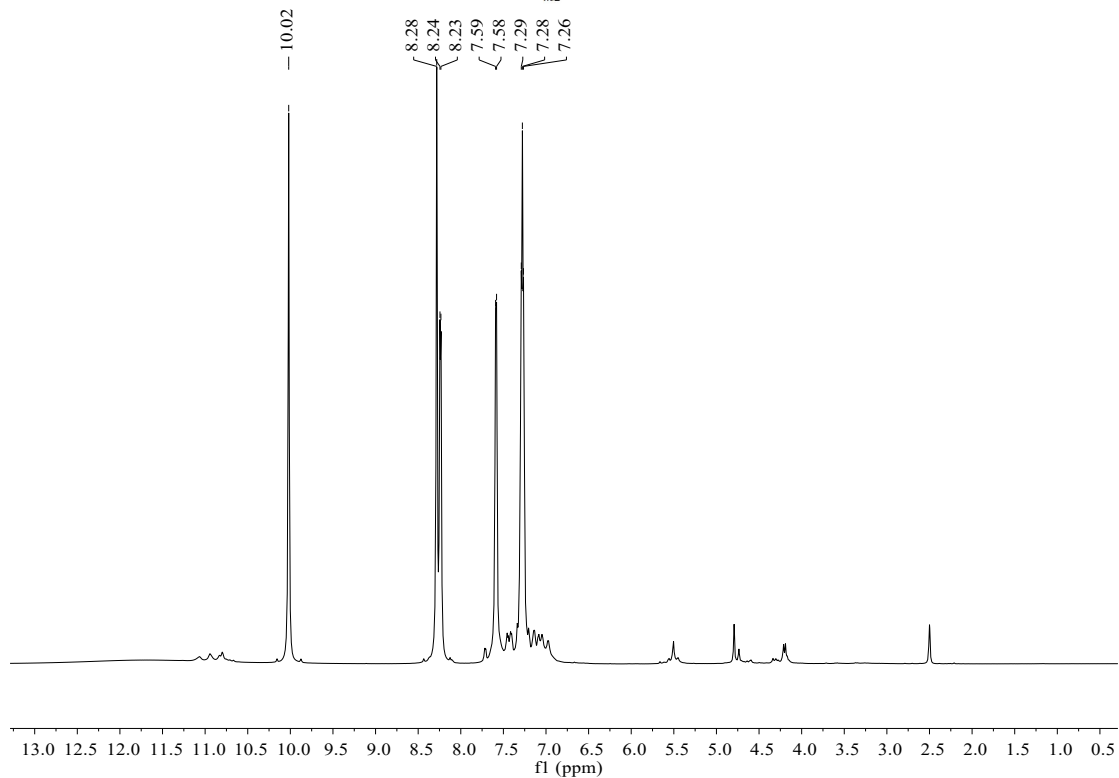

HPLC, GC-MS, and <sup>1</sup>H NMR spectrogram of 3-indolecarboxaldehyde

# Cyclohexanone

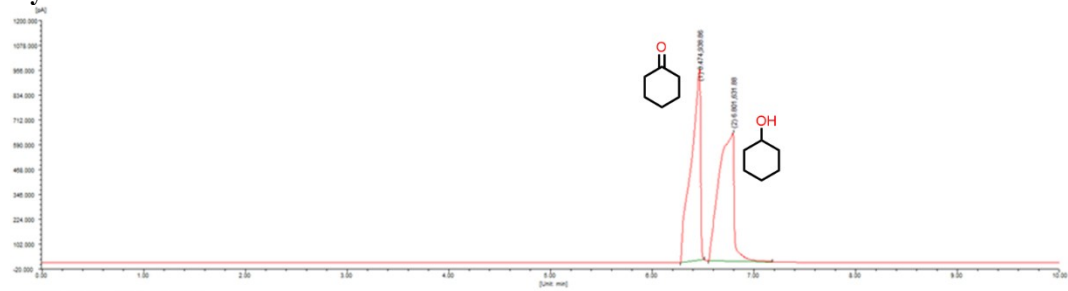

19-2 #154 RT: 4.02 AV: 1 NL: 4.26E8  
T: +c EI Full ms [40.00-650.00]

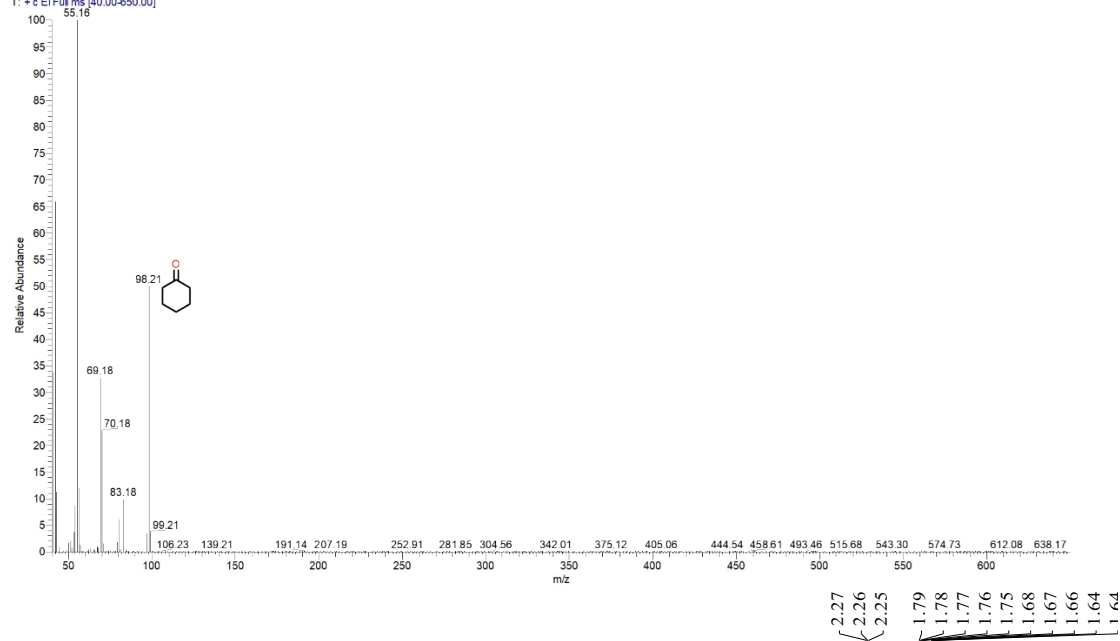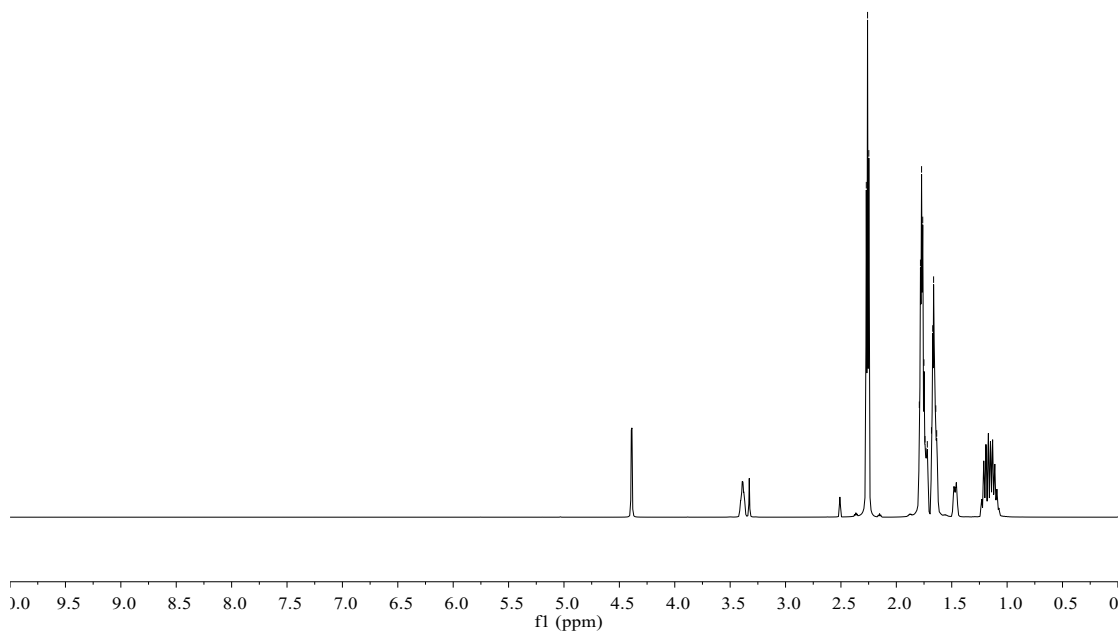

GC, GC-MS, and  $^1\text{H}$  NMR spectrogram of cyclohexanone

# n-Propionaldehyde

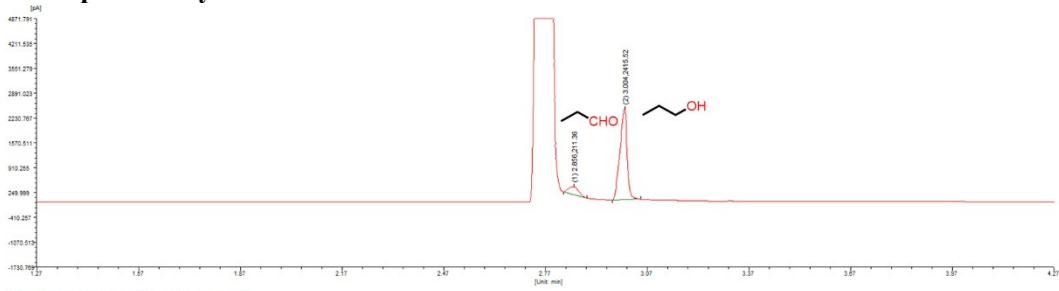

123-JXL-33-2 #2754 RT: 15.36 AV: 1 NL: 4.50E5  
T: + c EI Fullms [40.00-650.00]

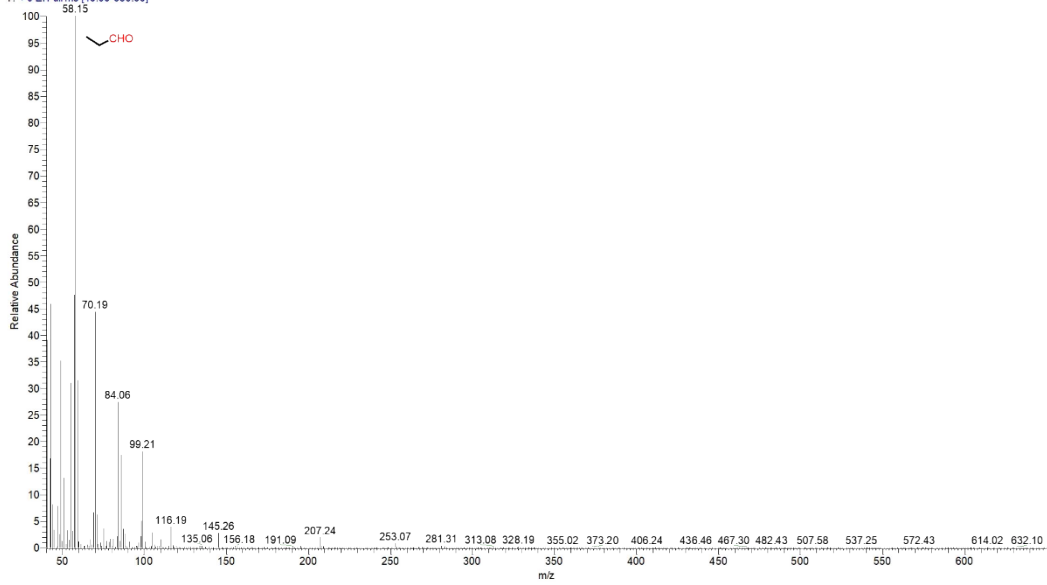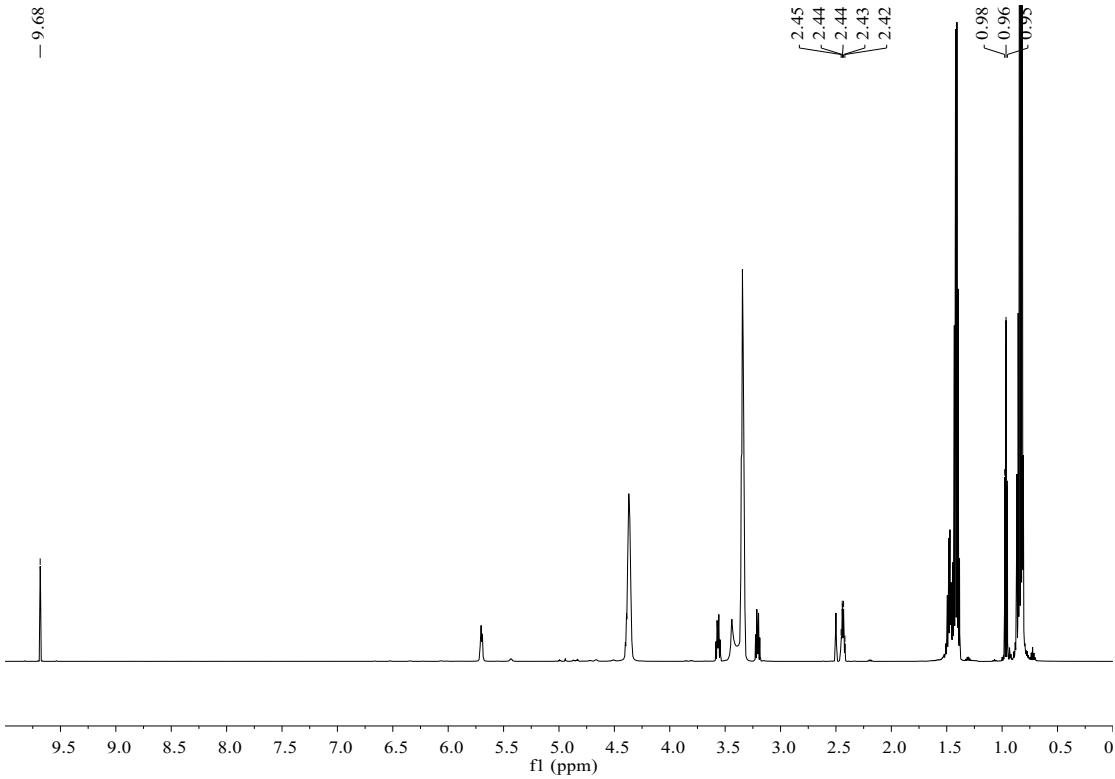

GC, GC-MS, and <sup>1</sup>H NMR spectrogram of n-propionaldehyde



# n-Butylaldehyde

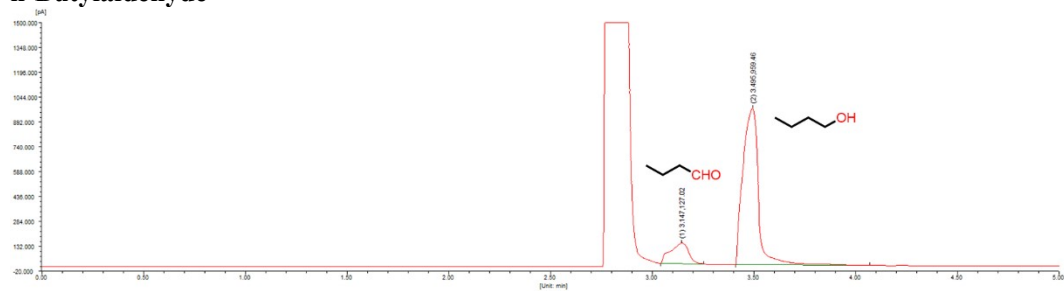

34-2 #1368 RT: 9.65 AV: 1 NL: 2.84E5  
T: + e EI Fullms [40.00-650.00]

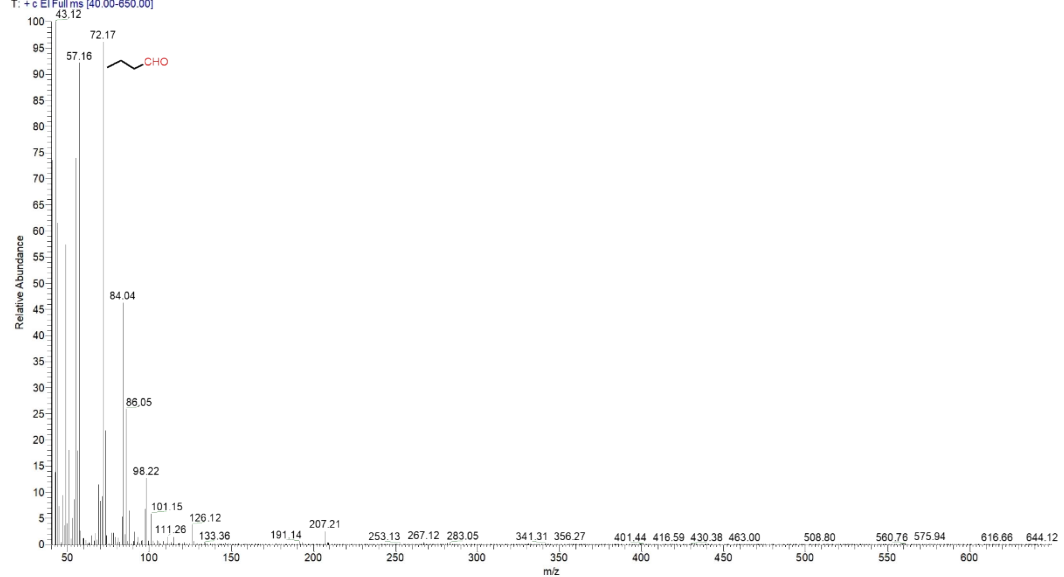

9.67

2.41  
2.40  
2.39  
1.43  
1.42  
1.40  
1.39  
1.38  
0.89  
0.87  
0.86

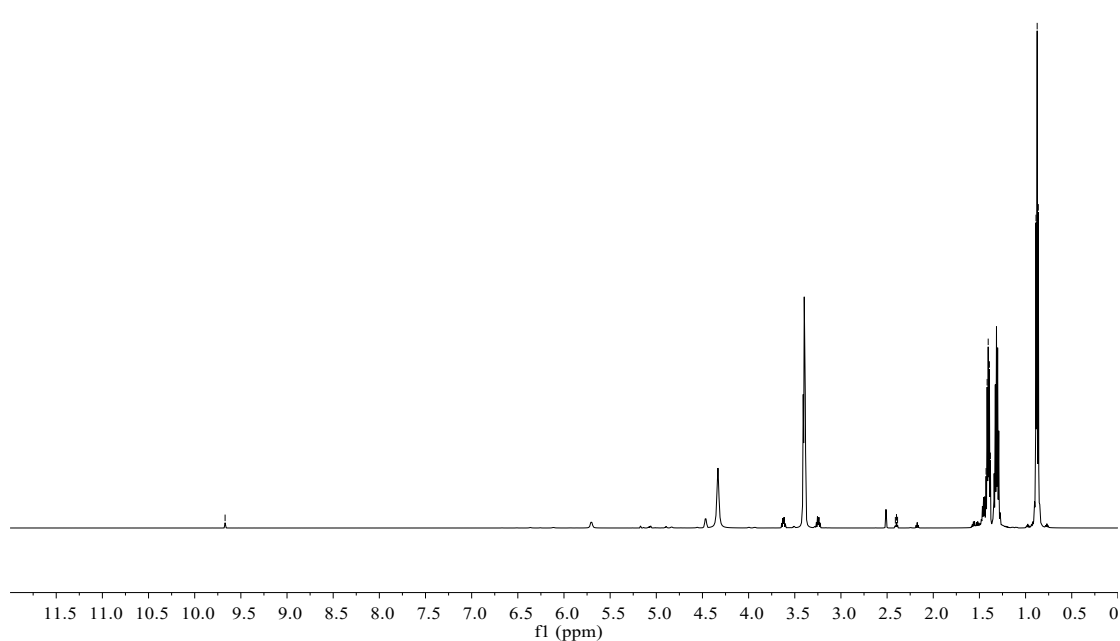

GC, GC-MS, and  $^1\text{H}$  NMR spectrogram of n-butylaldehyde

# n-Hexanal

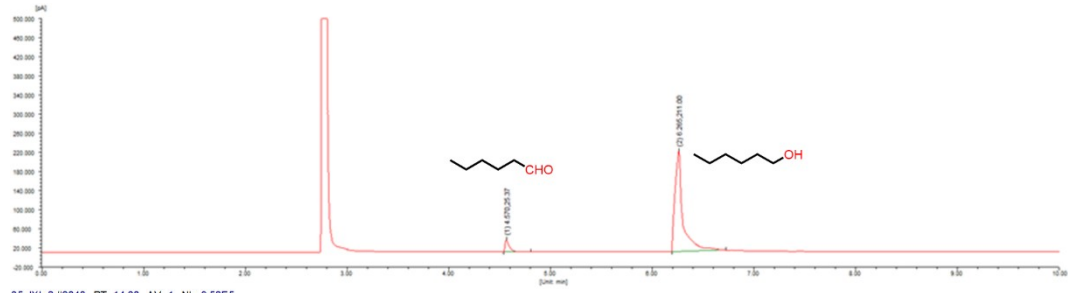

35-JXL-2 #2848 RT: 14.68 AV: 1 NL: 9.52E5  
T: °C EI Full ms [40.00-650.00]

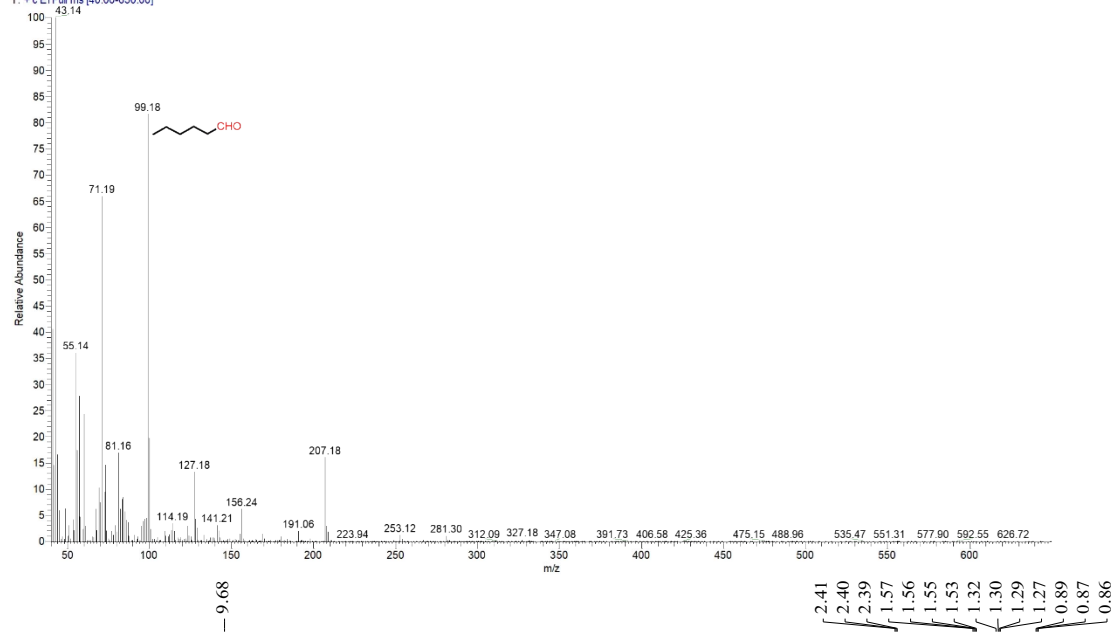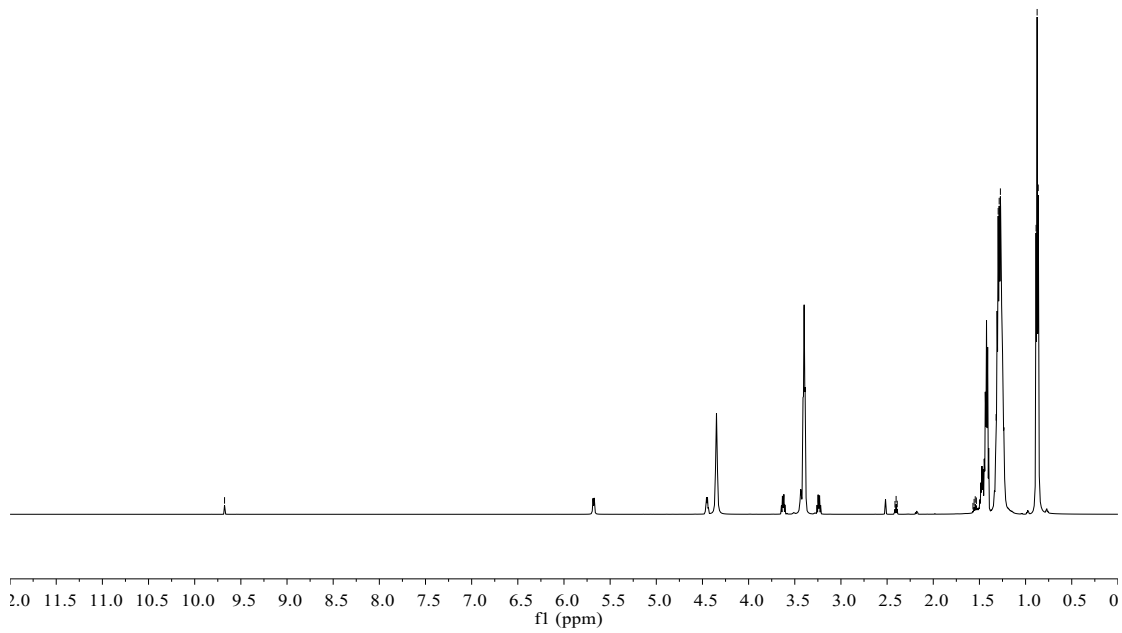

GC, GC-MS, and <sup>1</sup>H NMR spectrogram of n-hexanal

# n-Decanal

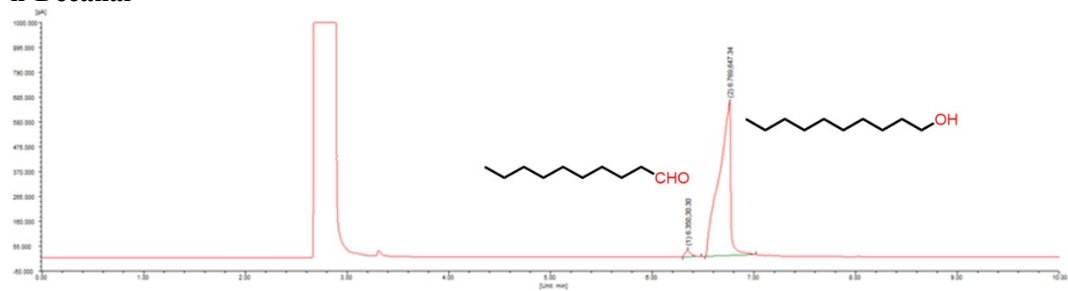

36-JXL-2 #3370 RT: 14.46 AV: 1 NL: 1.74E7  
 T: + c EI Full ms [40.00-650.00]

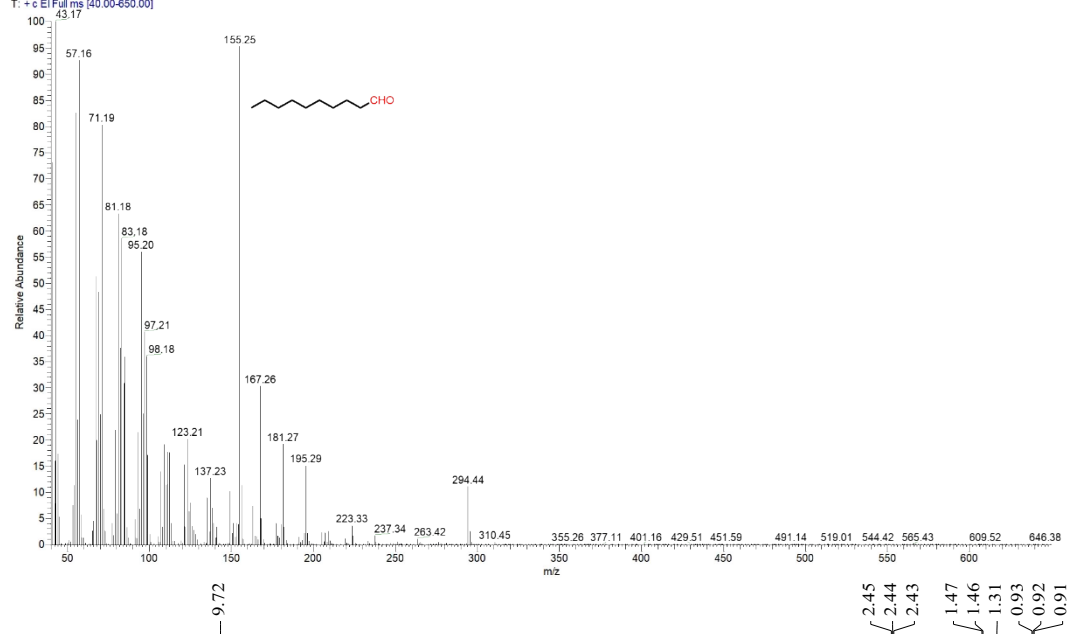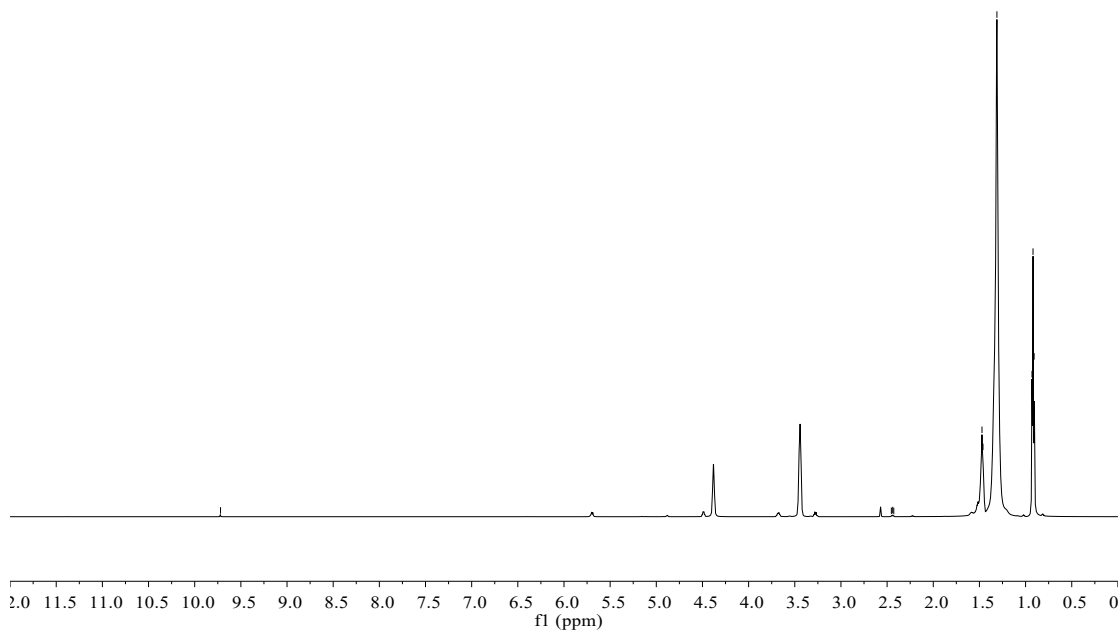

GC, GC-MS, and <sup>1</sup>H NMR spectrogram of n-decanal
